# Supplementary material for: The Synthesis of 3-(R)- and 3-(S)-Hydroxyeicosapentaenoic Acid
Source: MDPI journal article supplement (doi:10.3390/molecules27072295), 2022-04-01
Supplement: s1 [file s1]

# Supplementary Material

## Synthesis of 3-(*R*)- and 3-(*S*)-Hydroxyeicosapentaenoic Acid

Gard Gjessing <sup>1</sup>, Lars-Inge Gammelsæter Johnsen <sup>2</sup>, Simen Gjølseth Antonsen <sup>1,3</sup>, Jens M. J. Nolsøe <sup>1</sup>,  
Yngve Stenstrøm <sup>1,\*</sup> and Trond Vidar Hansen <sup>1,2,\*</sup>

<sup>1</sup> Department of Chemistry, Biotechnology and Food Science, Norwegian University of Life Sciences, P.O. Box 5003, NO-1433 Ås, Norway; gjegegar@gmail.com (G.G.); simen.antonsen@oslomet.no (S.G.A.); jens.mj.nolsoe@nmbu.no (J.M.J.N.)

<sup>2</sup> Section of Pharmaceutical Chemistry, Department of Pharmacy, University of Oslo, P.O. Box 1068 Blindern, NO-0316 Oslo, Norway; lars.inge1988@gmail.com

<sup>3</sup> Department of Mechanical, Electronic and Chemical Engineering, Faculty of Technology, Art and Design, OsloMet, P.O. Box 4, St. Olavs Plass, NO-0130 Oslo, Norway

\* Correspondence: yngve.stenstrom@nmbu.no (Y.S.); t.v.hansen@farmasi.uio.no (T.V.H.)

### Table of Contents

|                                                           |    |
|-----------------------------------------------------------|----|
| Iodolactone 6: .....                                      | 2  |
| Epoxide 7:.....                                           | 5  |
| Acetal 8: .....                                           | 8  |
| Aldehyde 4: .....                                         | 11 |
| Auxiliary 5b: .....                                       | 14 |
| Aldol products 9b: .....                                  | 17 |
| TBS protected aldol product 10:.....                      | 27 |
| TBS protected ethyl ester 11:.....                        | 32 |
| 3( <i>R</i> )-HEPE (2): .....                             | 37 |
| Aldol product 13:.....                                    | 45 |
| ( <i>R</i> )-4-isopropylthiazolidinone-2-thione 15: ..... | 47 |
| Ethyl ester 16: .....                                     | 50 |
| Mosher esters: .....                                      | 55 |

**Iodolactone 6:**

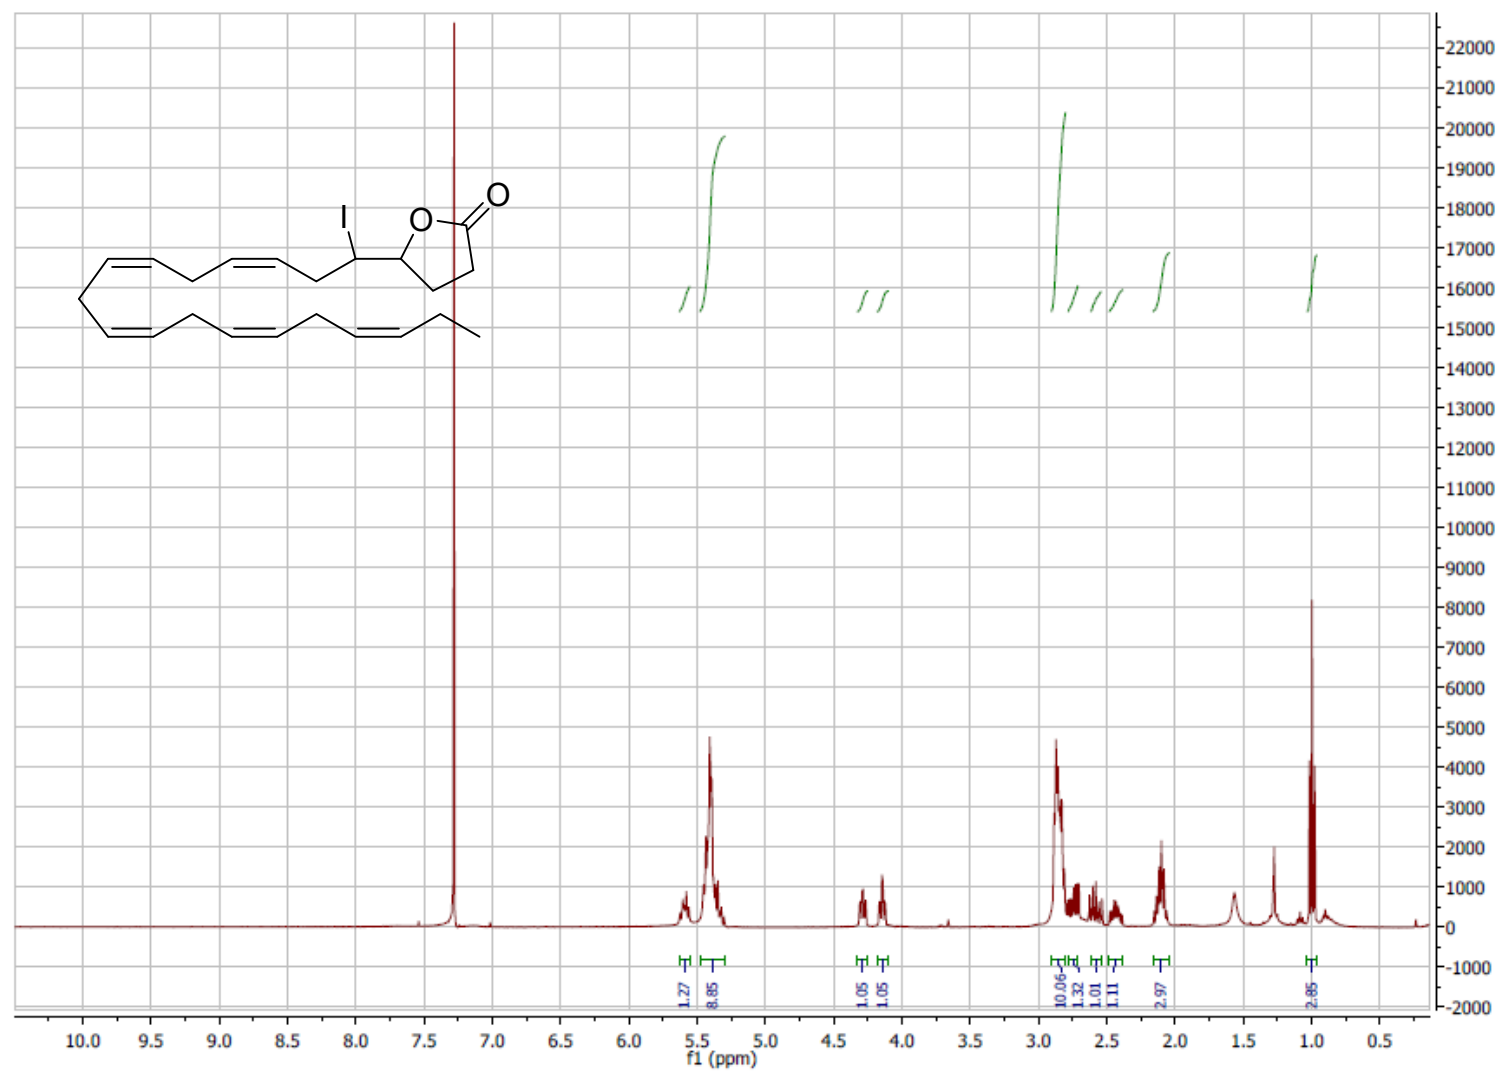

Figure S1  $^1\text{H}$  NMR spectrum of iodolactone 6.

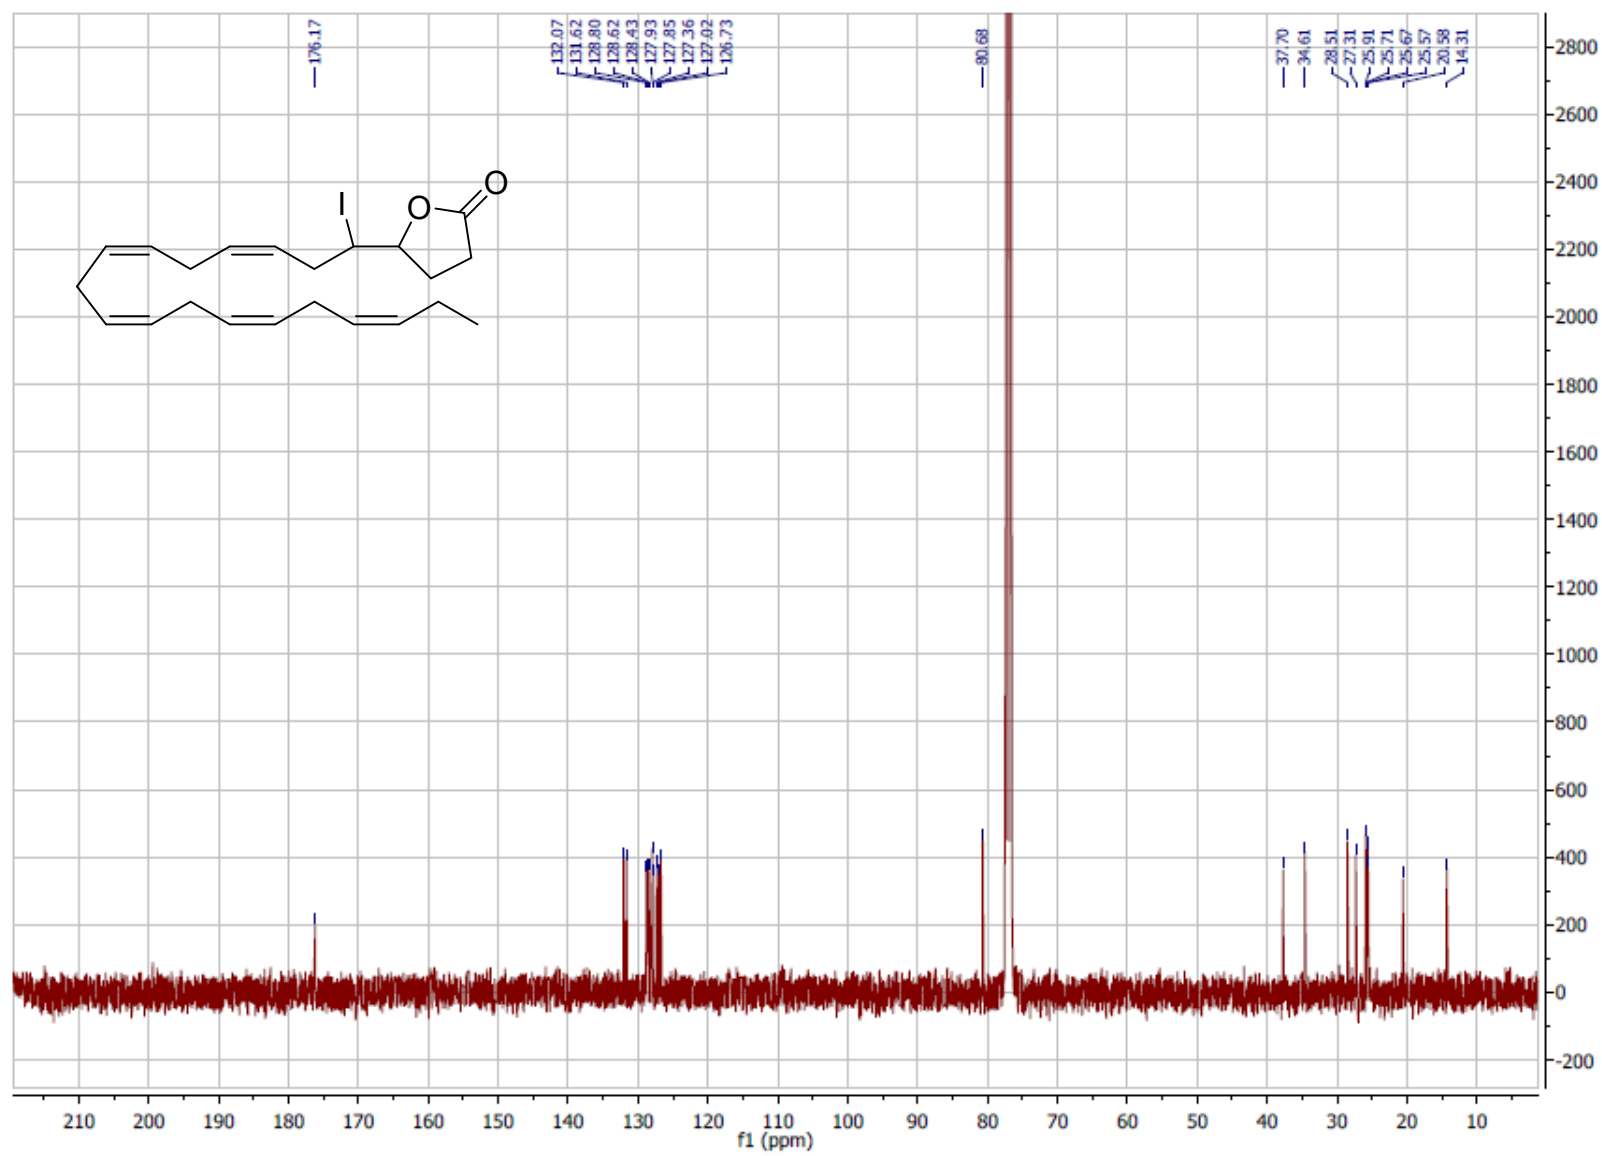

Figure S2  $^{13}\text{C}$  NMR spectrum of iodolactone 6.

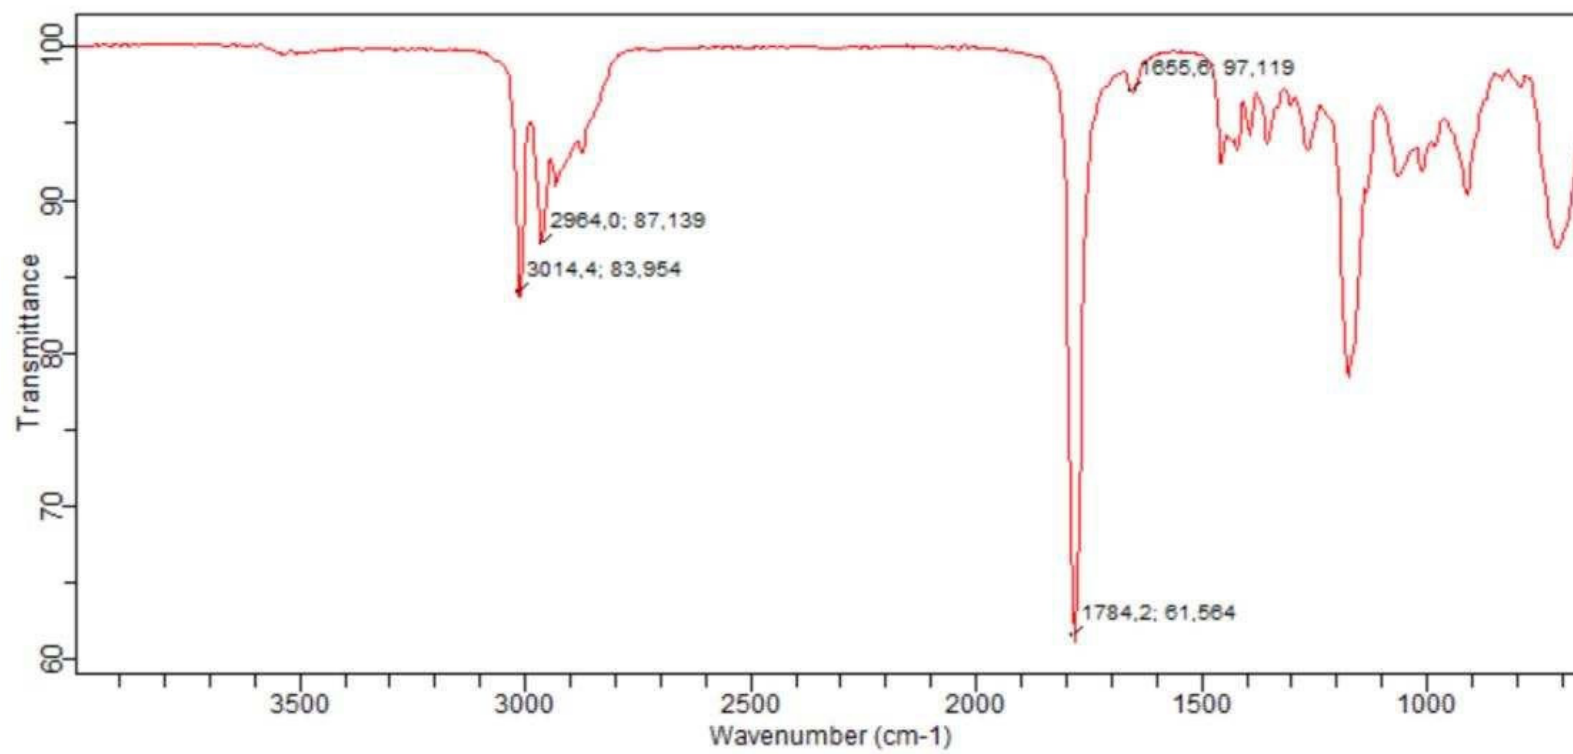

Figure S3 IR of iodolactone 6.

**Epoxide 7:**

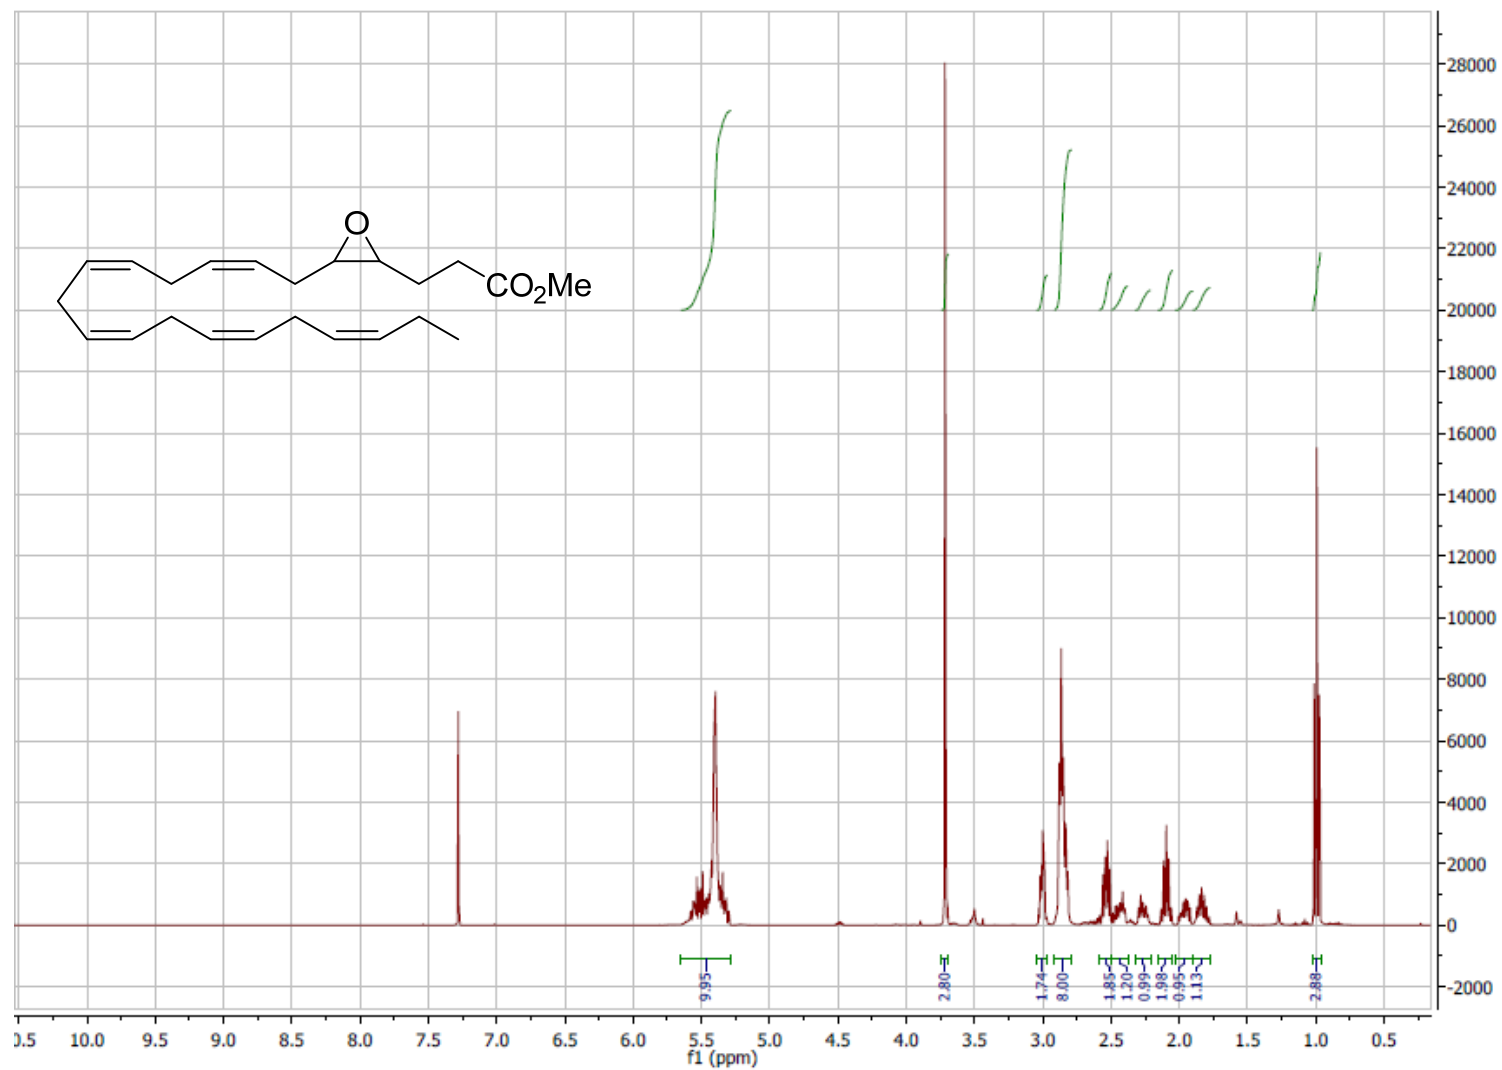

Figure S4  $^1\text{H}$  NMR spectrum of epoxide 7.

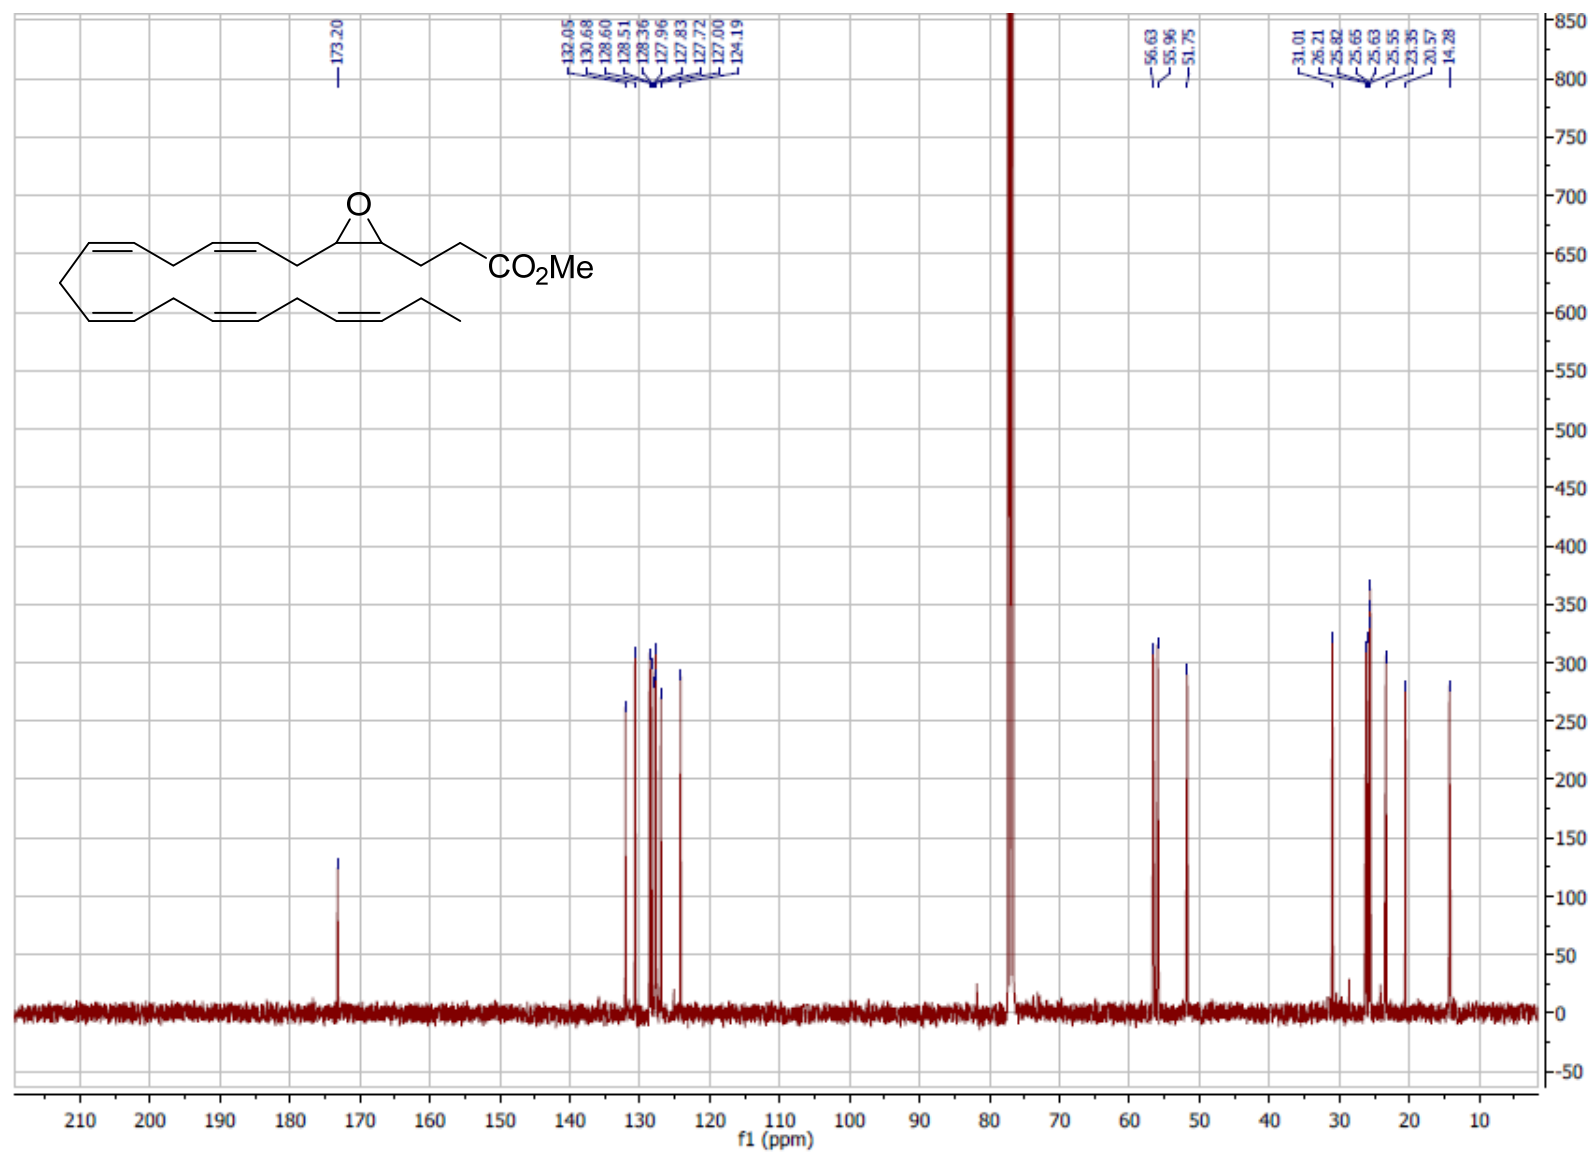

Figure S5  $^{13}\text{C}$  NMR spectrum of epoxide 7.

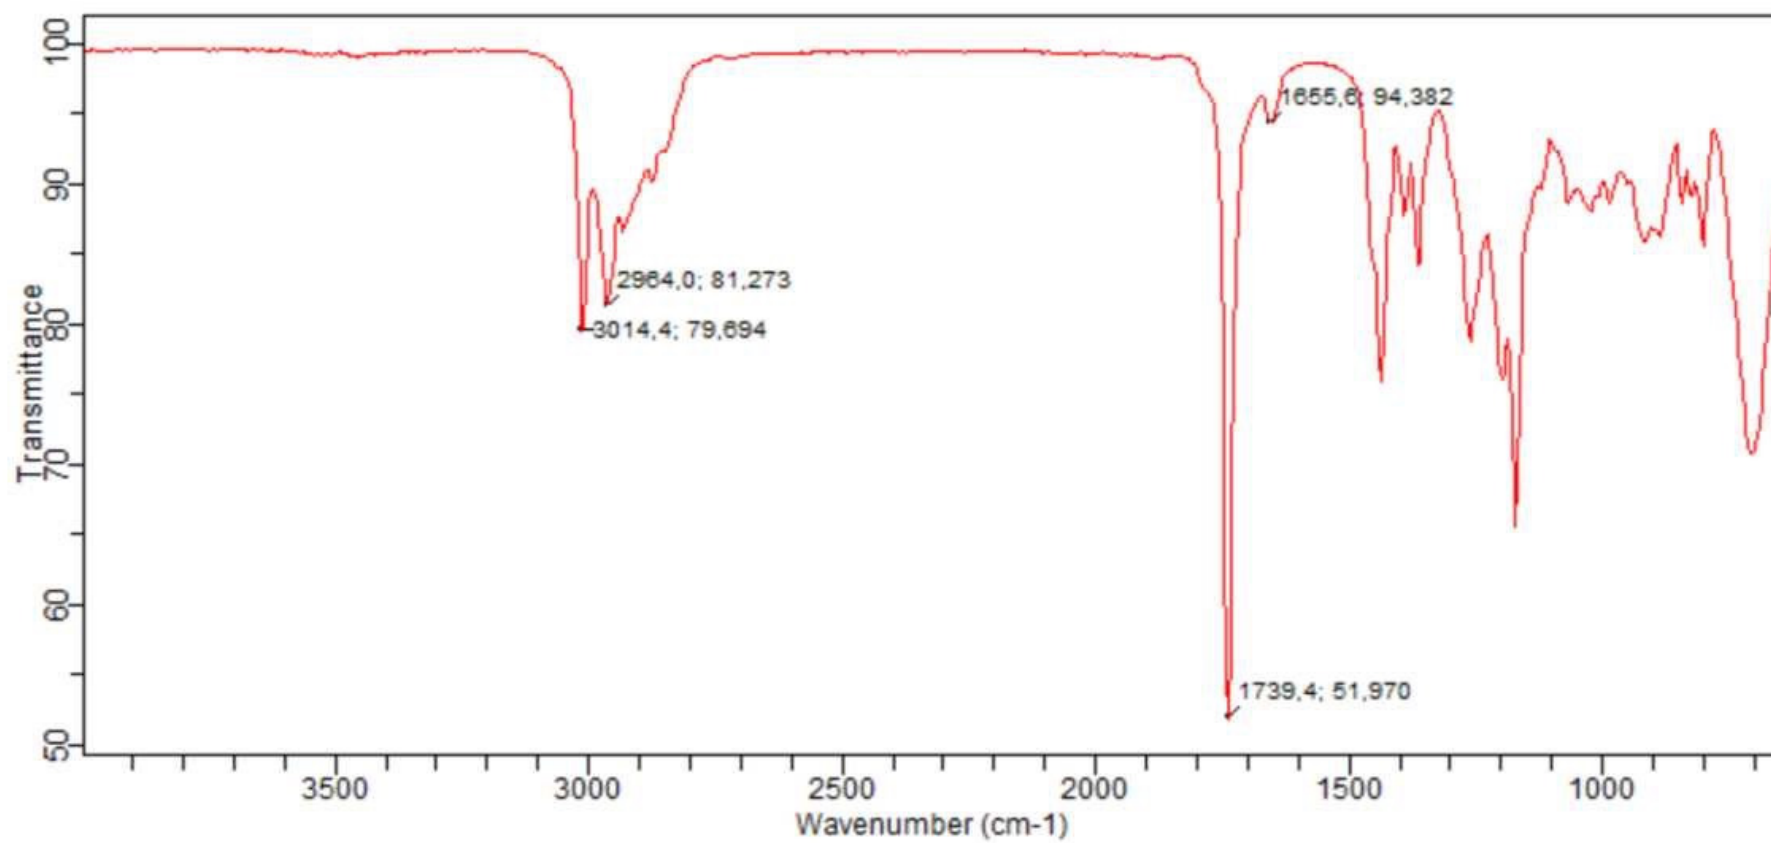

Figure S6 IR spectrum of epoxide 7

Acetal 8:

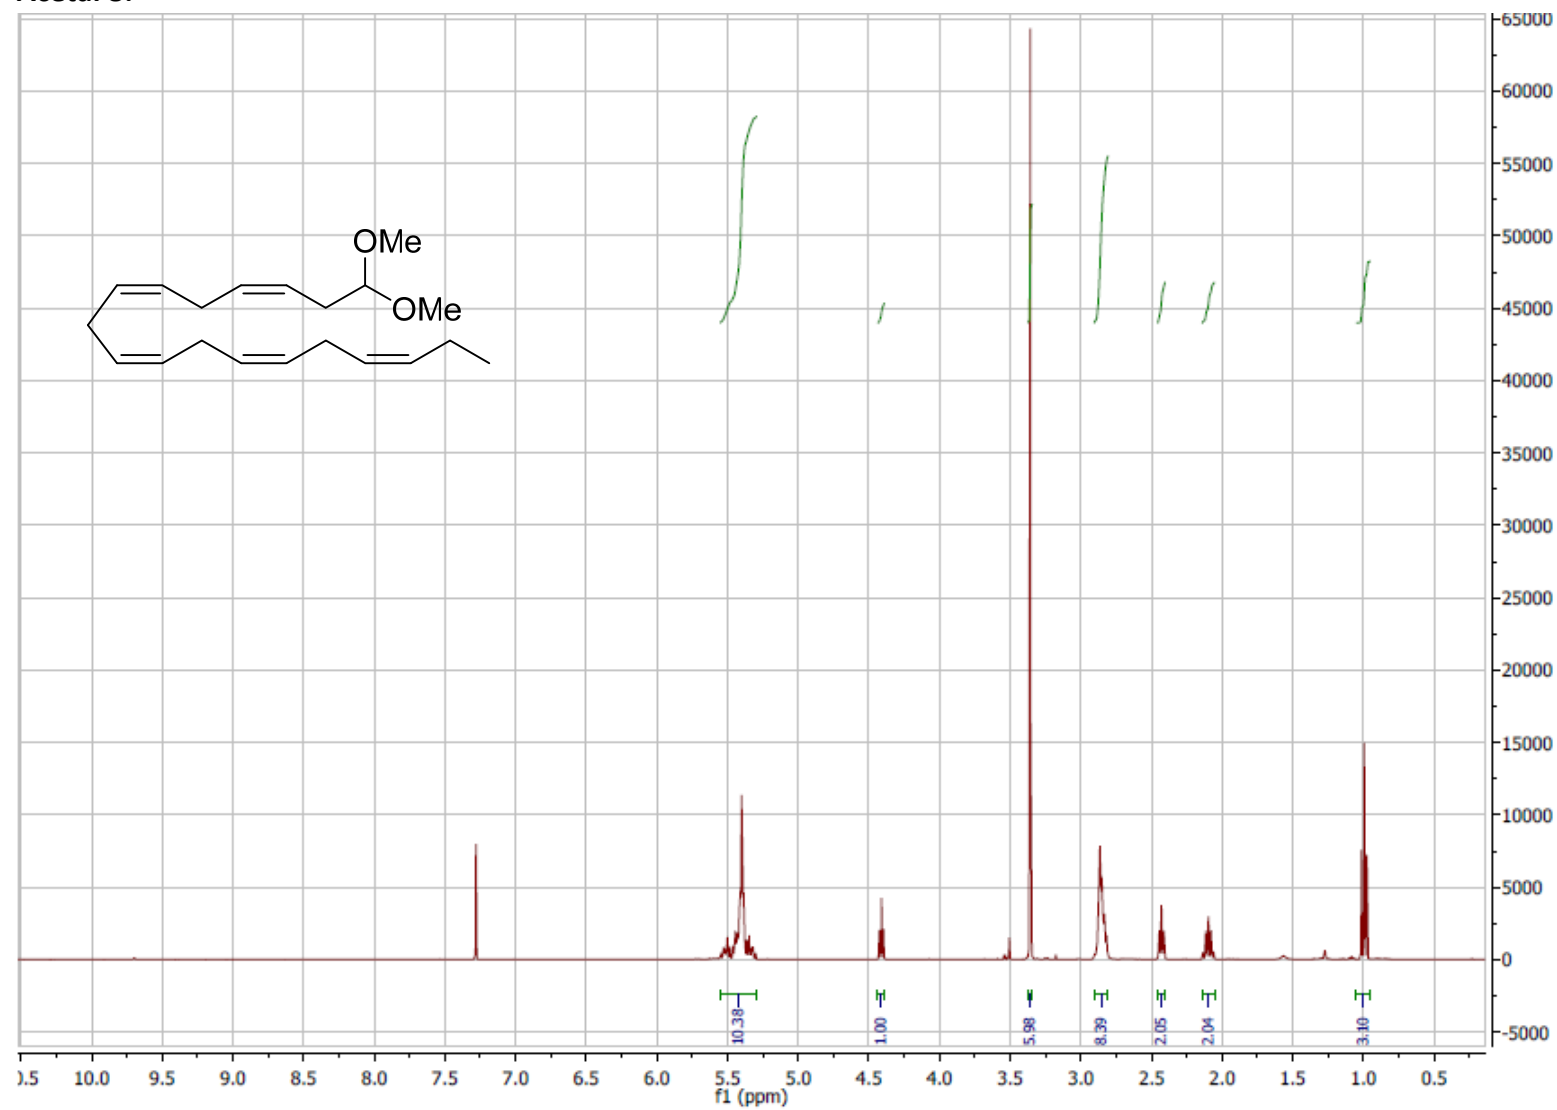

Figure S7  $^1\text{H}$  NMR spectrum of acetal 8.

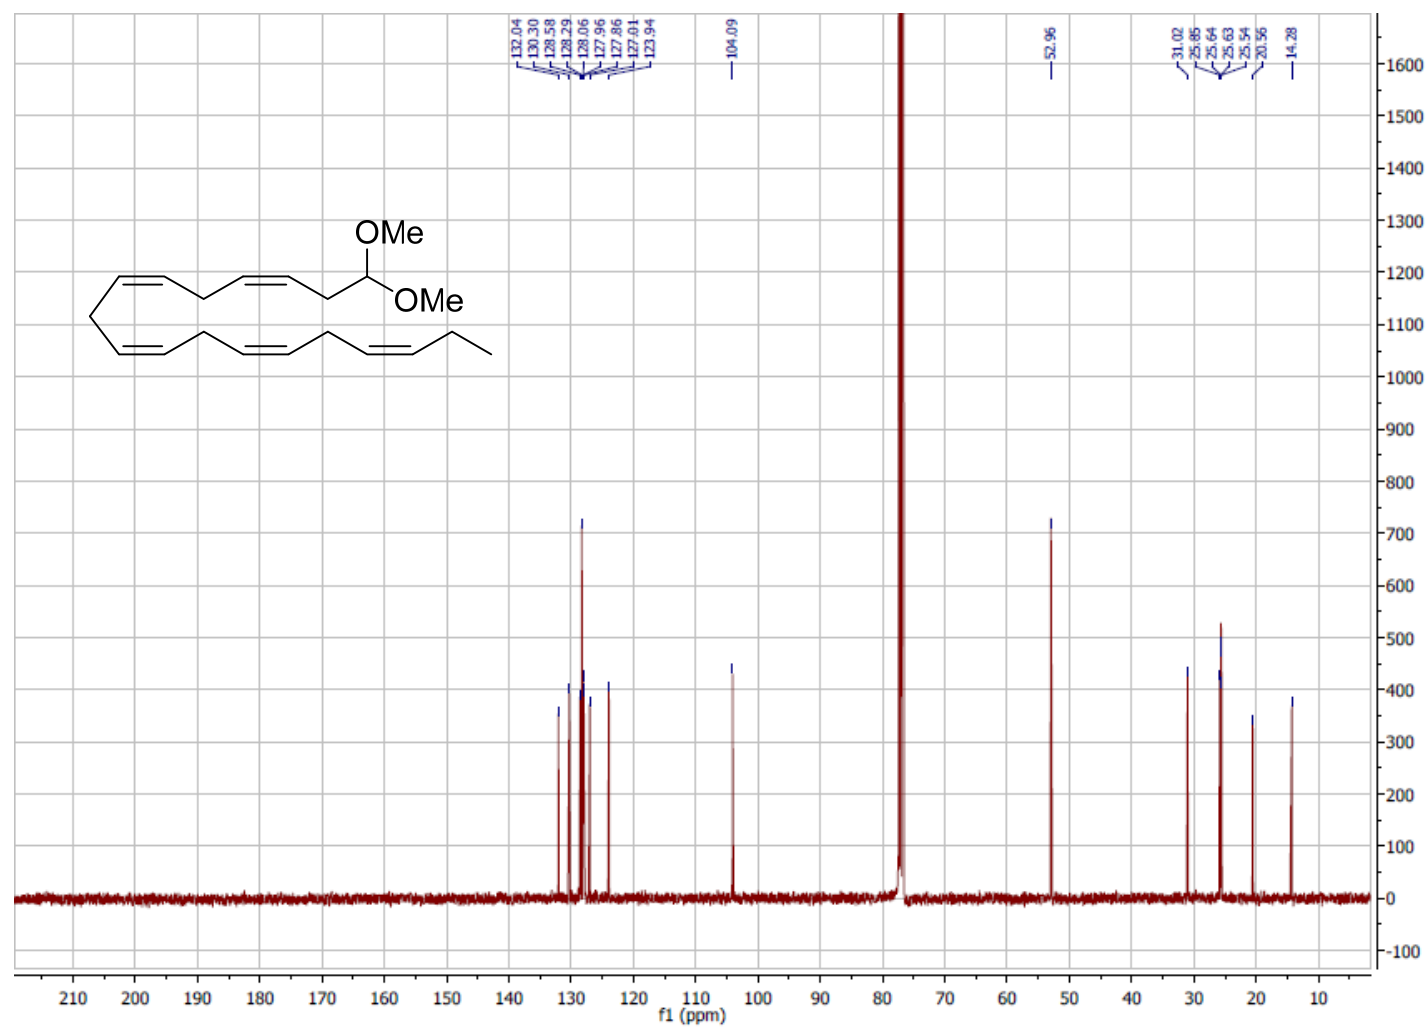

Figure S8 <sup>13</sup>C NMR spectrum of acetal 8.

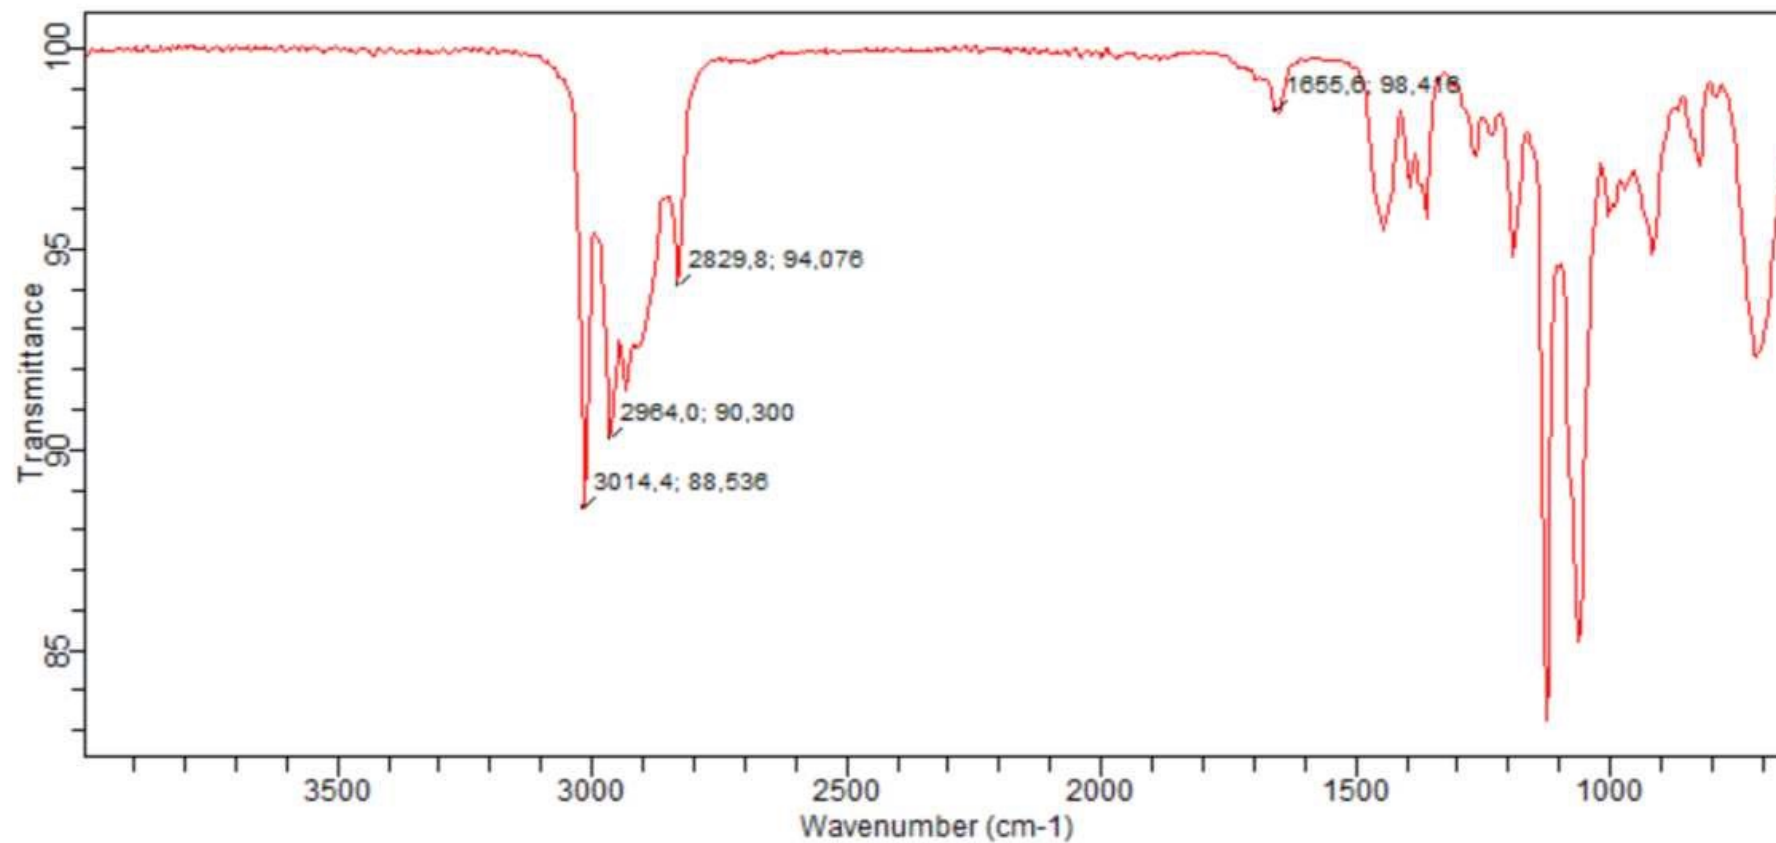

Figure S9 IR spectrum of acetal 8.

[illegible]

S11



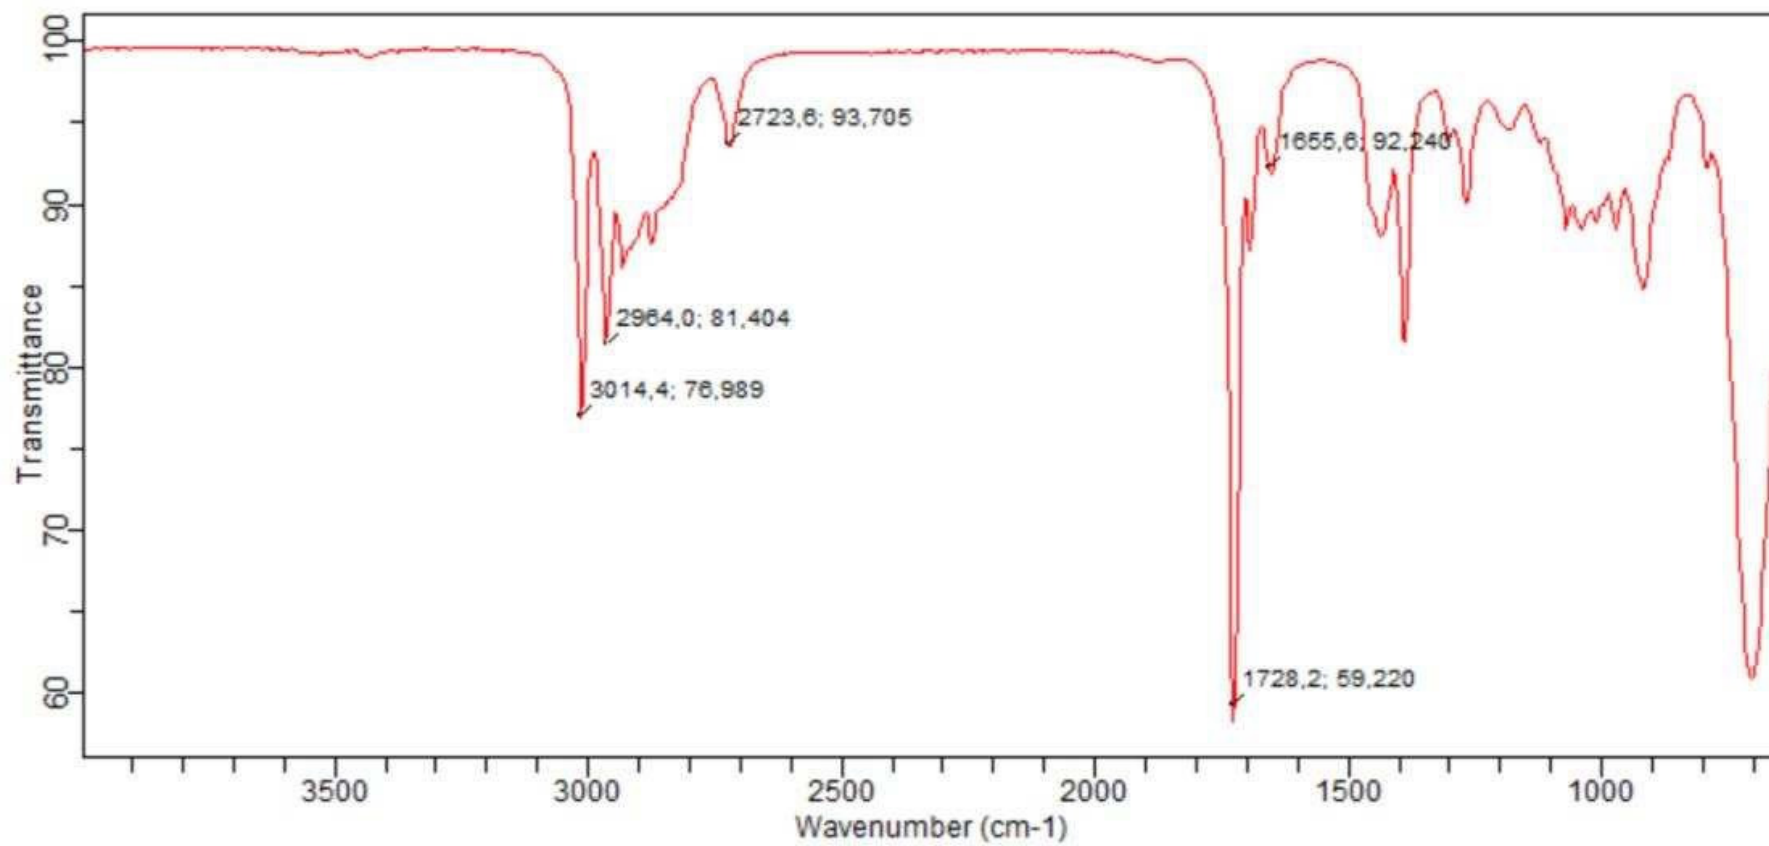

Figure S12 IR spectrum of aldehyde 27

**Auxiliary 5b:**

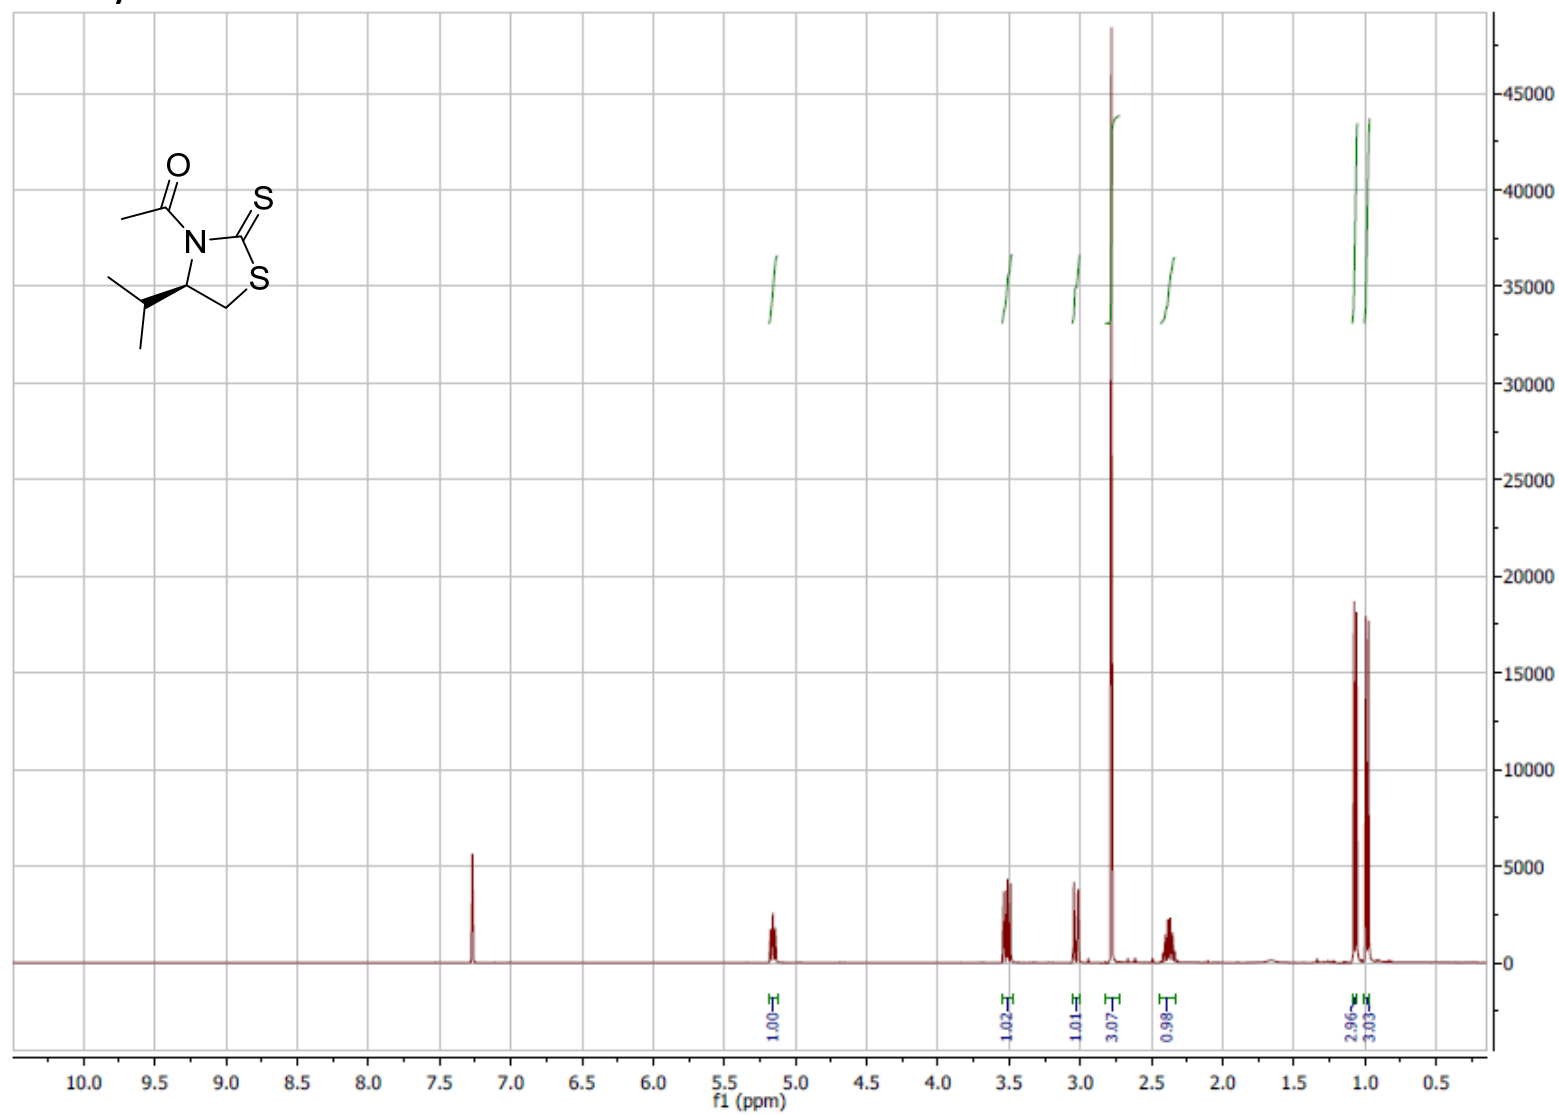

Figure S13 <sup>1</sup>H NMR spectrum of auxiliary 5b.

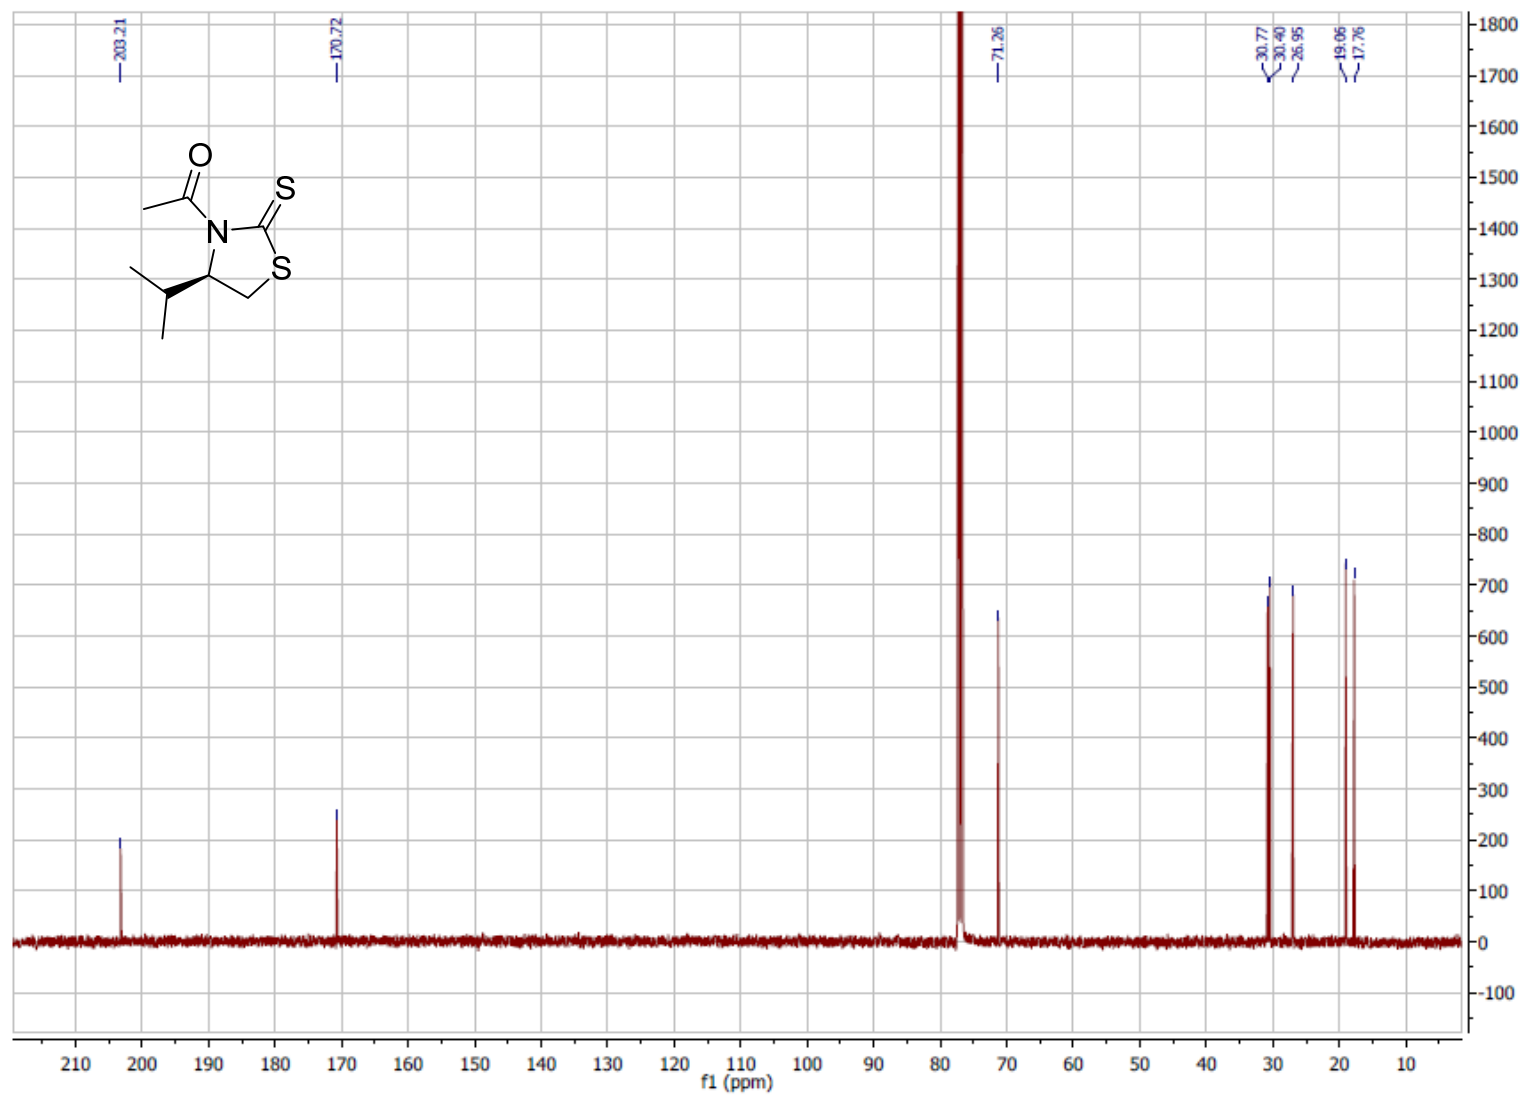

Figure S14 <sup>13</sup>C NMR spectrum of auxiliary 5b.

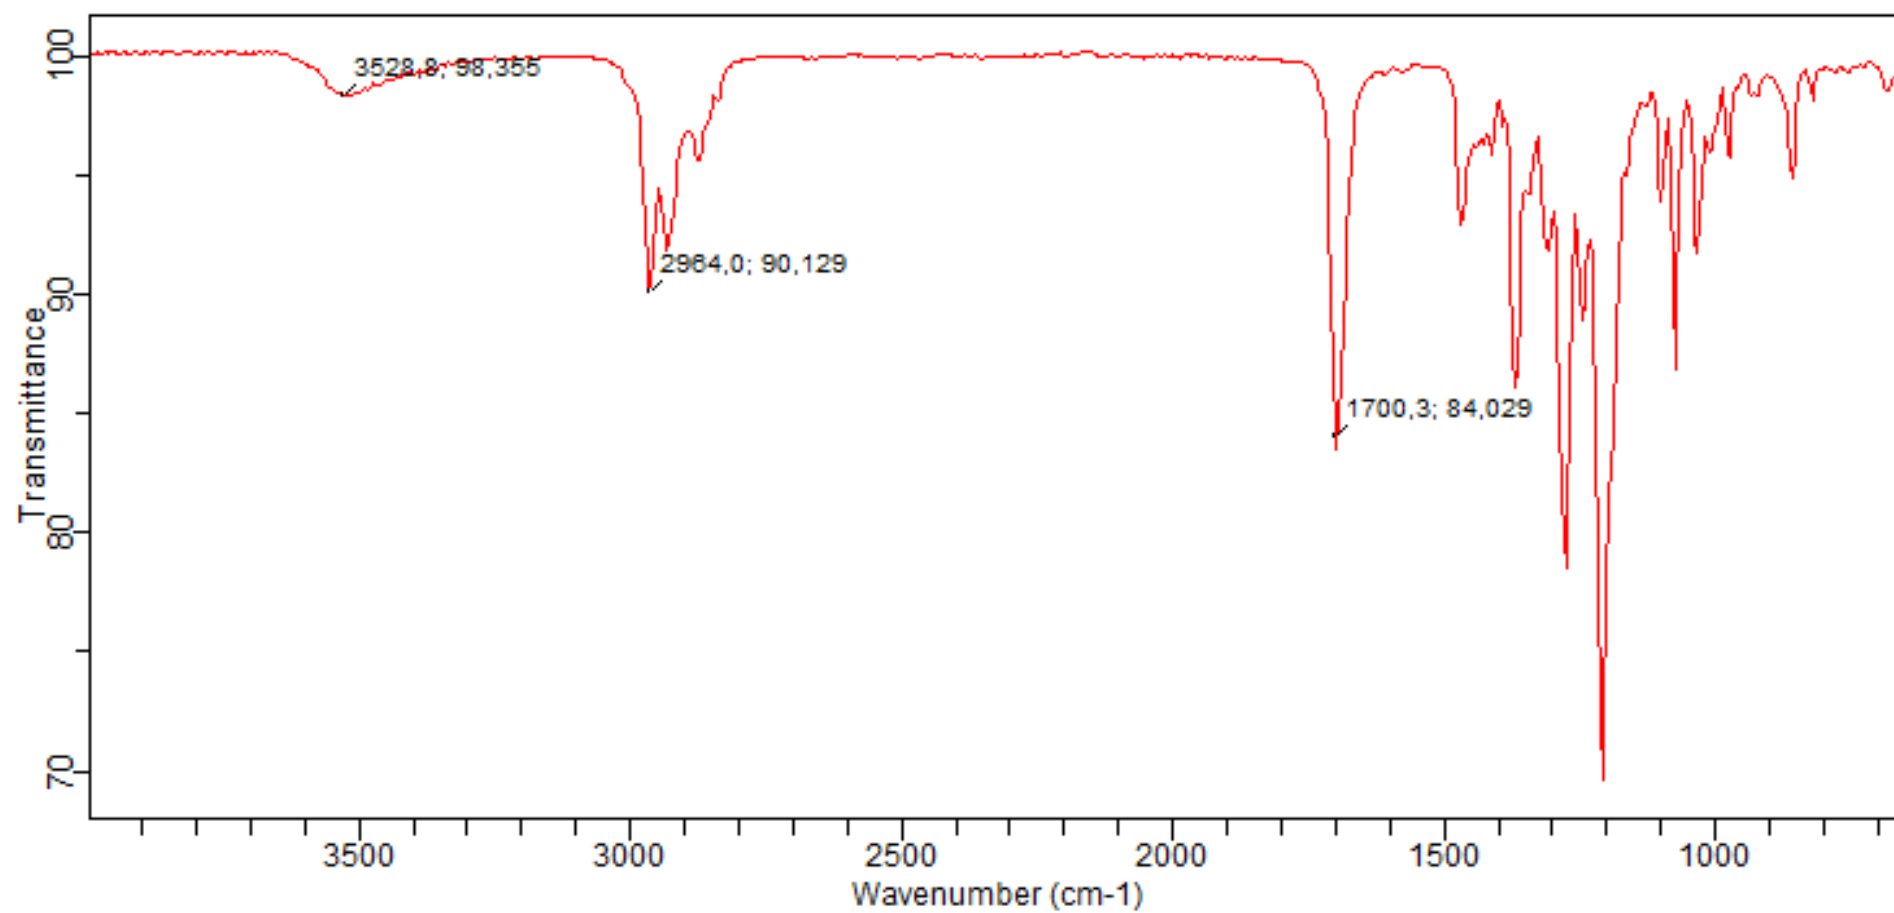

Figure S15 IR spectrum of auxiliary 5b.

**Aldol products 9b:**

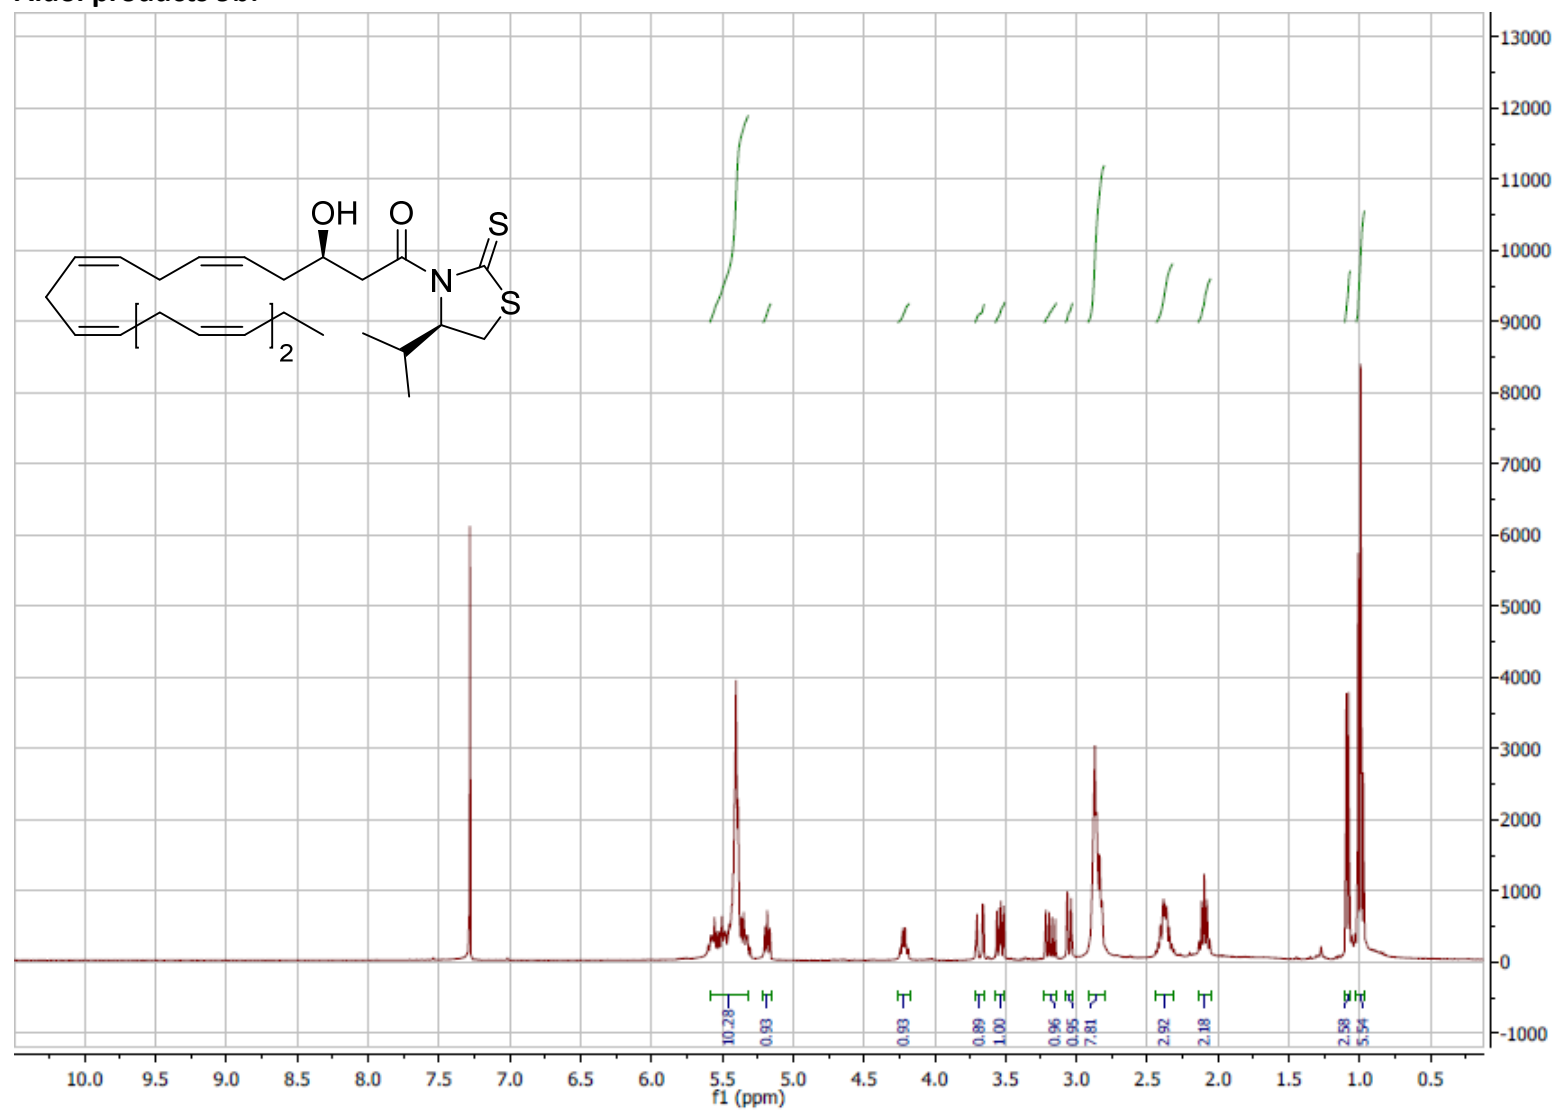

Figure S16  $^1\text{H}$  NMR spectrum of major aldol product (R)-9b

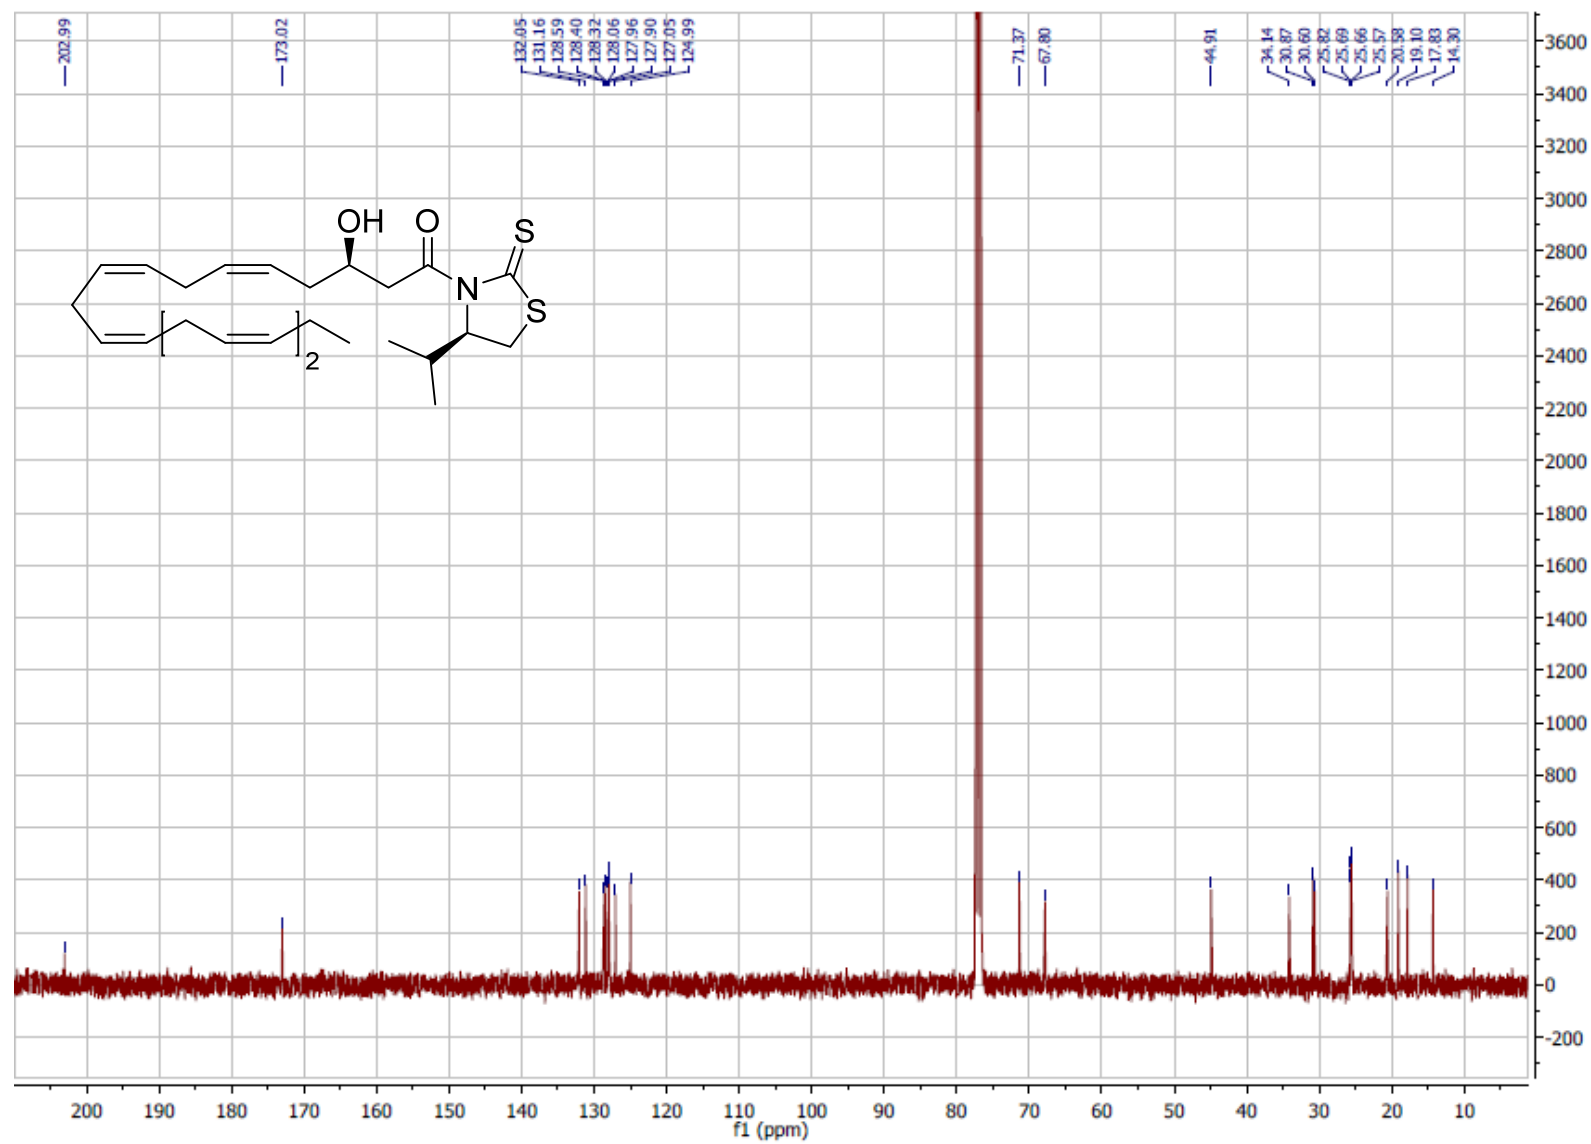

Figure S17 <sup>13</sup>C NMR spectrum of major aldol product (R)-9b.

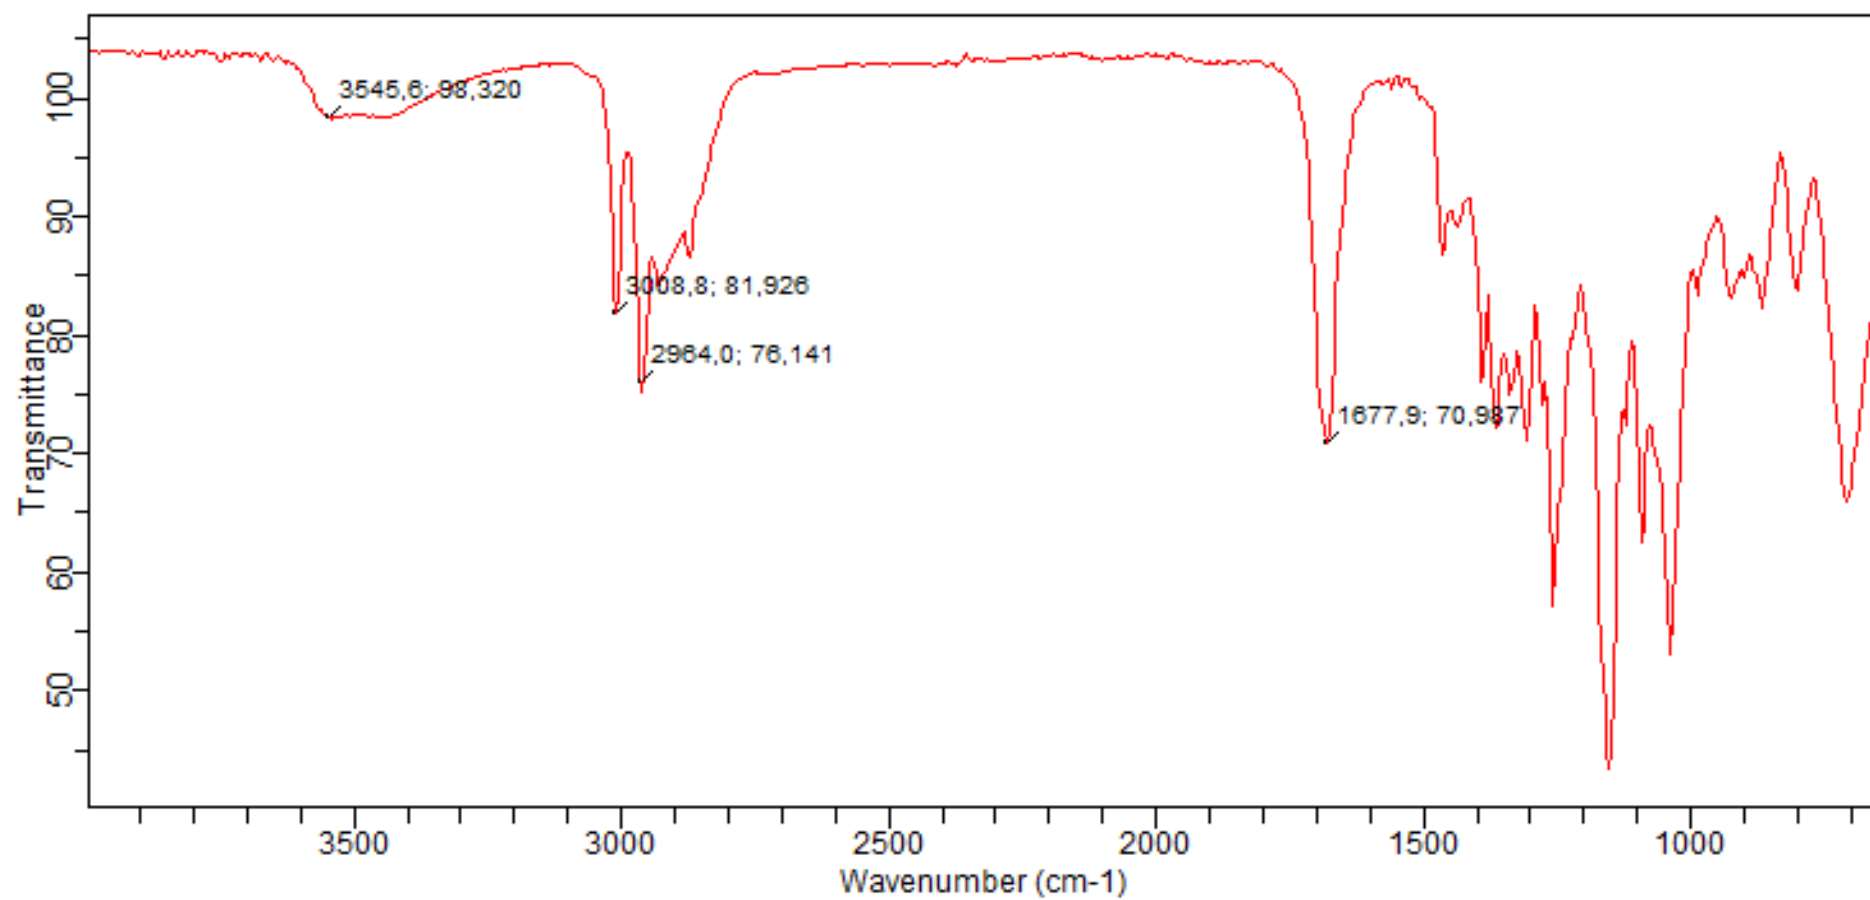

Figure S18 IR spectrum of major aldol product (R)-9b.

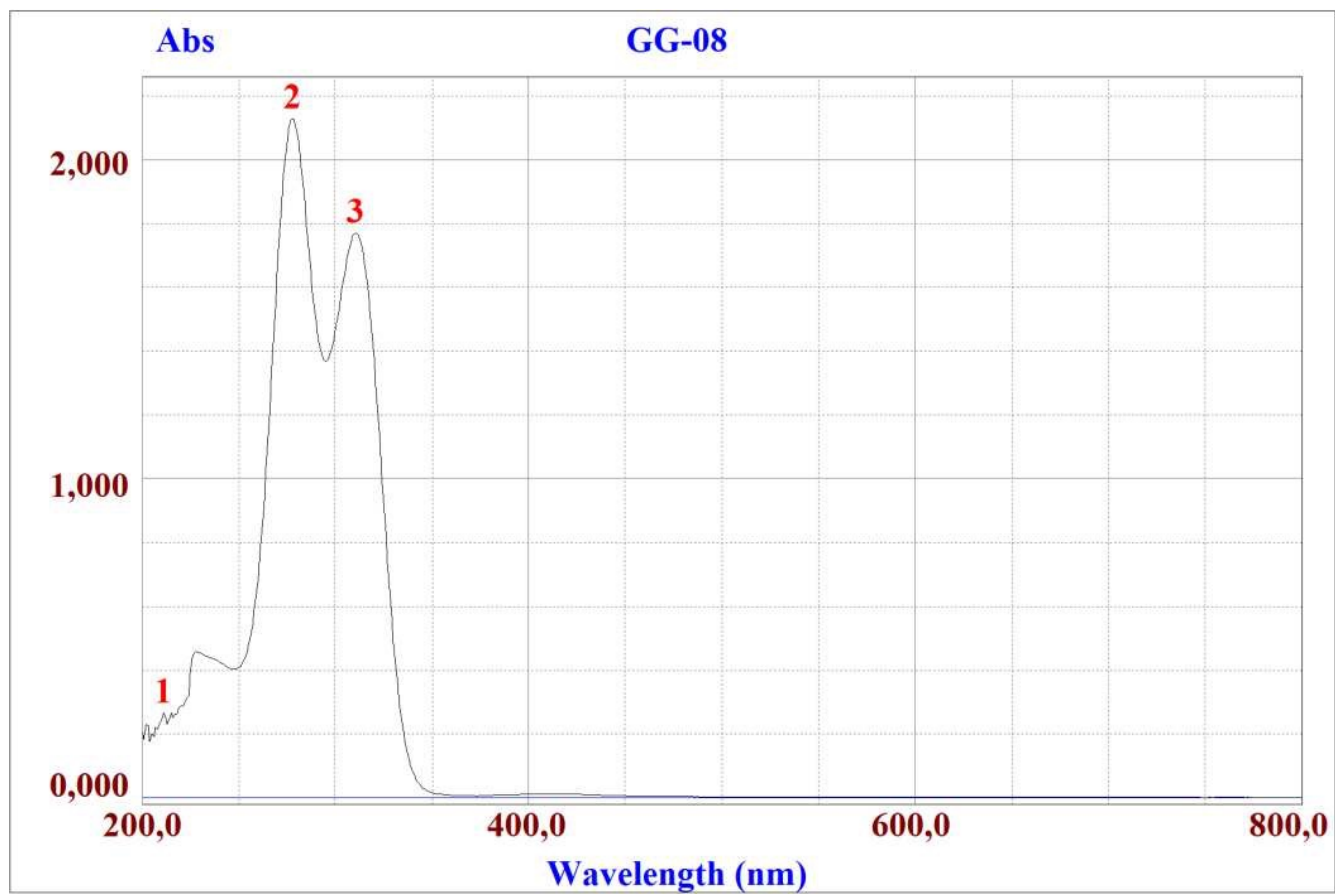

Figure S19 UV spectrum of major aldol product (R)-9b.

## Elemental Composition Report

Page 1

### Single Mass Analysis

Tolerance = 10.0 PPM / DBE: min = -1.5, max = 50.0

Isotope cluster parameters: Separation = 1.0 Abundance = 1.0%

Monoisotopic Mass, Odd and Even Electron Ions

32 formula(e) evaluated with 1 results within limits (up to 50 closest results for each mass)

GG-Ma 461,24

JN2017112806 248 (4.981)

Voltage EI+  
207

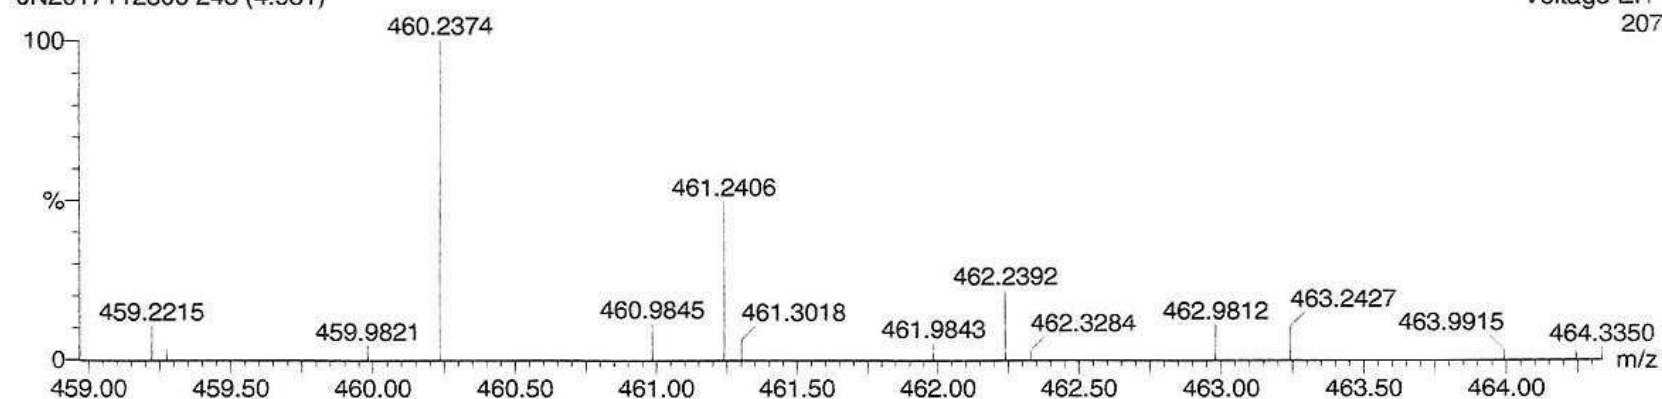

Minimum: -1.5  
Maximum: 200.0 10.0 50.0

| Mass     | Calc. Mass | mDa  | PPM  | DBE | Score | Formula         |
|----------|------------|------|------|-----|-------|-----------------|
| 461.2406 | 461.2422   | -1.6 | -3.5 | 8.0 | 1     | C26 H39 N O2 S2 |

Figure S20 MS of major aldol product (R)-9b.



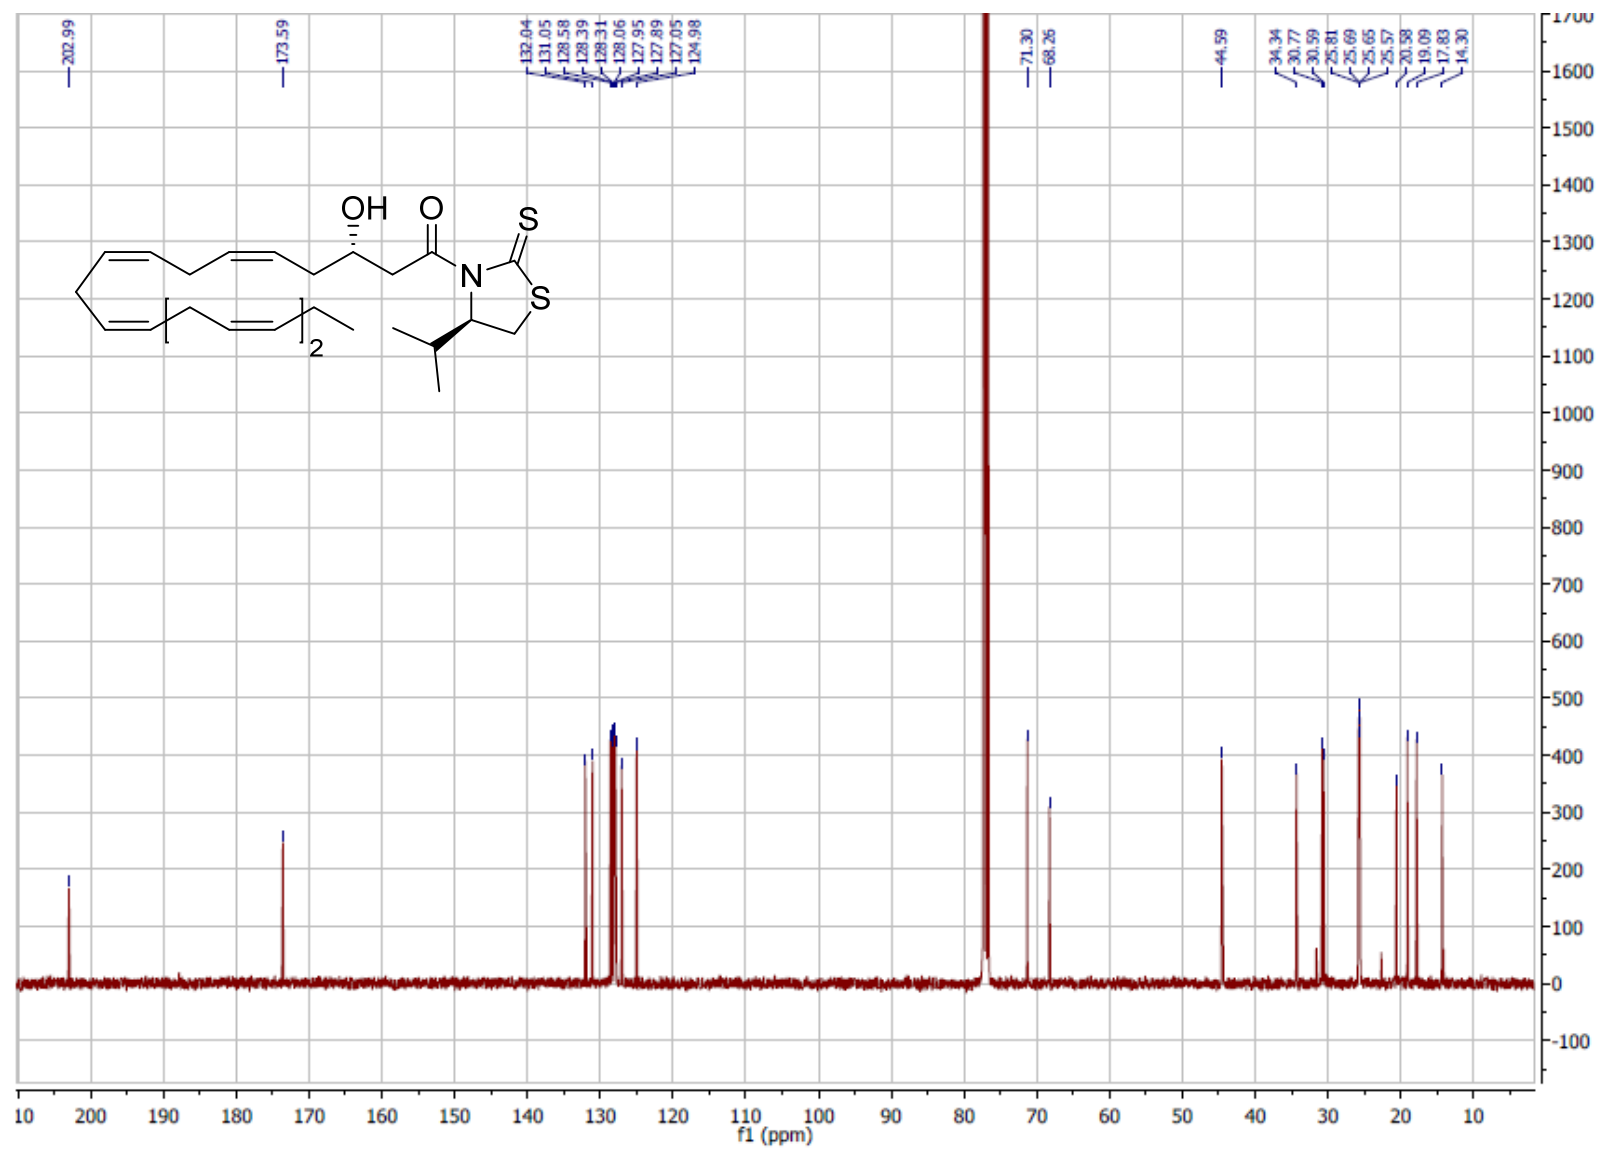

Figure S22 <sup>13</sup>C NMR spectrum of minor aldol product (S)-9b.

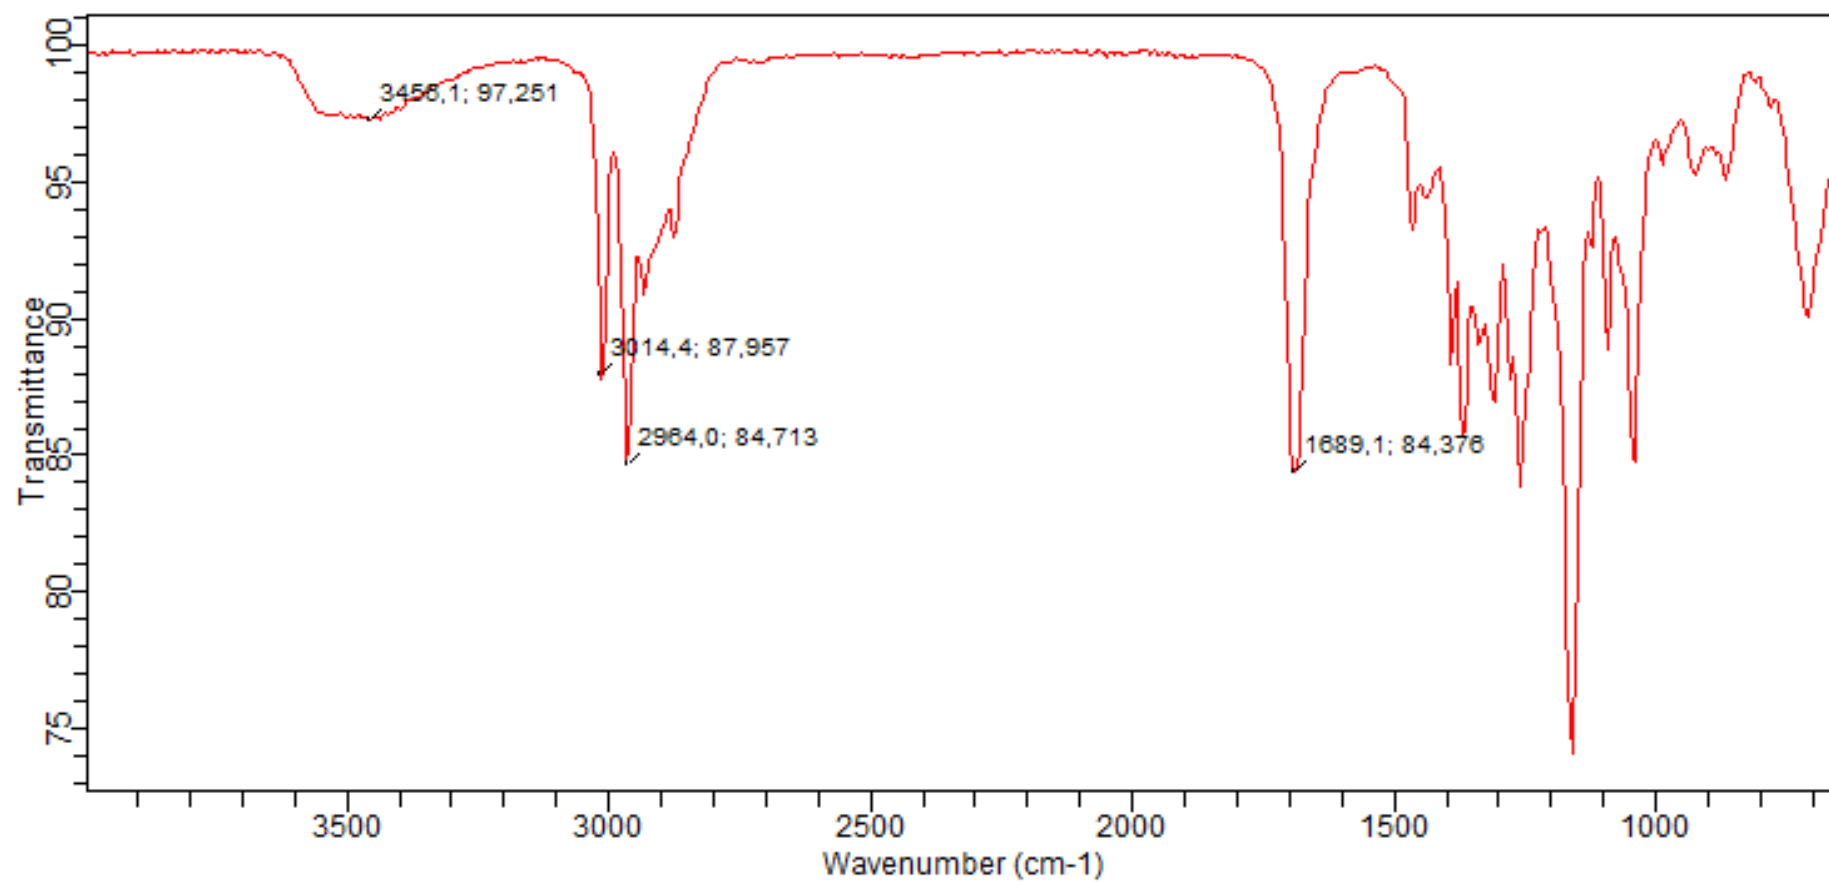

Figure S23 IR spectrum of minor aldol product (S)-9b.

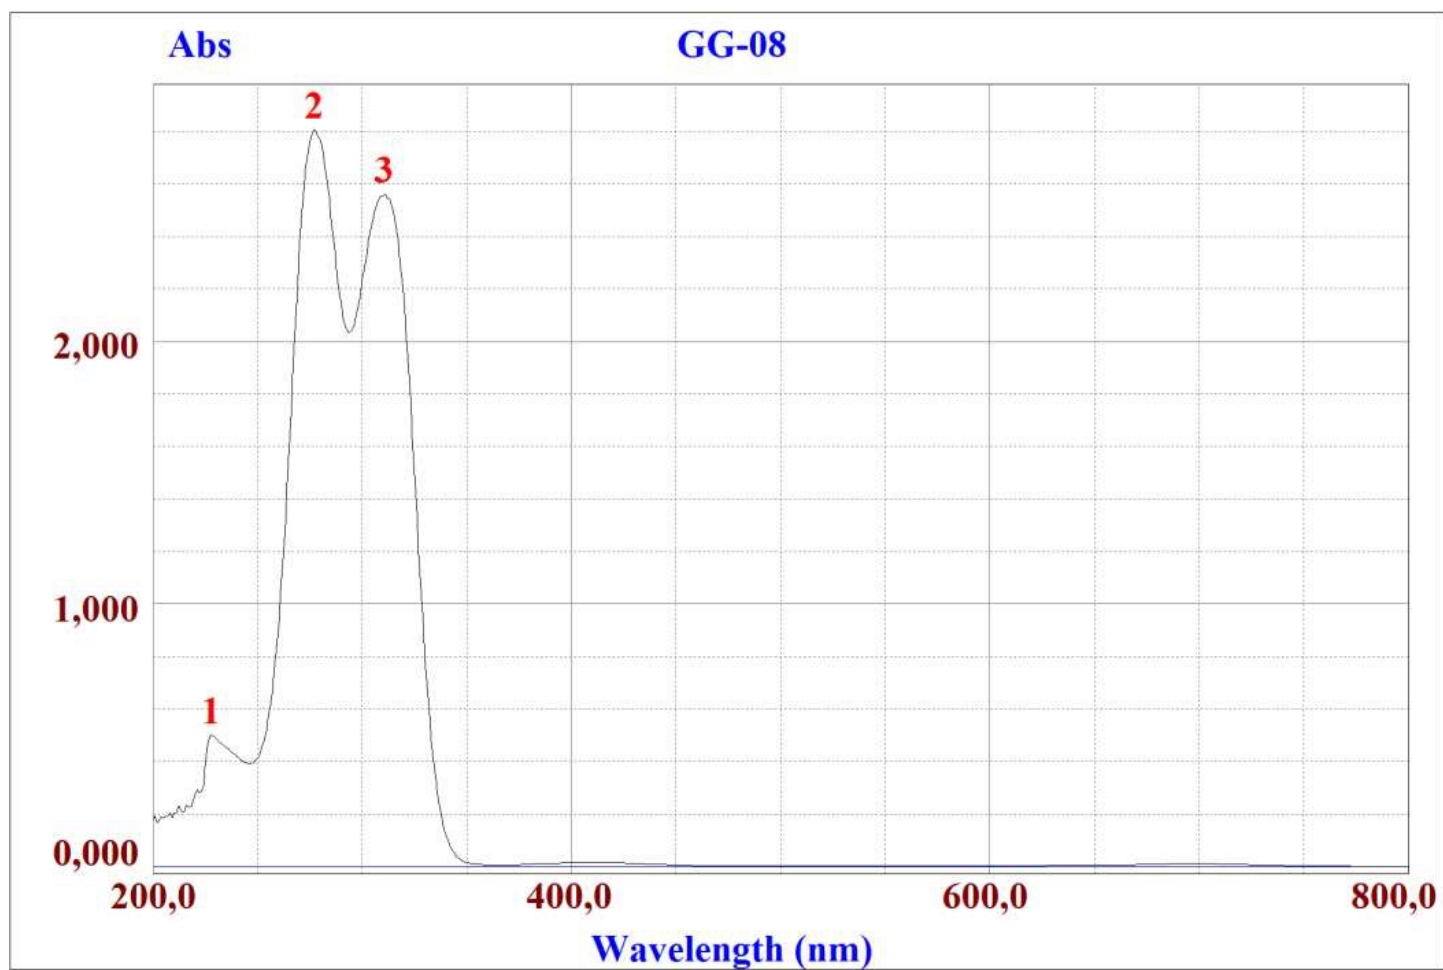

Figure S24 UV spectrum of minor aldol product (S)-9b.

## Elemental Composition Report

Page 1

### Single Mass Analysis

Tolerance = 10.0 PPM / DBE: min = -1.5, max = 50.0

Isotope cluster parameters: Separation = 1.0 Abundance = 1.0%

Monoisotopic Mass, Odd and Even Electron Ions

32 formula(e) evaluated with 1 results within limits (up to 50 closest results for each mass)

GG-Mi 461.24

JN2017112805 145 (2.912)

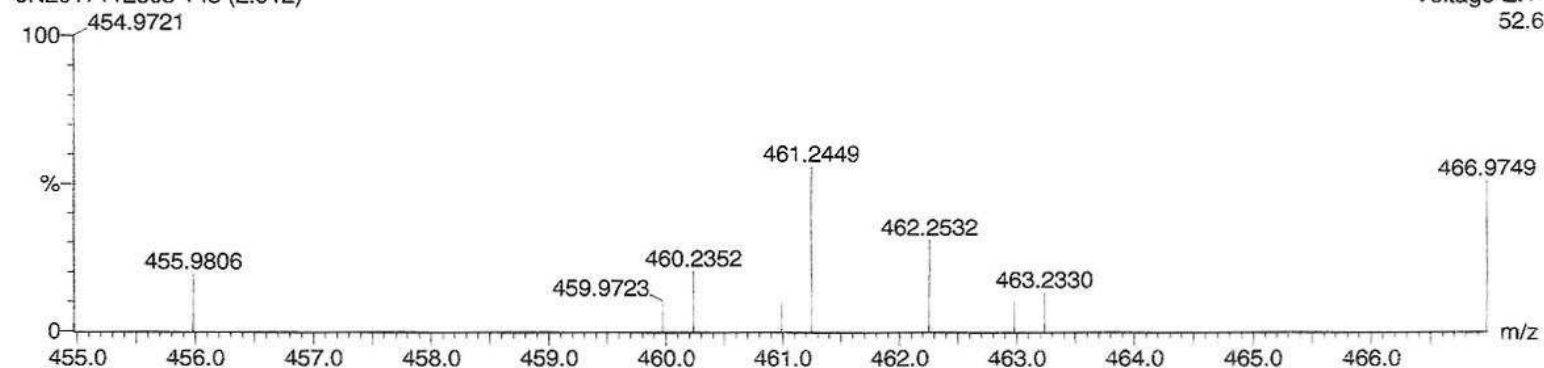

Voltage EI+  
52.6

Minimum: -1.5  
Maximum: 200.0 10.0 50.0

| Mass     | Calc. Mass | mDa | PPM | DBE | Score | Formula         |
|----------|------------|-----|-----|-----|-------|-----------------|
| 461.2449 | 461.2422   | 2.7 | 5.8 | 8.0 | 1     | C26 H39 N O2 S2 |

Figure S25 HRMS of minor aldol product (S)-9b.

**TBS protected aldol product 10:**

GG-08.40.fid Major

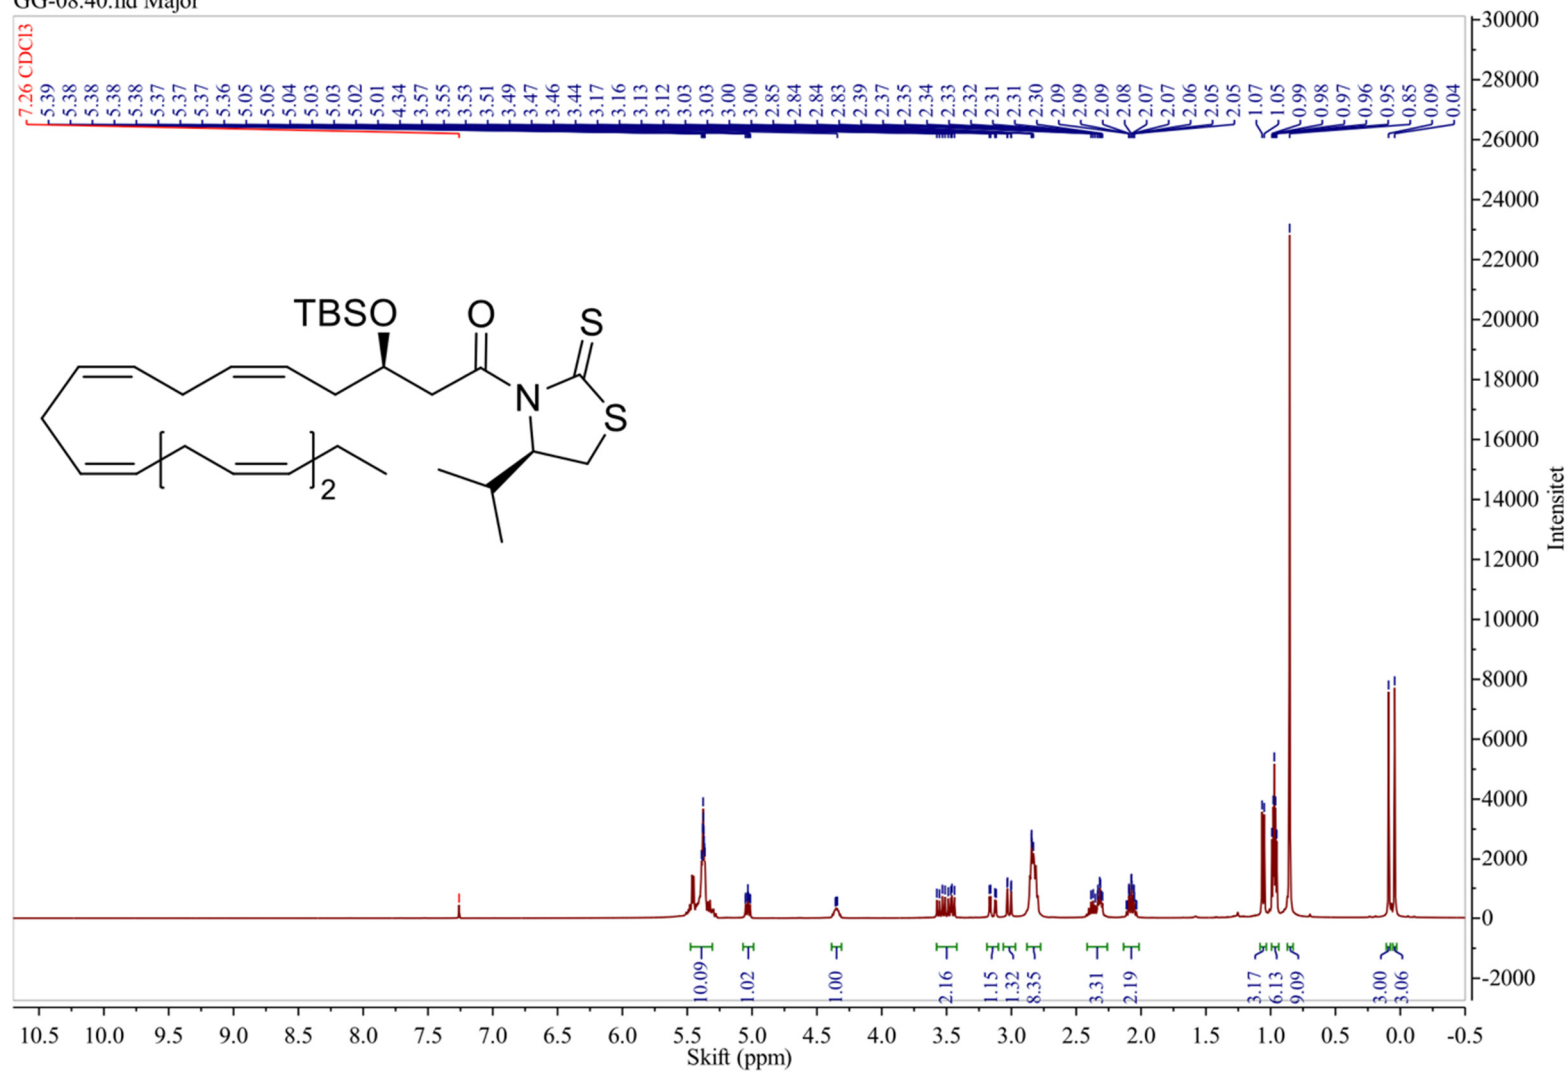

Figure S26 1H NMR spectrum of TBS protected aldol product

GG-08.41.fid Major

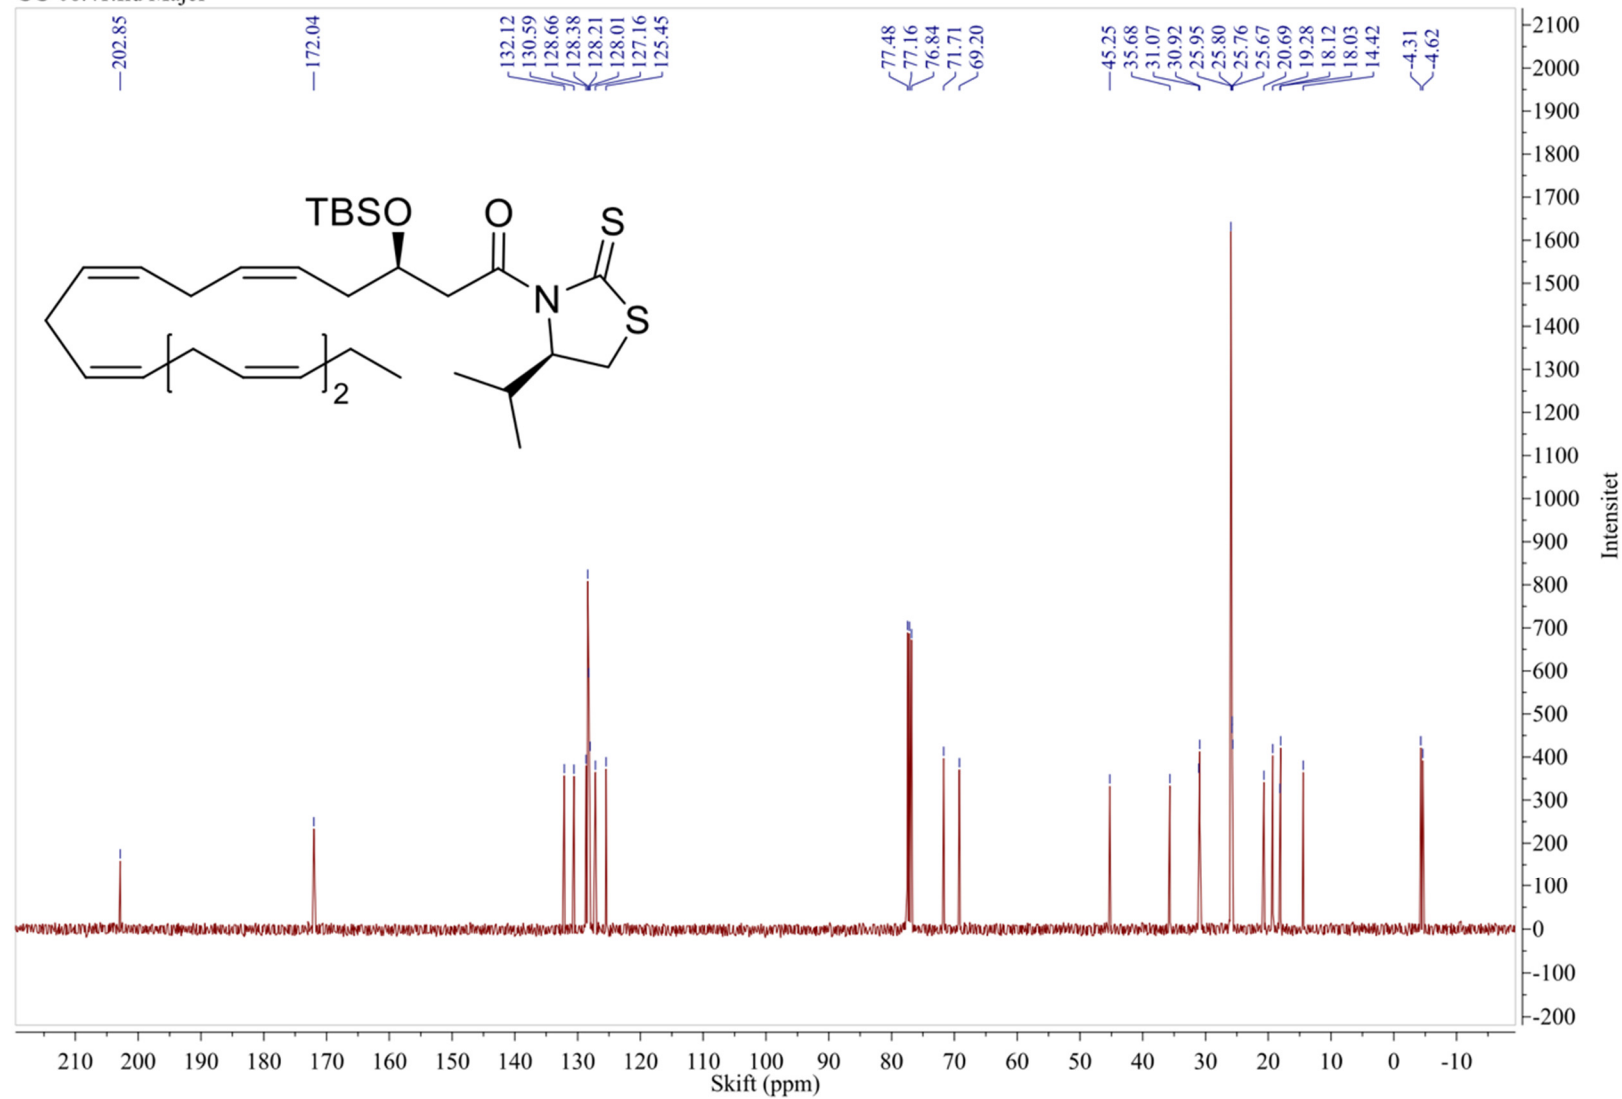

Figure S27 13C NMR spectrum of TBS protected aldol product

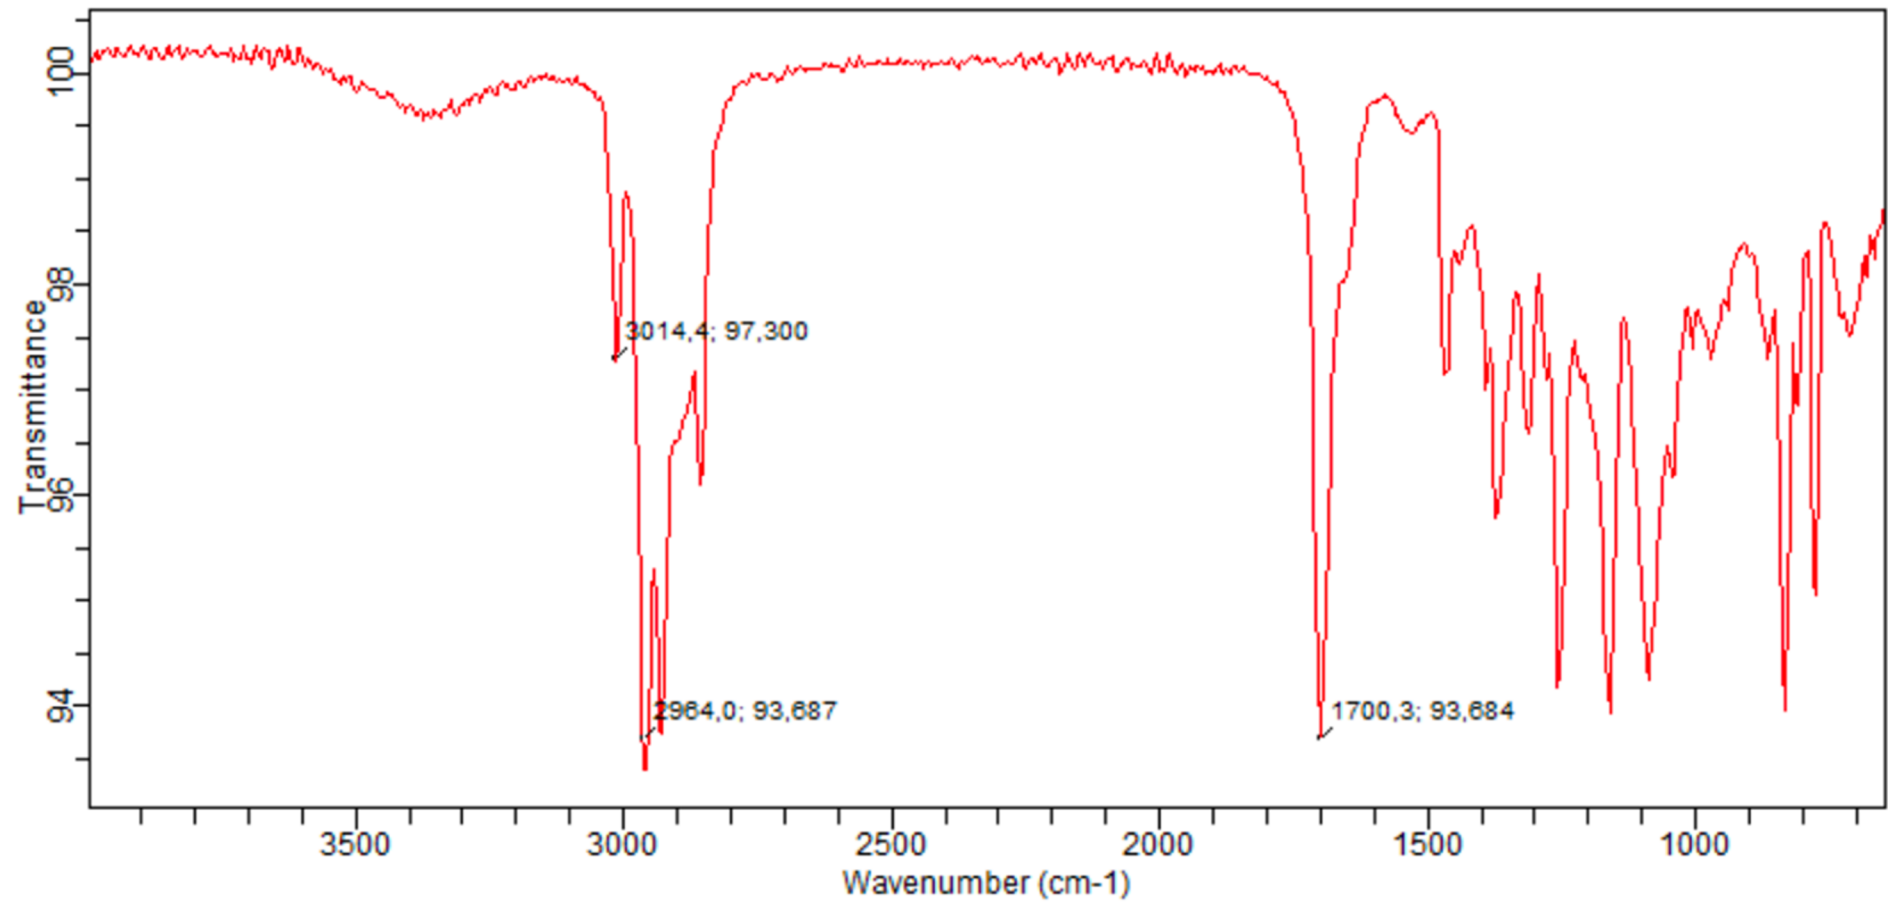

Figure S28 IR spectrum of TBS protected aldol product

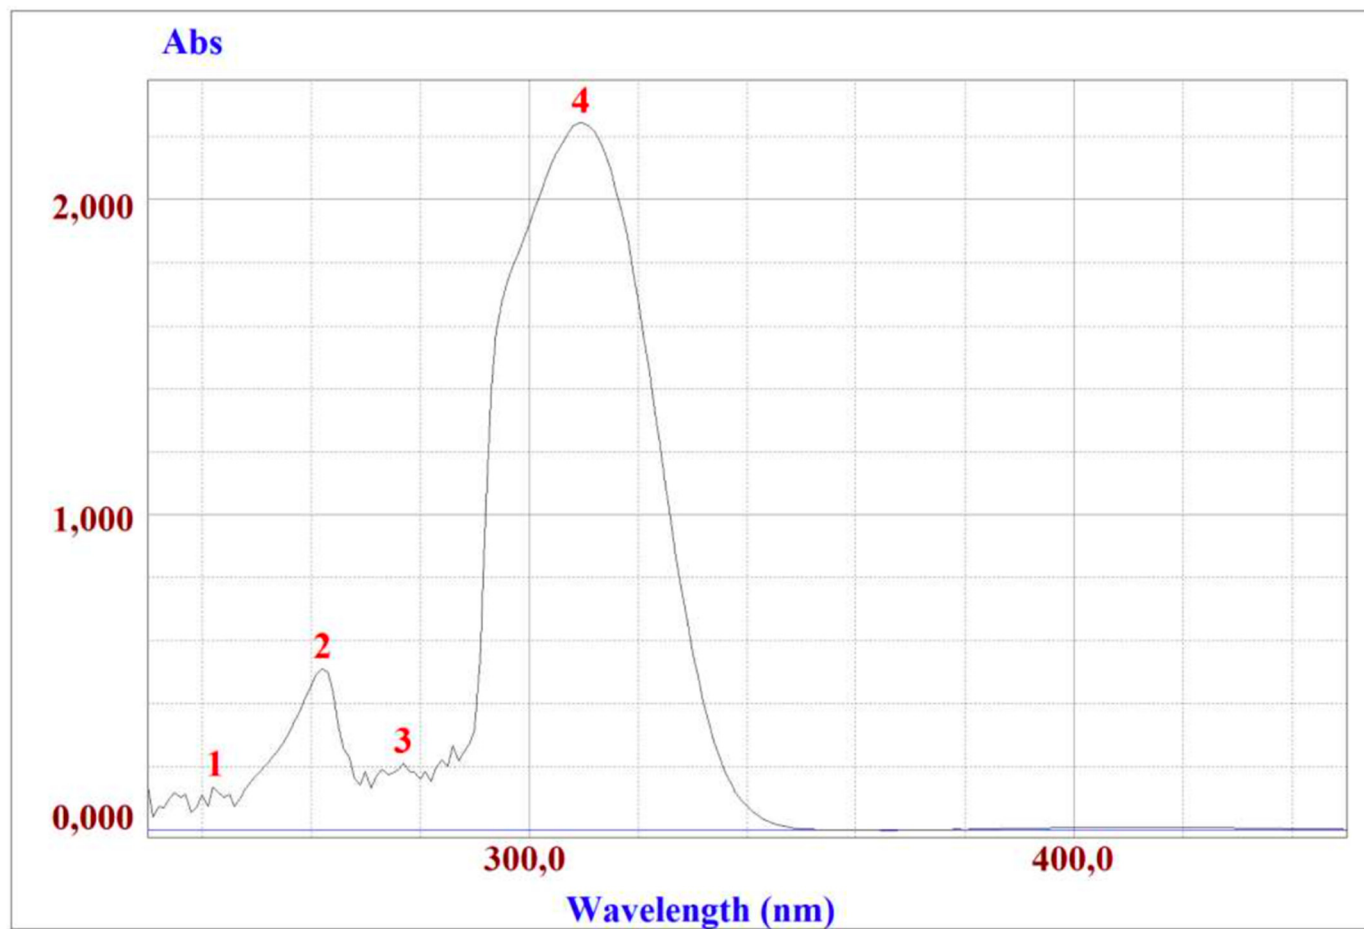

| <u>No.</u> | <u>Peak Type</u> | <u>Position</u> | <u>Height</u> |
|------------|------------------|-----------------|---------------|
| 1          | Peak             | 242,3           | 0,136         |
| 2          | Peak             | 262,2           | 0,513         |
| 3          | Peak             | 276,9           | 0,212         |
| 4          | Peak             | 309,5           | 2,244         |

Figure S29 UV spectrum of TBS protected aldol product

## Elemental Composition Report

Page 1

### Single Mass Analysis

Tolerance = 10.0 PPM / DBE: min = -1.5, max = 50.0

Isotope cluster parameters: Separation = 1.0 Abundance = 1.0%

Monoisotopic Mass, Odd and Even Electron Ions

572 formula(e) evaluated with 9 results within limits (up to 50 closest results for each mass)

GG-15

DEMHL2018022808 133 (2.669)

Voltage EI+  
52.3

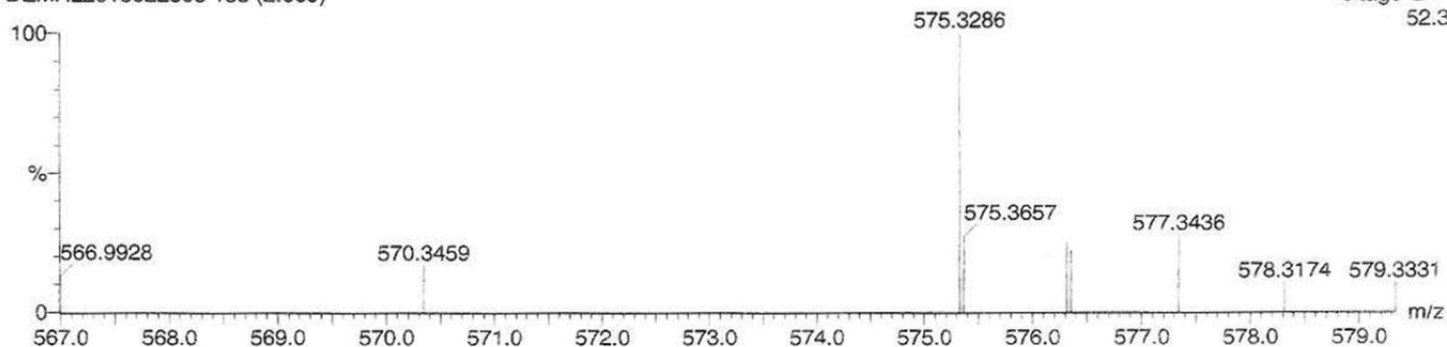

Minimum: -1.5  
Maximum: 200.0 10.0 50.0

| Mass     | Calc. Mass | mDa  | PPM  | DBE  | Score | Formula            |
|----------|------------|------|------|------|-------|--------------------|
| 575.3286 | 575.3287   | -0.1 | -0.2 | 8.0  | 3     | C32 H53 N O2 S2 Si |
|          | 575.3281   | 0.5  | 0.9  | 9.0  | 6     | C32 H49 N O6 S     |
|          | 575.3260   | 2.6  | 4.5  | 3.5  | 2     | C29 H55 O5 S2 Si   |
|          | 575.3314   | -2.8 | -4.9 | 22.5 | 9     | C43 H43 O          |
|          | 575.3314   | -2.8 | -4.9 | 4.0  | 1     | C29 H53 N O6 S2    |
|          | 575.3256   | 3.0  | 5.3  | 13.0 | 5     | C36 H49 N O S2     |
|          | 575.3253   | 3.3  | 5.7  | 13.0 | 7     | C35 H49 N O2 S Si  |
|          | 575.3247   | 3.9  | 6.8  | 14.0 | 8     | C35 H45 N O6       |
|          | 575.3229   | 5.7  | 9.9  | 8.5  | 4     | C33 H51 O4 S2      |

Figure S30 MS of TBS protected aldol product

## GG-11.10.fid

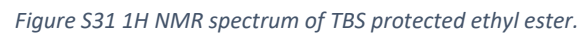

GG-11.11.fid

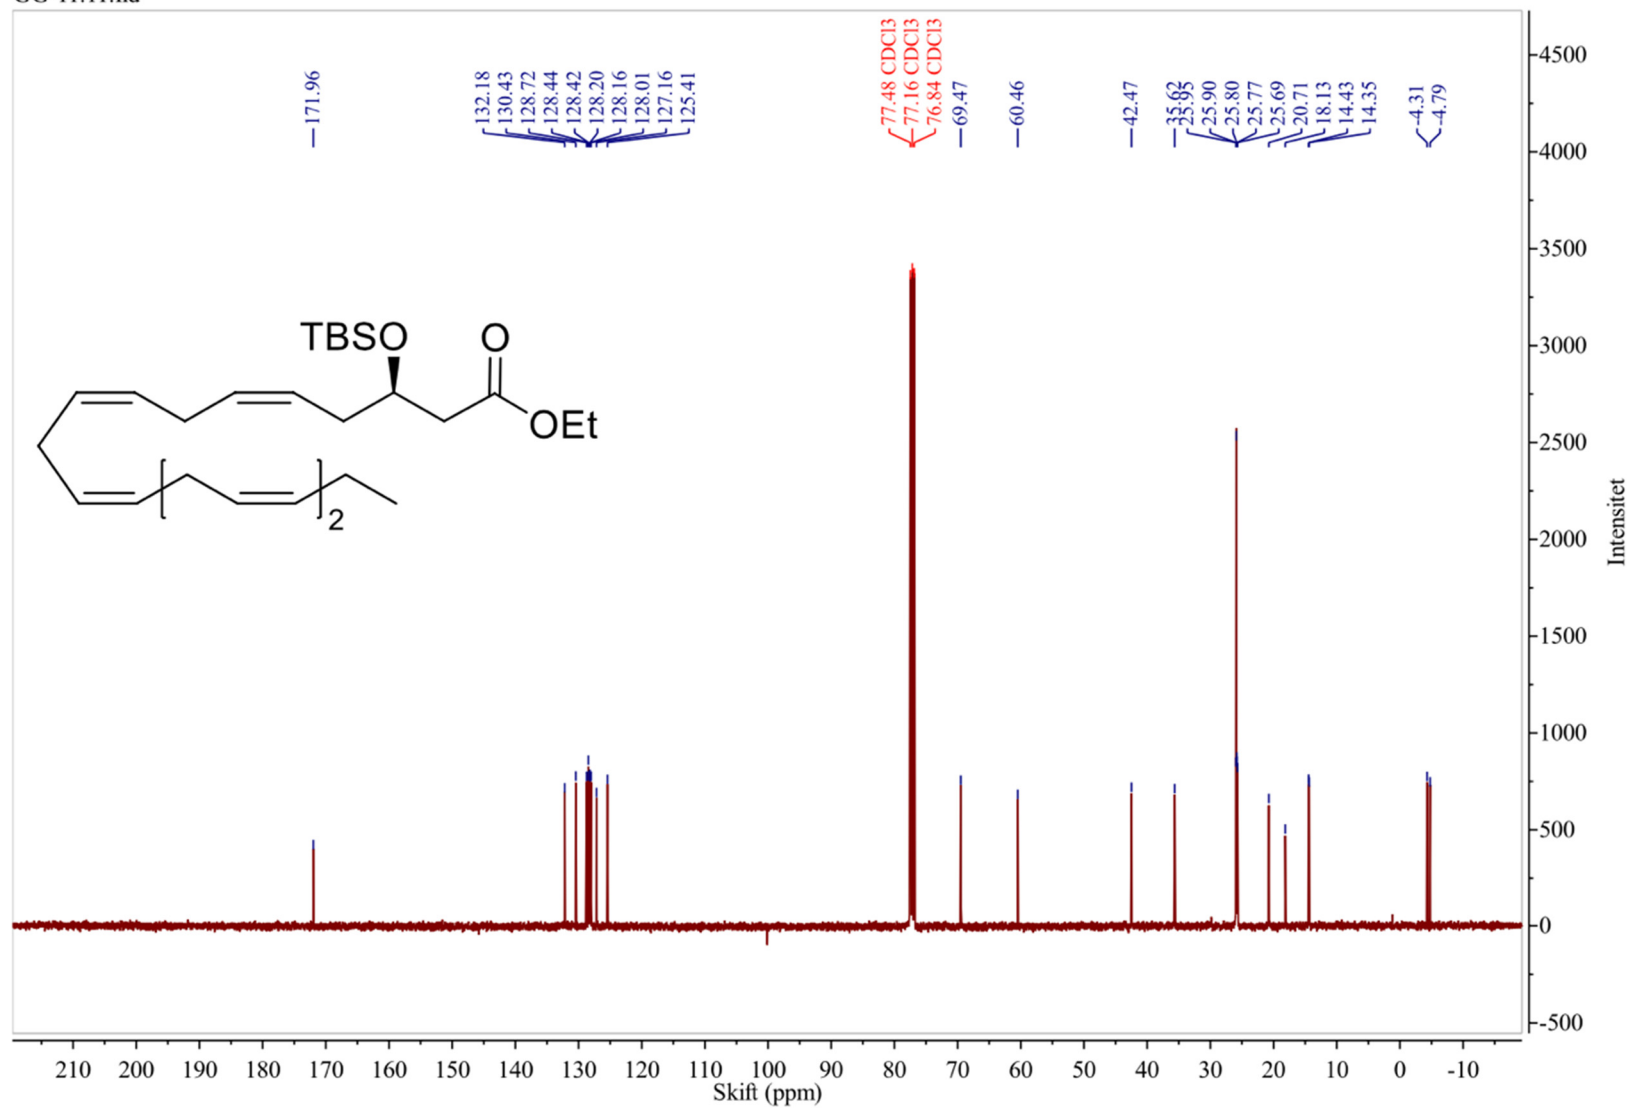

Figure S32 <sup>13</sup>C NMR spectrum of TBS protected ethyl ester.

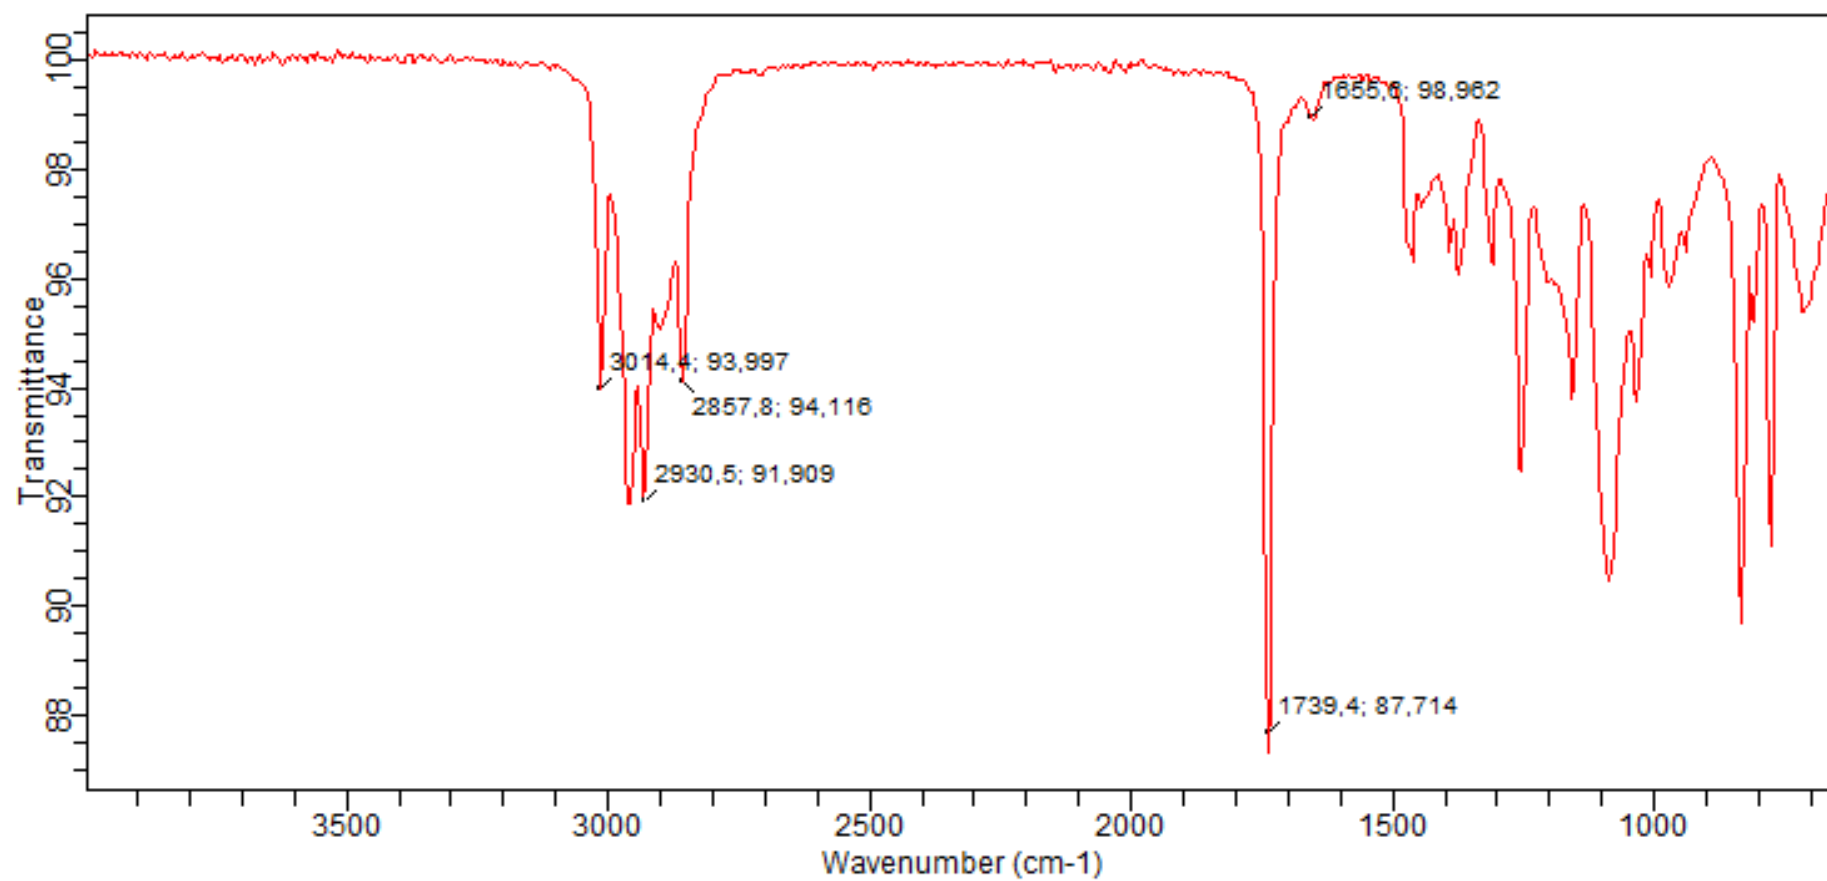

Figure S33 IR spectrum of TBS protected ethyl ester.

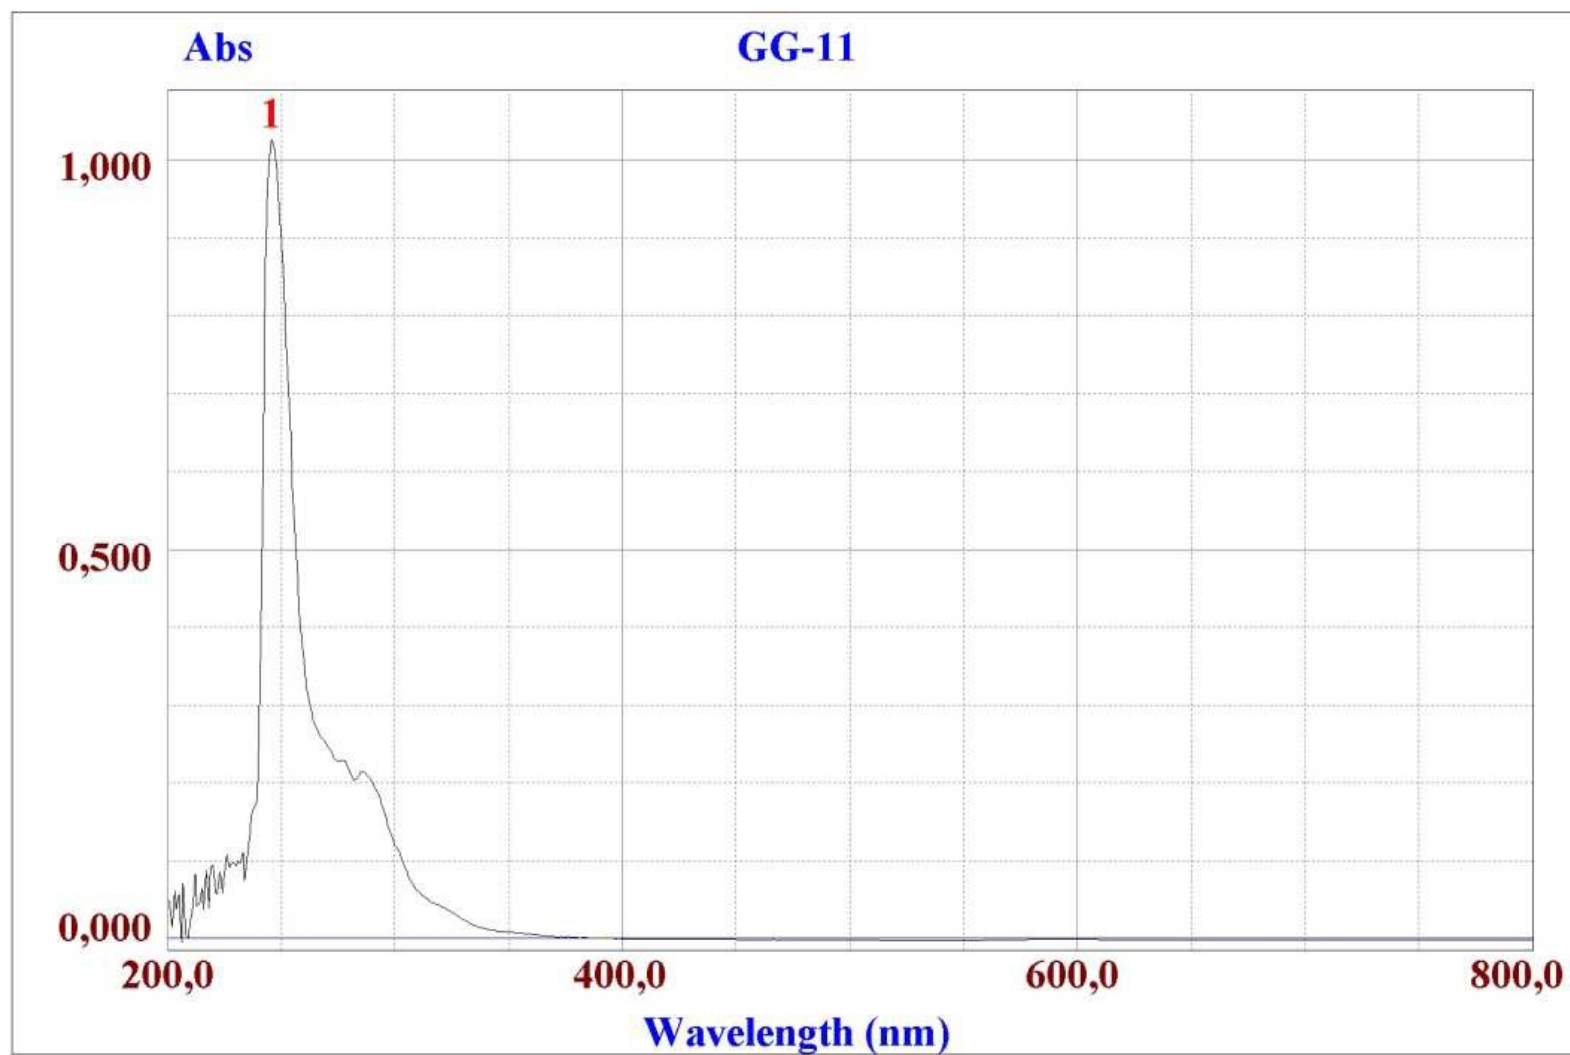

| <u>No.</u> | <u>Peak Type</u> | <u>Position</u> | <u>Height</u> |
|------------|------------------|-----------------|---------------|
| 1          | Peak             | 245,8           | 1,027         |

Figure S34 UV spectrum of TBS protected ethyl ester.

## Elemental Composition Report

Page 1

### Single Mass Analysis

Tolerance = 10.0 PPM / DBE: min = -1.5, max = 50.0

Isotope cluster parameters: Separation = 1.0 Abundance = 1.0%

Monoisotopic Mass, Odd and Even Electron Ions

83 formula(e) evaluated with 2 results within limits (up to 50 closest results for each mass)

GG-17

DEMHL2018022809 264 (5.302)

Voltage EI+  
71.3

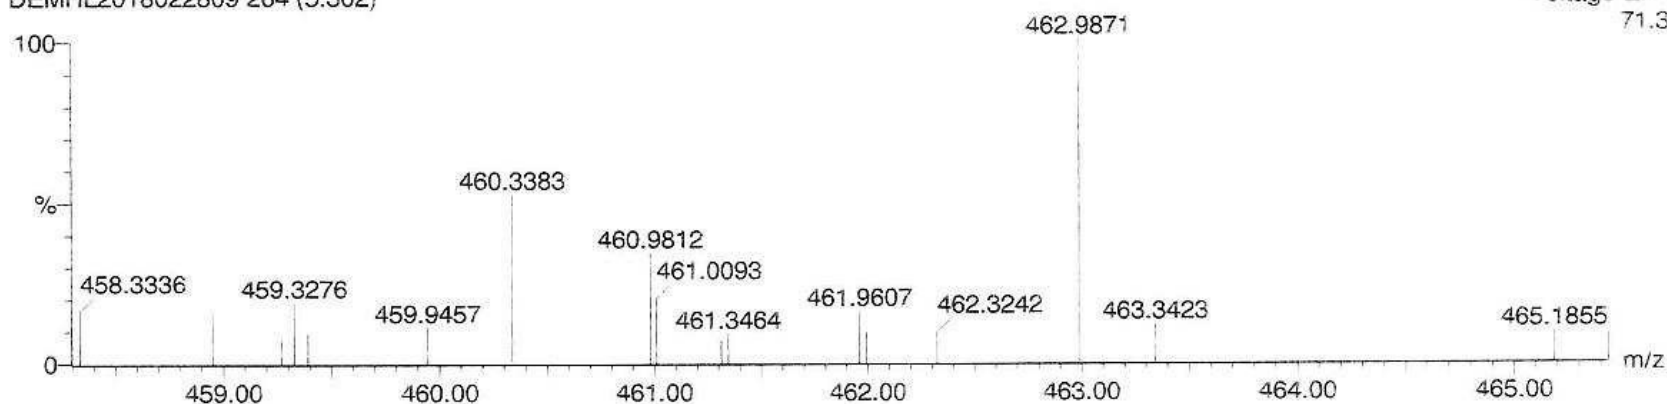

Minimum: -1.5  
Maximum: 200.0 10.0 50.0

| Mass     | Calc. Mass | mDa | PPM | DBE  | Score | Formula |     |    |    |
|----------|------------|-----|-----|------|-------|---------|-----|----|----|
| 460.3383 | 460.3373   | 1.0 | 2.2 | 6.0  | 2     | C28     | H48 | O3 | Si |
|          | 460.3341   | 4.2 | 9.1 | 11.0 | 1     | C32     | H44 | O2 |    |

Figure S35 HRMS of TBS-protected ethyl ester 11

**3(R)-HEPE (2):**

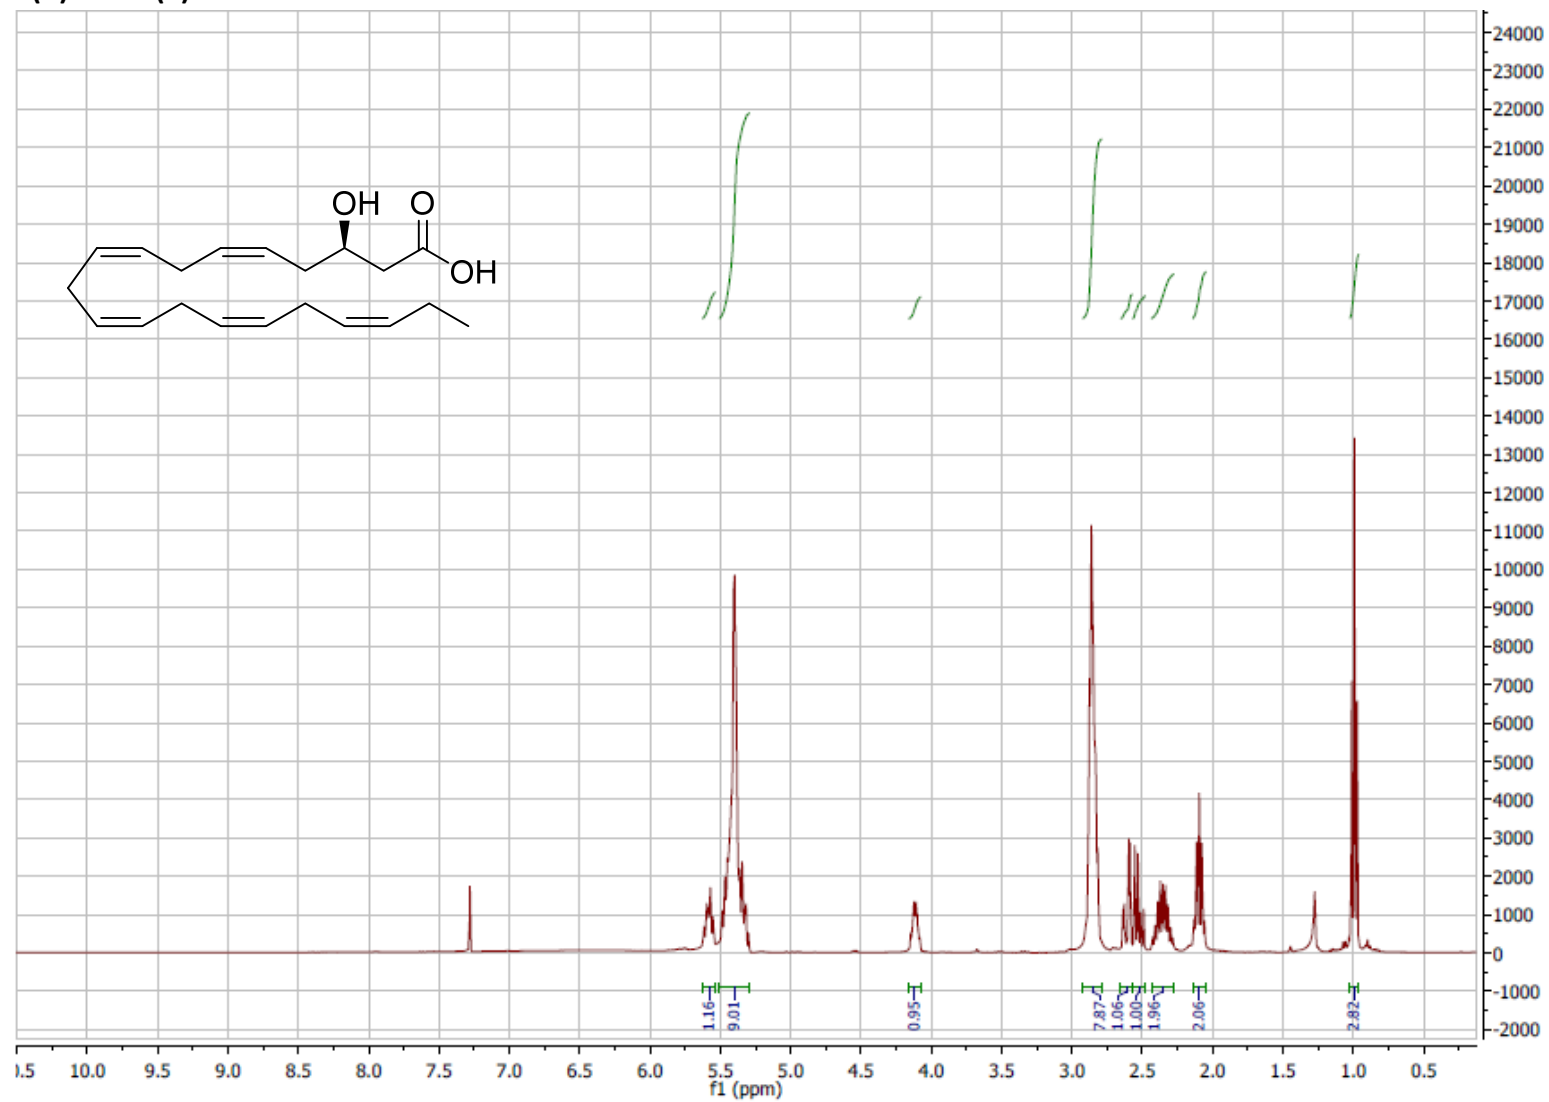

Figure S36  $^1\text{H}$  NMR spectrum of 3(R)-HEPE (2).

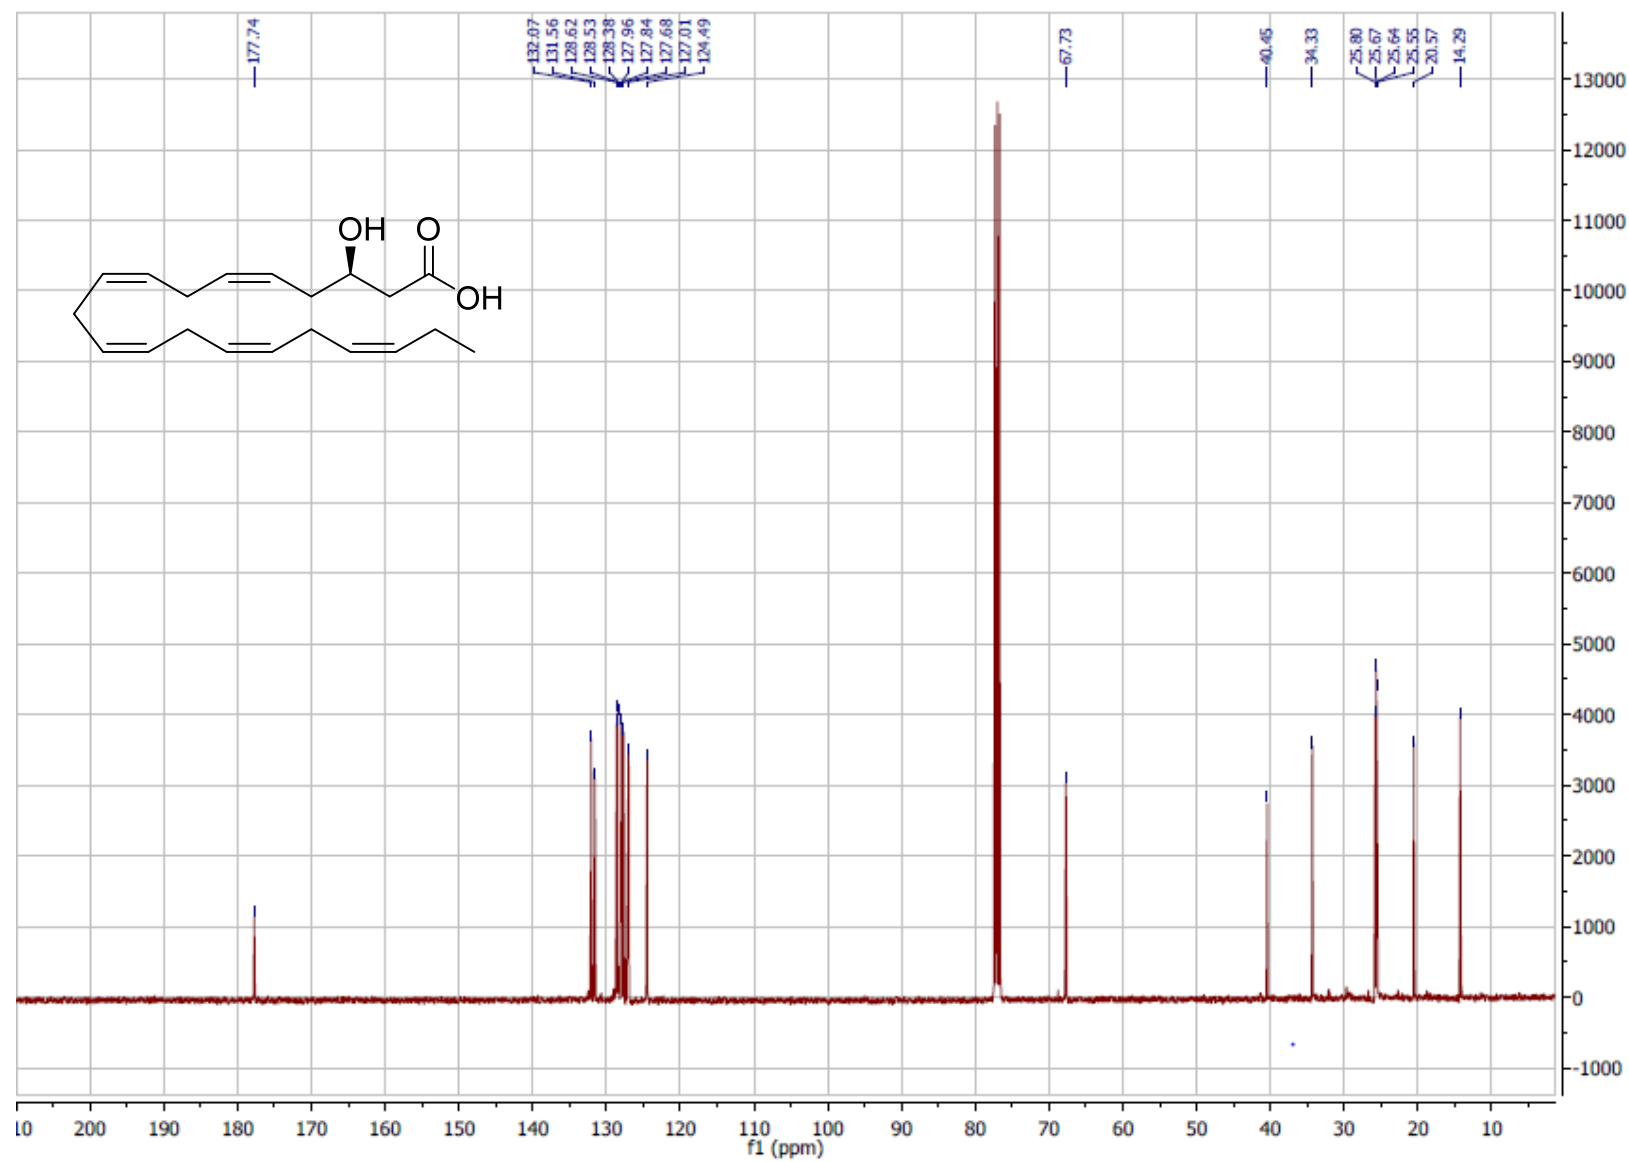

Figure S37  $^{13}\text{C}$  NMR spectrum of 3(R)-HEPE (2).

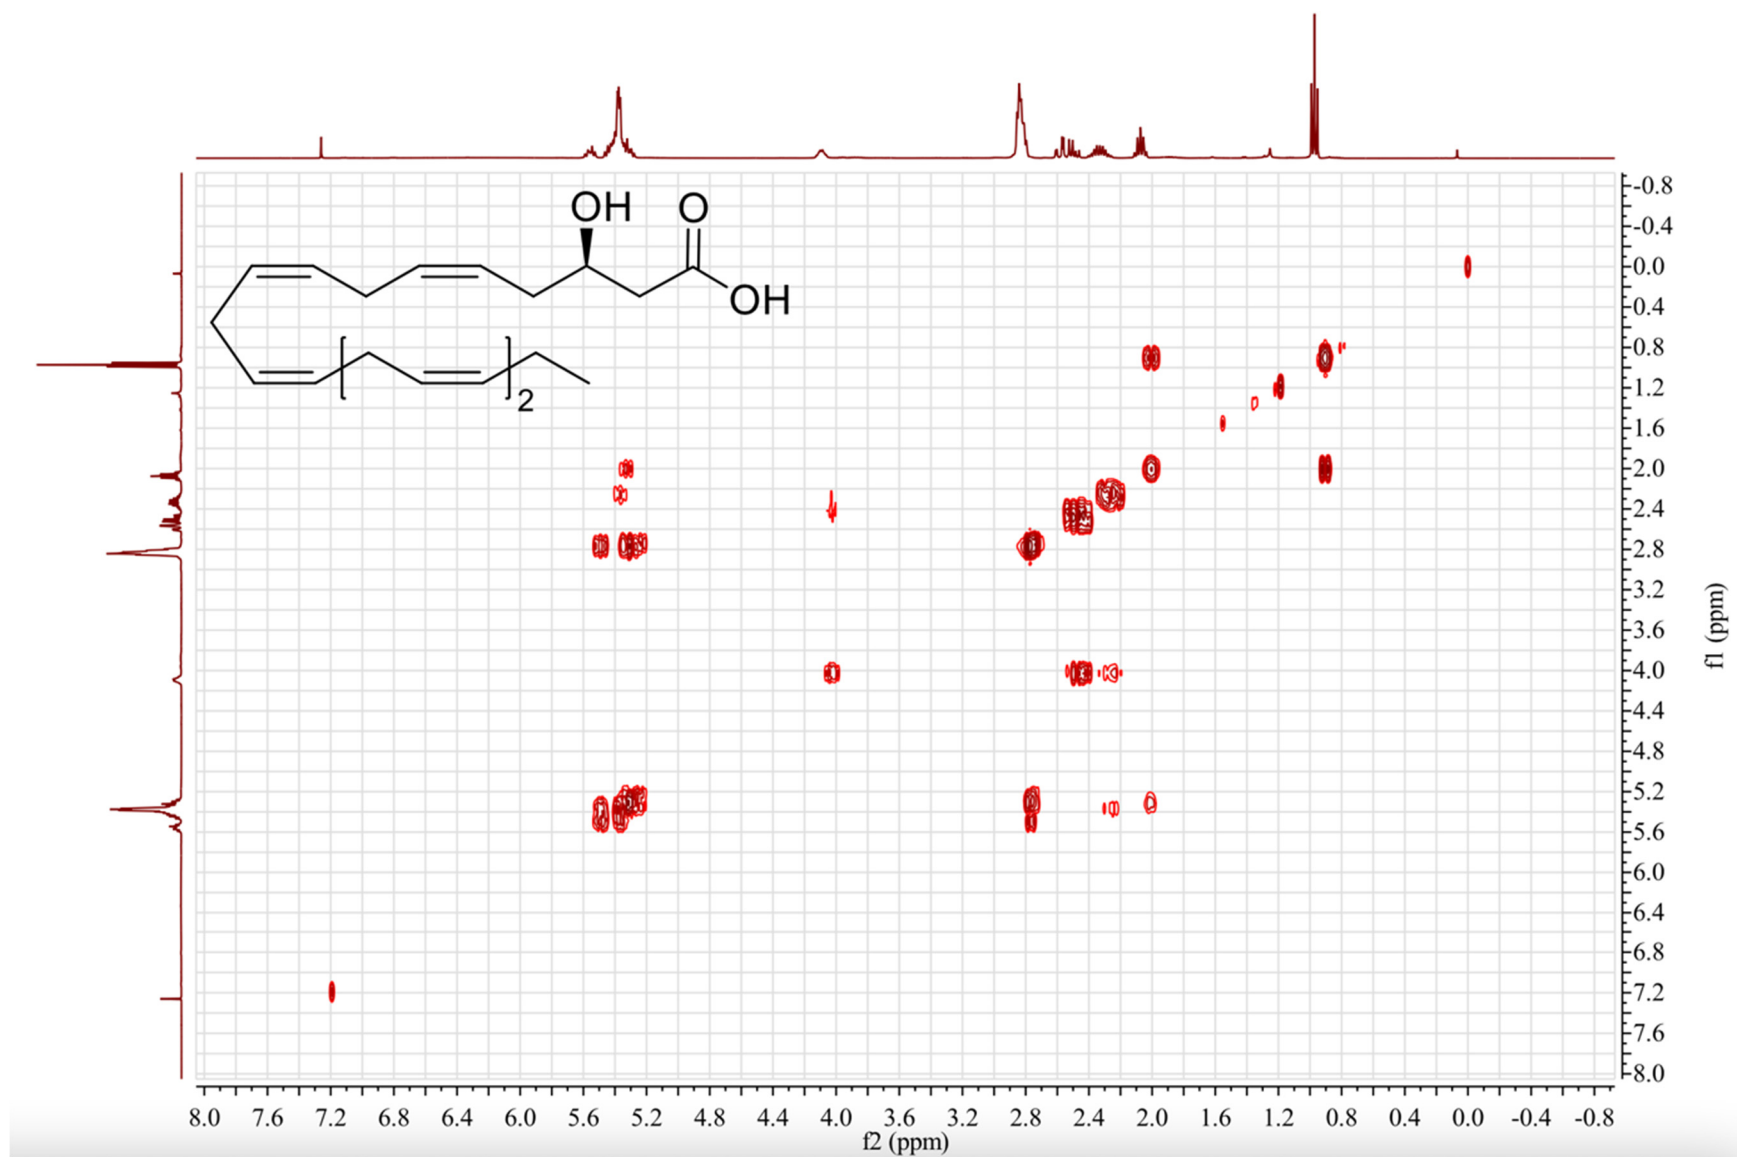

Figure S38 COSY spectrum of 3(R)-HEPE (2).

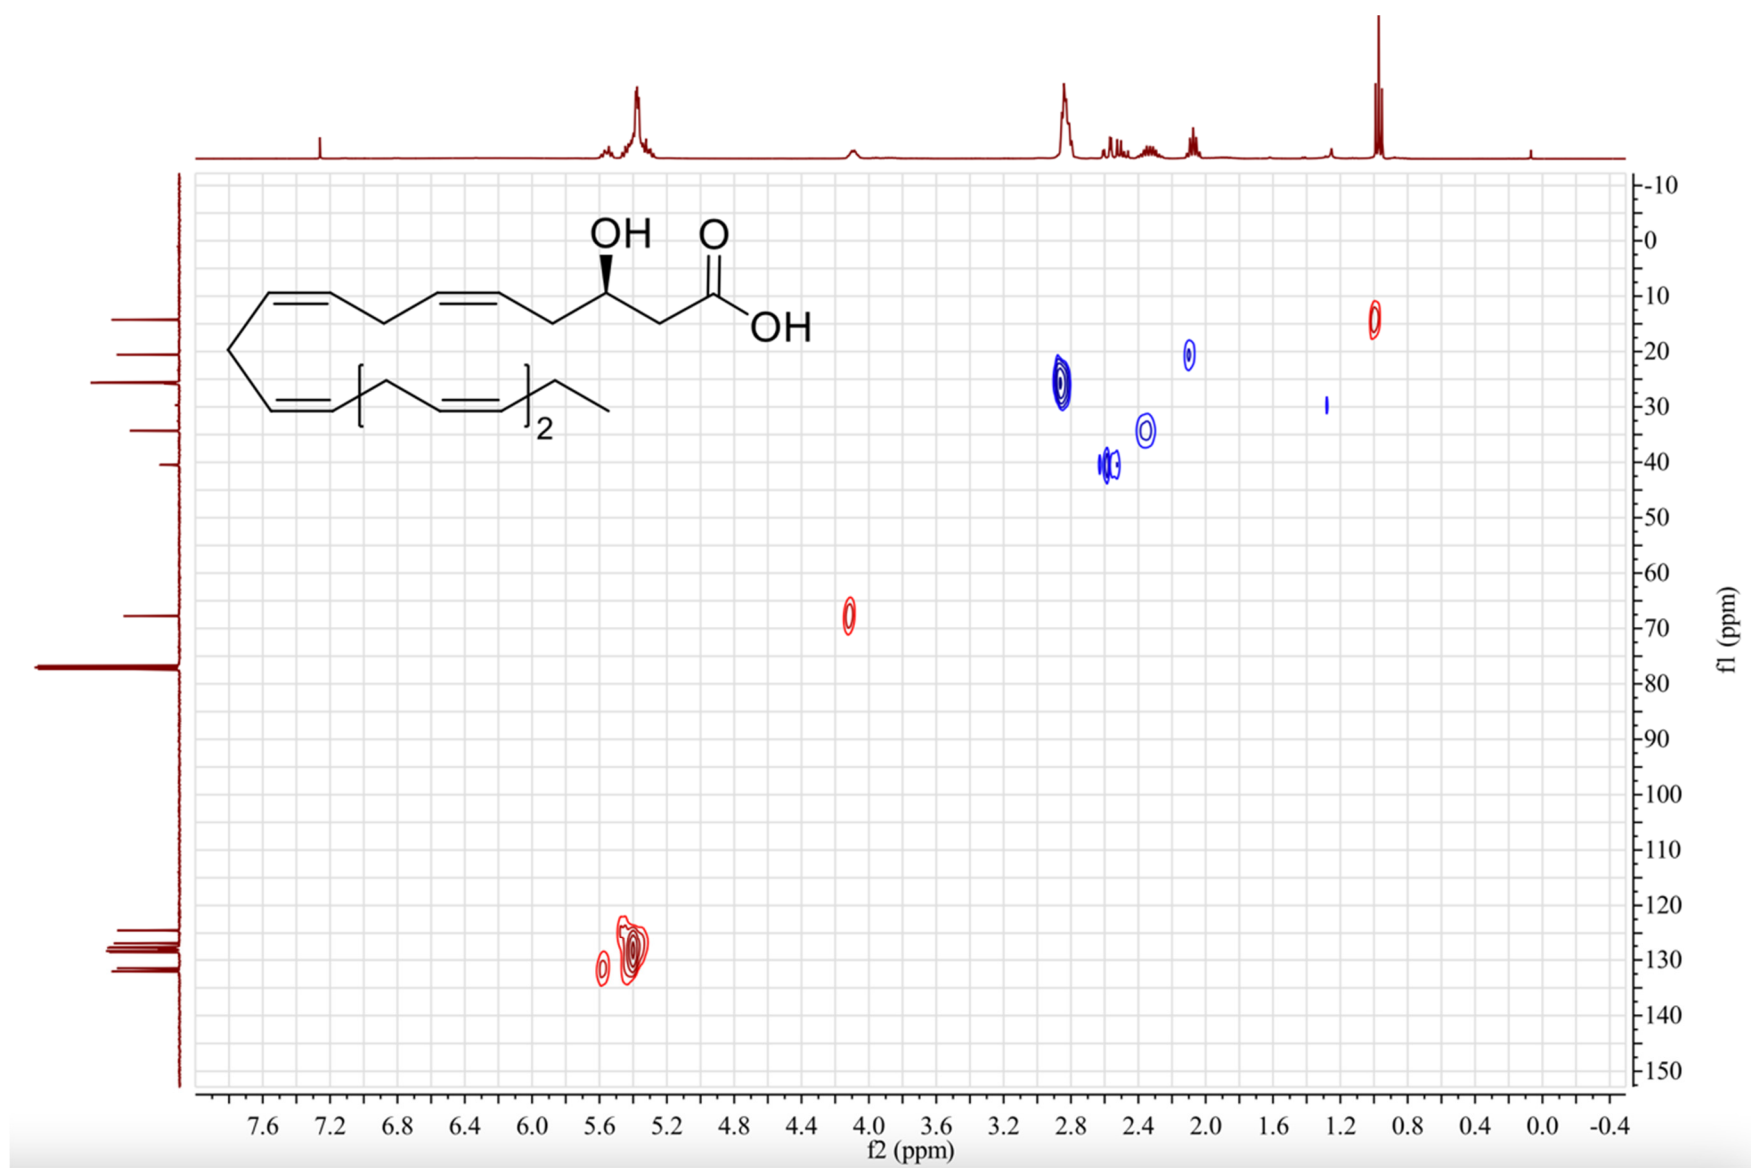

Figure S39 HMBC spectrum of 3(R)-HEPE (2).

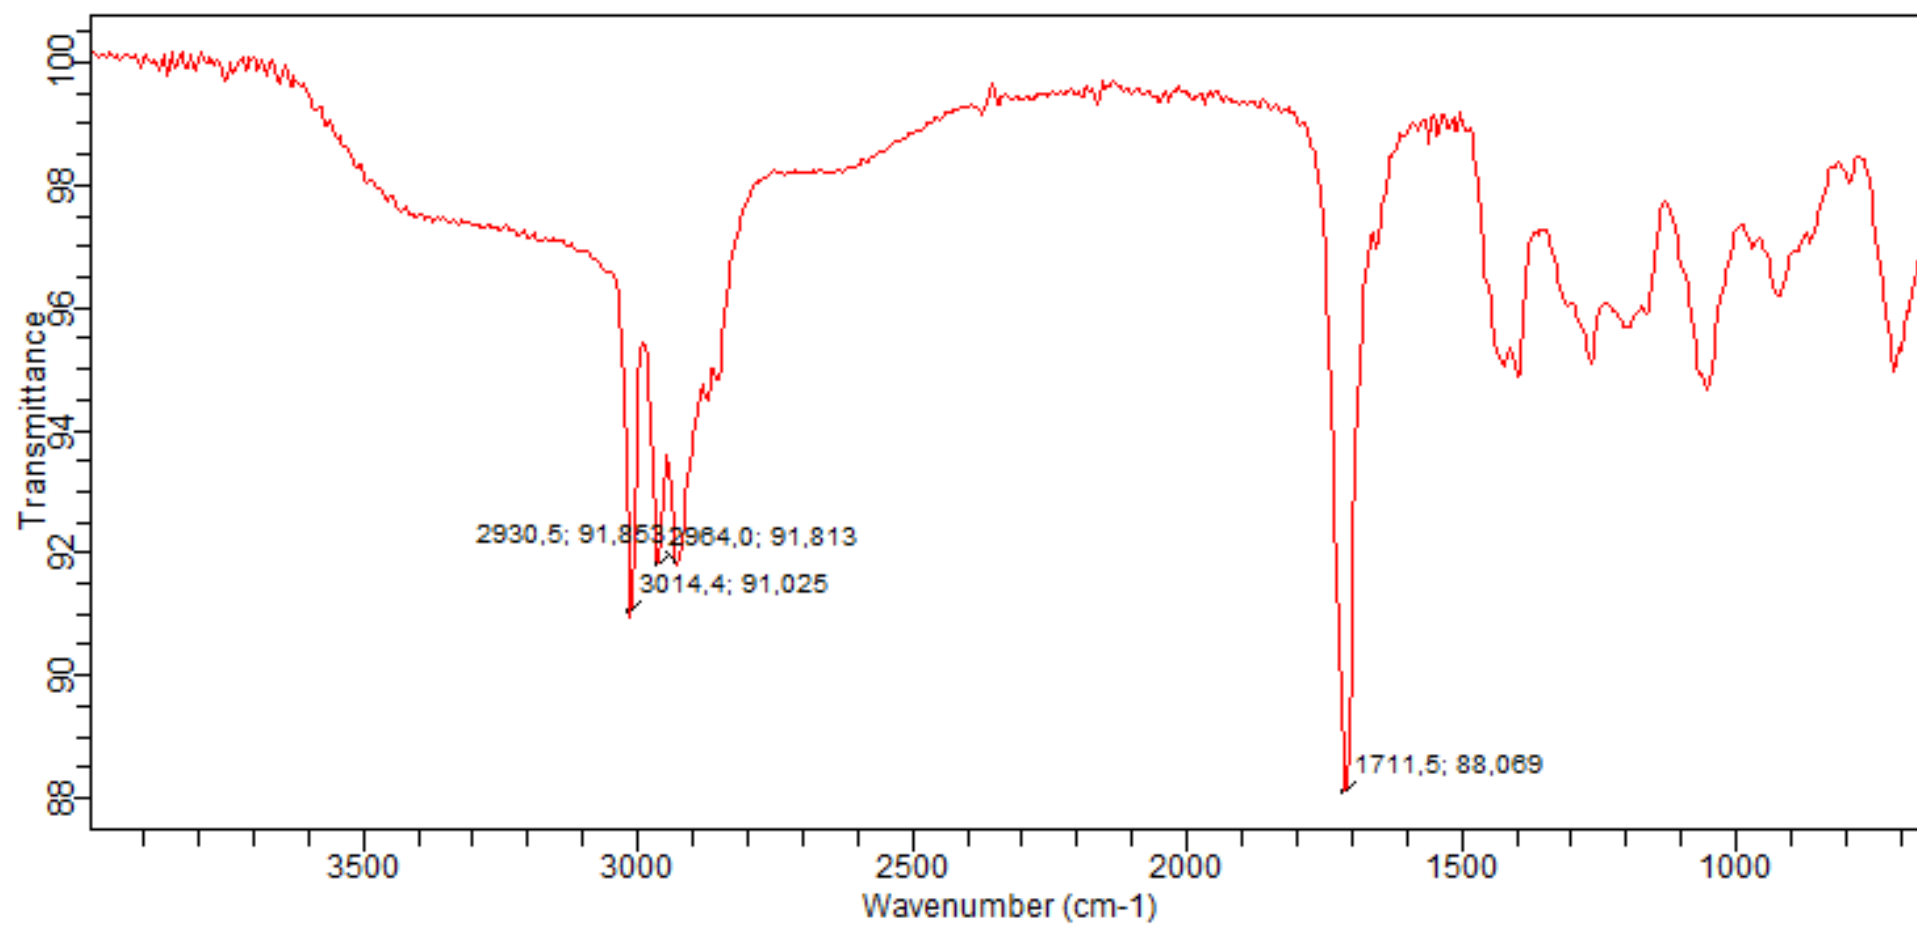

Figure S40 IR spectrum of 3(R)-HEPE (2).

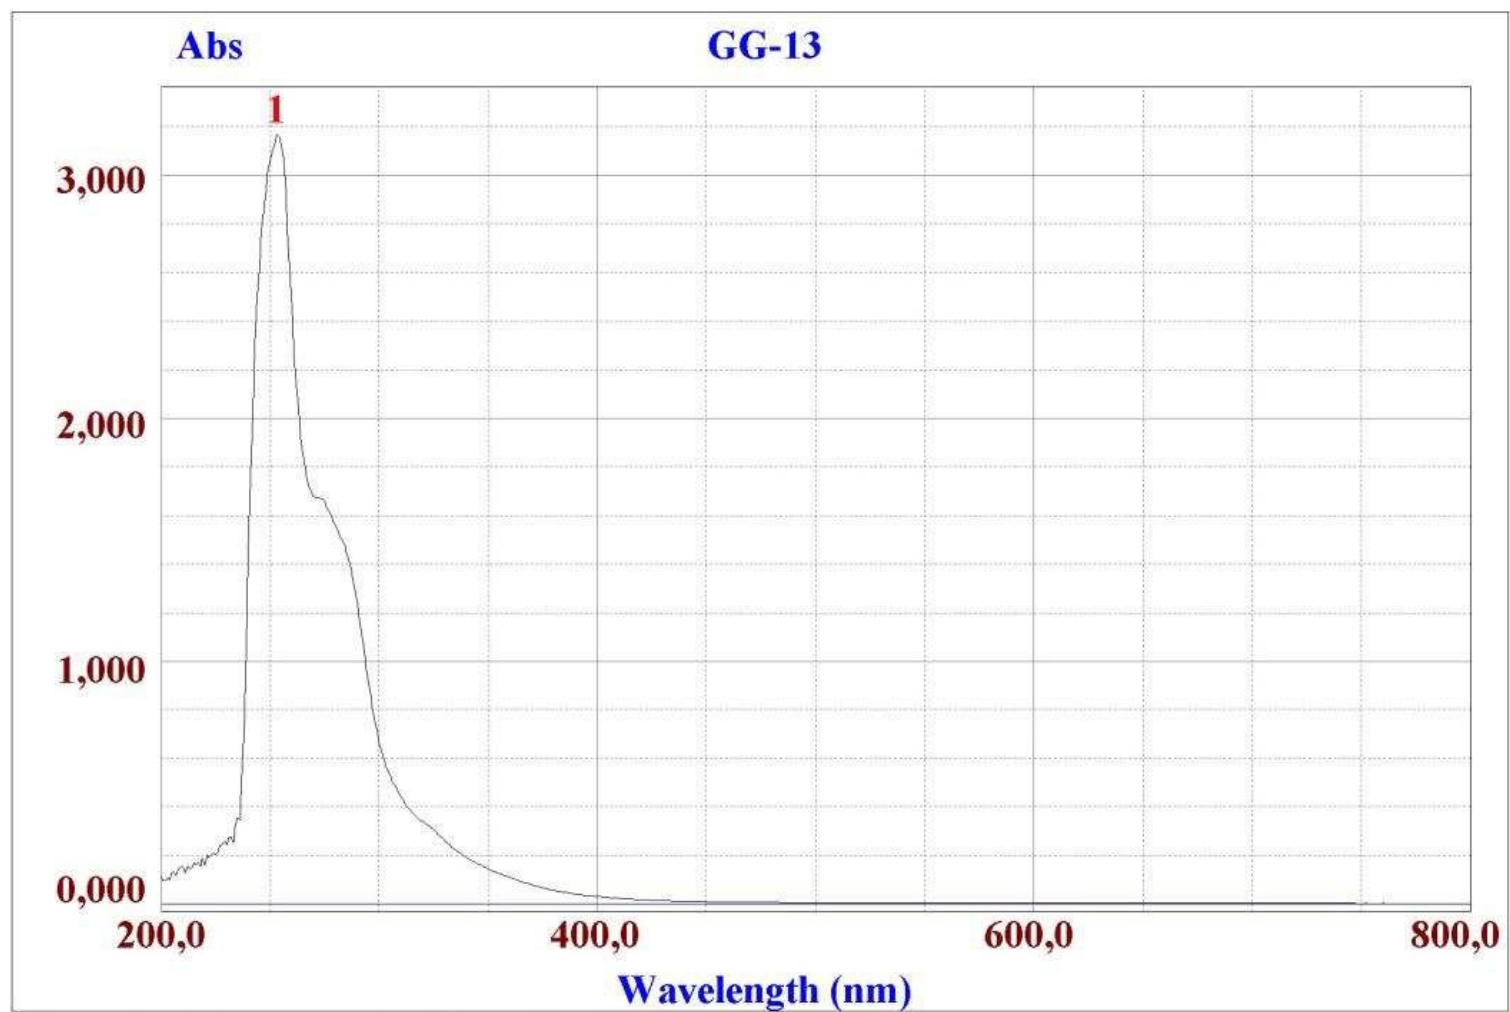

| <u>No.</u> | <u>Peak Type</u> | <u>Position</u> | <u>Height</u> |
|------------|------------------|-----------------|---------------|
| 1          | Peak             | 253,4           | 3,169         |

Figure S41 UV spectrum of 3(R)-HEPE (2).

# Acquisition Parameter

|             |            |                      |          |                  |           |
|-------------|------------|----------------------|----------|------------------|-----------|
| Source Type | ESI        | Ion Polarity         | Positive | Set Nebulizer    | 0.4 Bar   |
| Focus       | Not active | Set Capillary        | 3500 V   | Set Dry Heater   | 200 °C    |
| Scan Begin  | 50 m/z     | Set End Plate Offset | -500 V   | Set Dry Gas      | 4.0 l/min |
| Scan End    | 1500 m/z   | Set Charging Voltage | 2000 V   | Set Divert Valve | Waste     |
|             |            | Set Corona           | 0 nA     | Set APCI Heater  | 0 °C      |

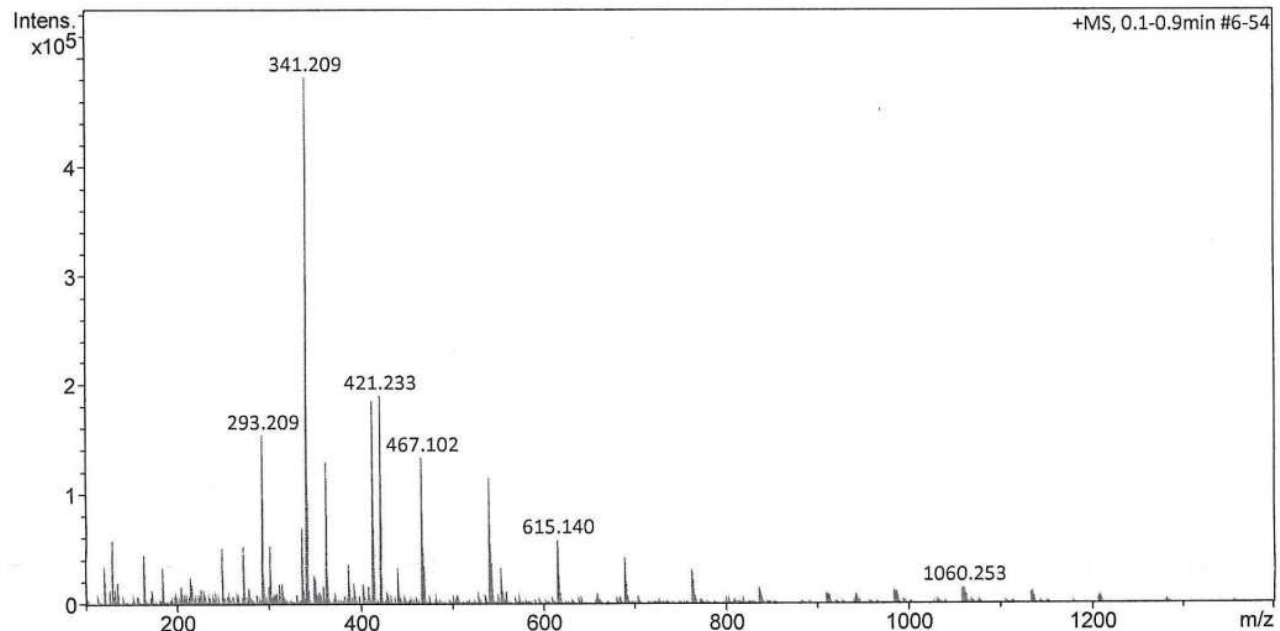

| #  | m/z     | I %   |    |         |      |
|----|---------|-------|----|---------|------|
| 1  | 129.052 | 12.0  | 11 | 413.266 | 38.5 |
| 2  | 164.920 | 9.4   | 12 | 414.270 | 10.6 |
| 3  | 249.182 | 10.5  | 13 | 421.233 | 39.3 |
| 4  | 273.167 | 11.1  | 14 | 422.236 | 8.2  |
| 5  | 293.209 | 31.9  | 15 | 467.102 | 27.6 |
| 6  | 301.141 | 11.0  | 16 | 468.103 | 11.1 |
| 7  | 337.235 | 14.5  | 17 | 541.121 | 24.0 |
| 8  | 341.209 | 100.0 | 18 | 542.121 | 11.6 |
| 9  | 342.212 | 22.2  | 19 | 615.140 | 12.2 |
| 10 | 363.191 | 27.0  | 20 | 689.158 | 8.8  |

Figure S42 MS of 3(R)-HEPE (2)

# Acquisition Parameter

|             |            |                      |          |                  |           |
|-------------|------------|----------------------|----------|------------------|-----------|
| Source Type | ESI        | Ion Polarity         | Positive | Set Nebulizer    | 0.4 Bar   |
| Focus       | Not active | Set Capillary        | 3500 V   | Set Dry Heater   | 200 °C    |
| Scan Begin  | 50 m/z     | Set End Plate Offset | -500 V   | Set Dry Gas      | 4.0 l/min |
| Scan End    | 1500 m/z   | Set Charging Voltage | 2000 V   | Set Divert Valve | Waste     |
|             |            | Set Corona           | 0 nA     | Set APCI Heater  | 0 °C      |

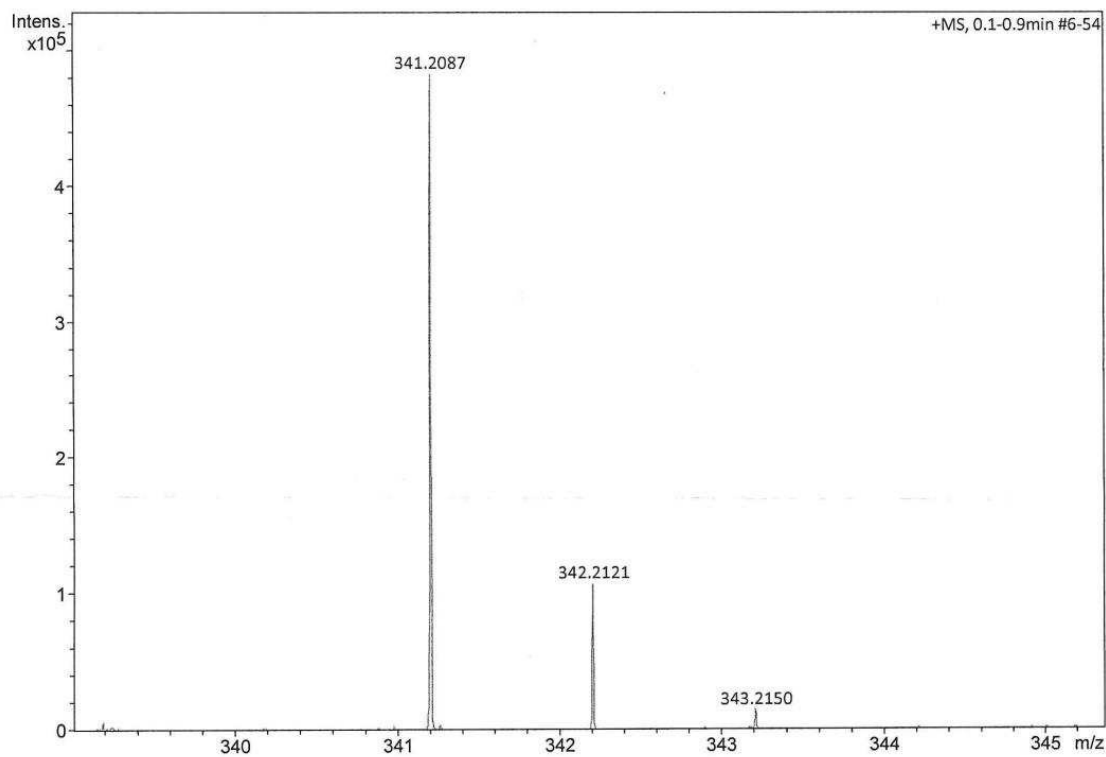

| Meas. m/z | Ion Formula                                                   | m/z      | err [ppm] |
|-----------|---------------------------------------------------------------|----------|-----------|
| 341.2087  | C <sub>20</sub> H <sub>30</sub> NaO <sub>3</sub>              | 341.2087 | 0.1       |
|           | C <sub>18</sub> H <sub>25</sub> N <sub>6</sub> O              | 341.2084 | -0.7      |
|           | C <sub>22</sub> H <sub>29</sub> O <sub>3</sub>                | 341.2111 | 7.1       |
|           | C <sub>16</sub> H <sub>26</sub> N <sub>6</sub> NaO            | 341.2060 | -7.8      |
|           | C <sub>17</sub> H <sub>29</sub> N <sub>2</sub> O <sub>5</sub> | 341.2071 | -4.7      |

Figure S43 HRMS of 3(R)-HEPE (**2**) (C<sub>20</sub>H<sub>30</sub>O<sub>3</sub>)

**Aldol product 13:**

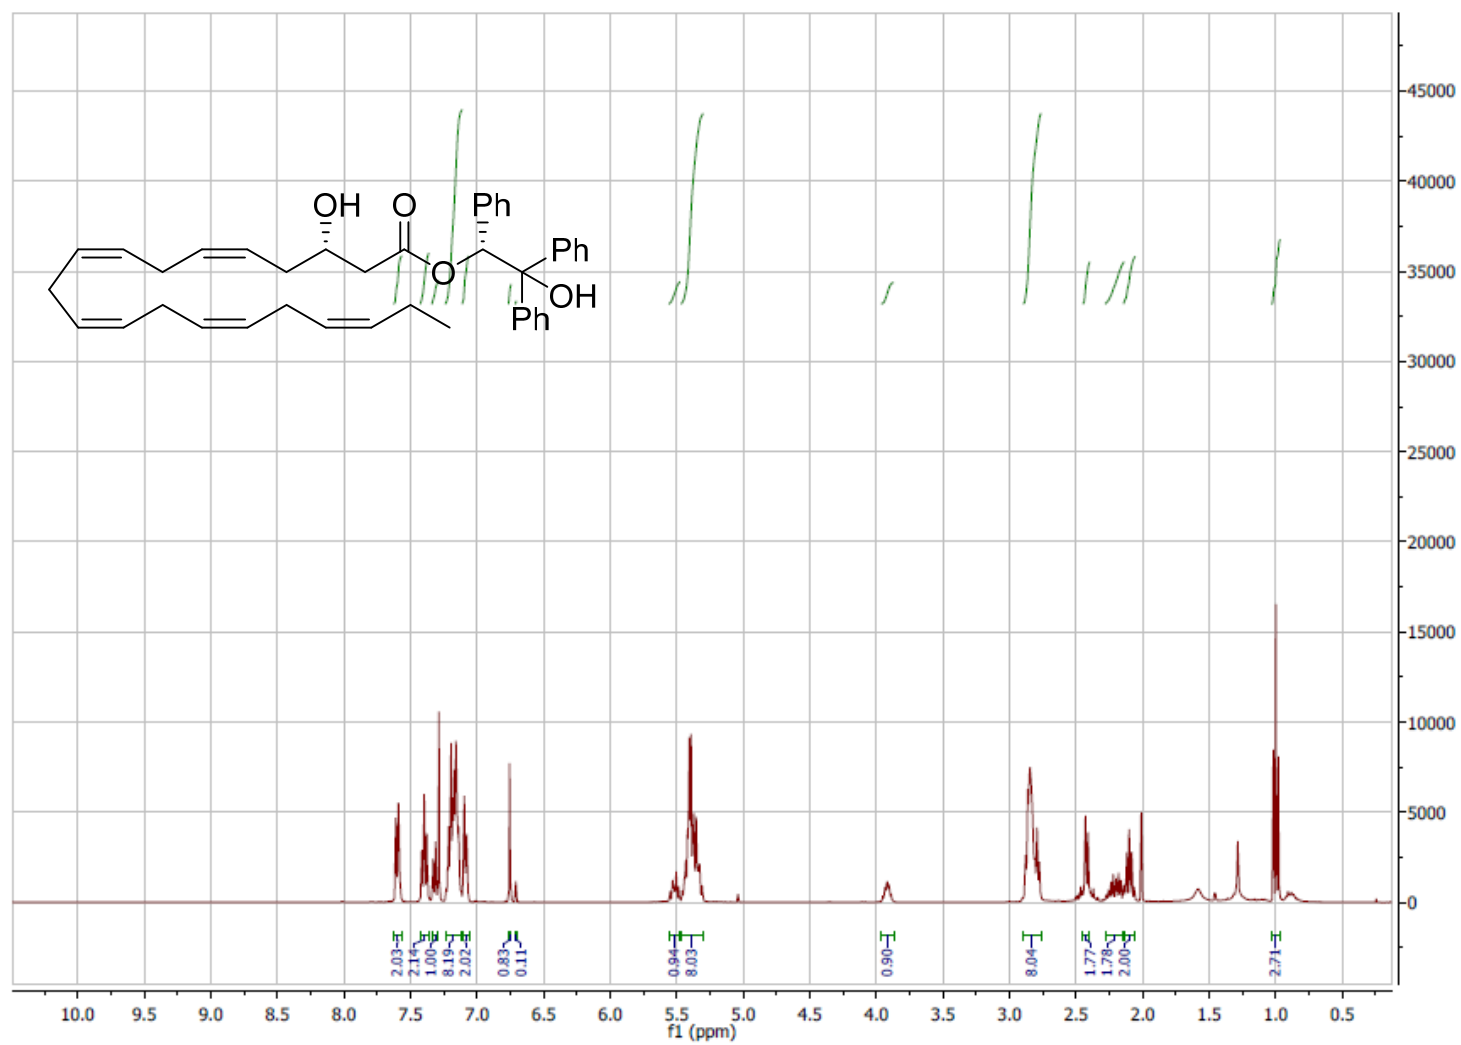

**Figure S44.** <sup>1</sup>H NMR spectrum of **14**.

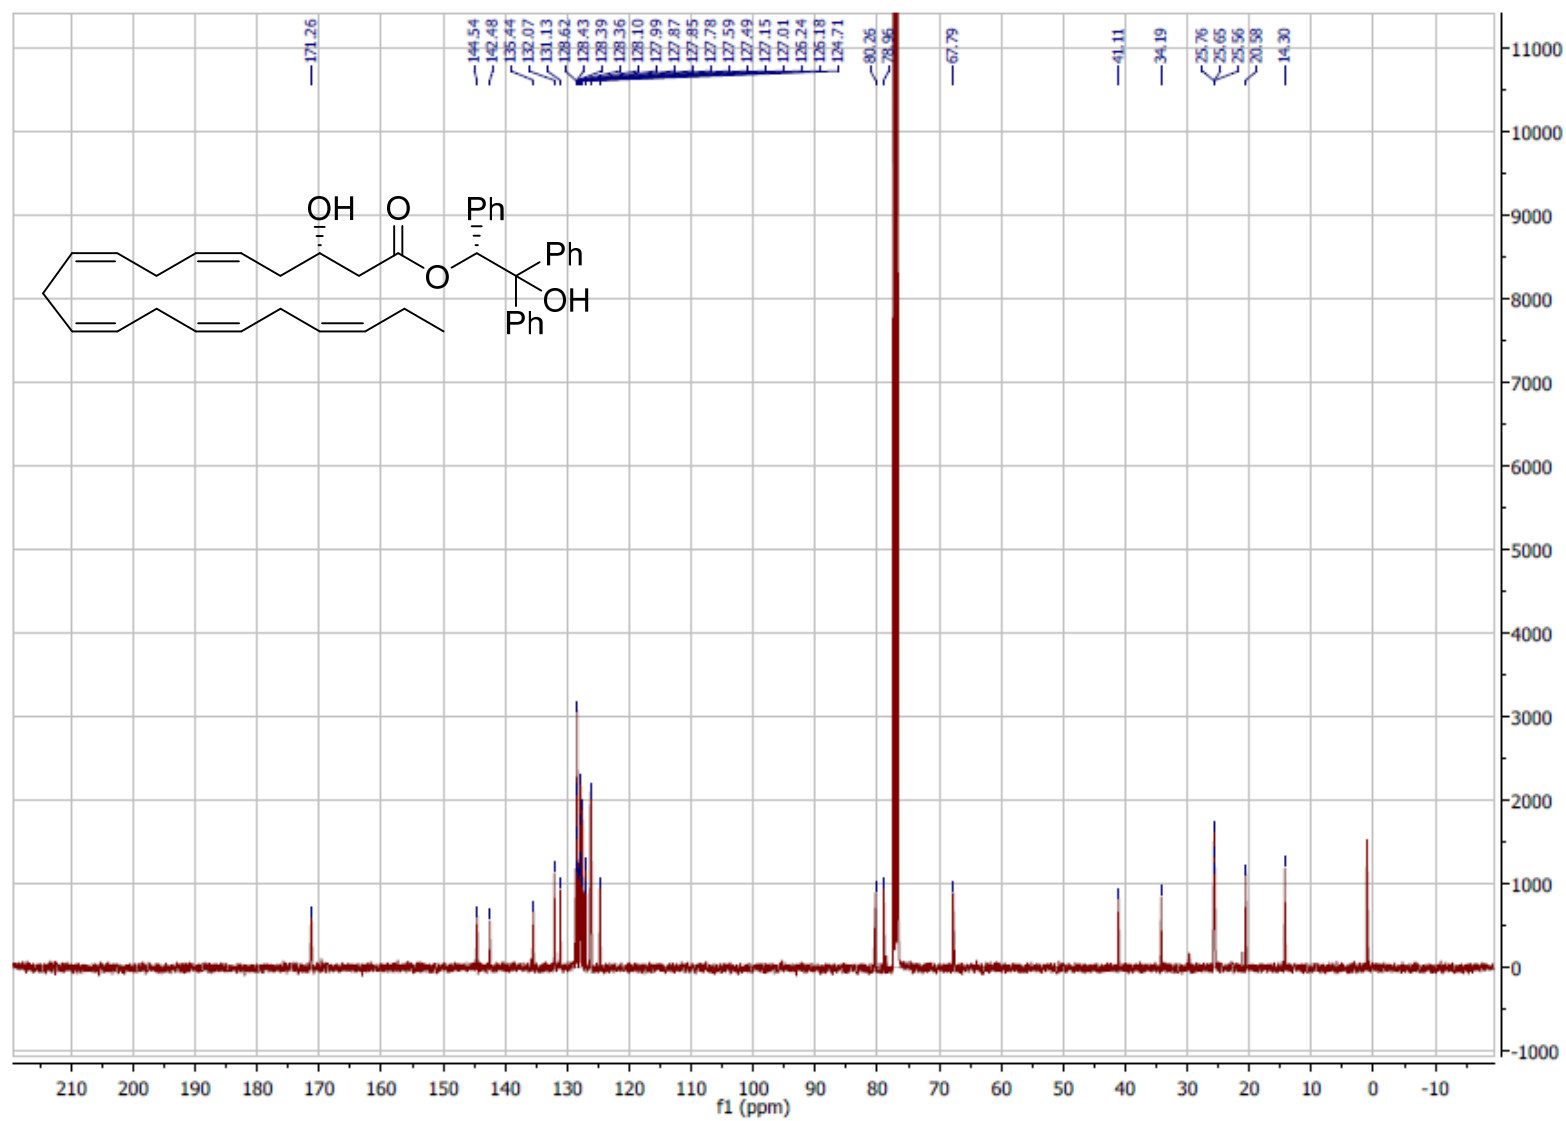

**Figure S45.**  $^{13}\text{C}$  NMR spectrum of **14**.

(R)-4-isopropylthiazolidinone-2-thione **15**:

GG-01.50.fid

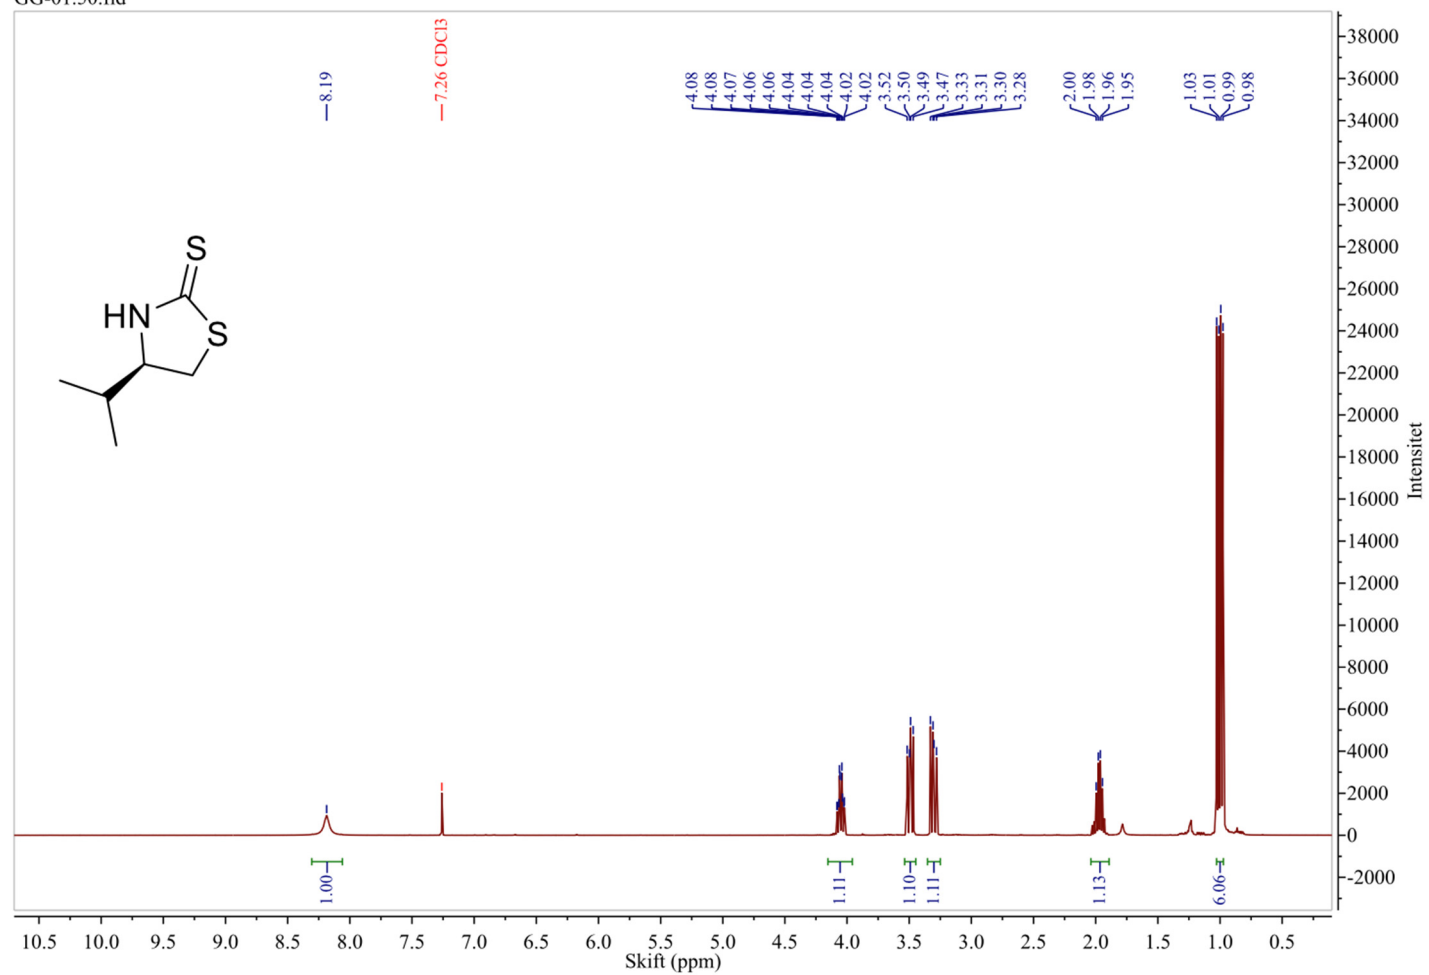

Figure S46 <sup>1</sup>H NMR spectrum of (R)-4-isopropylthiazolidinone-2-thione (**15**)

GG-01.51.fid

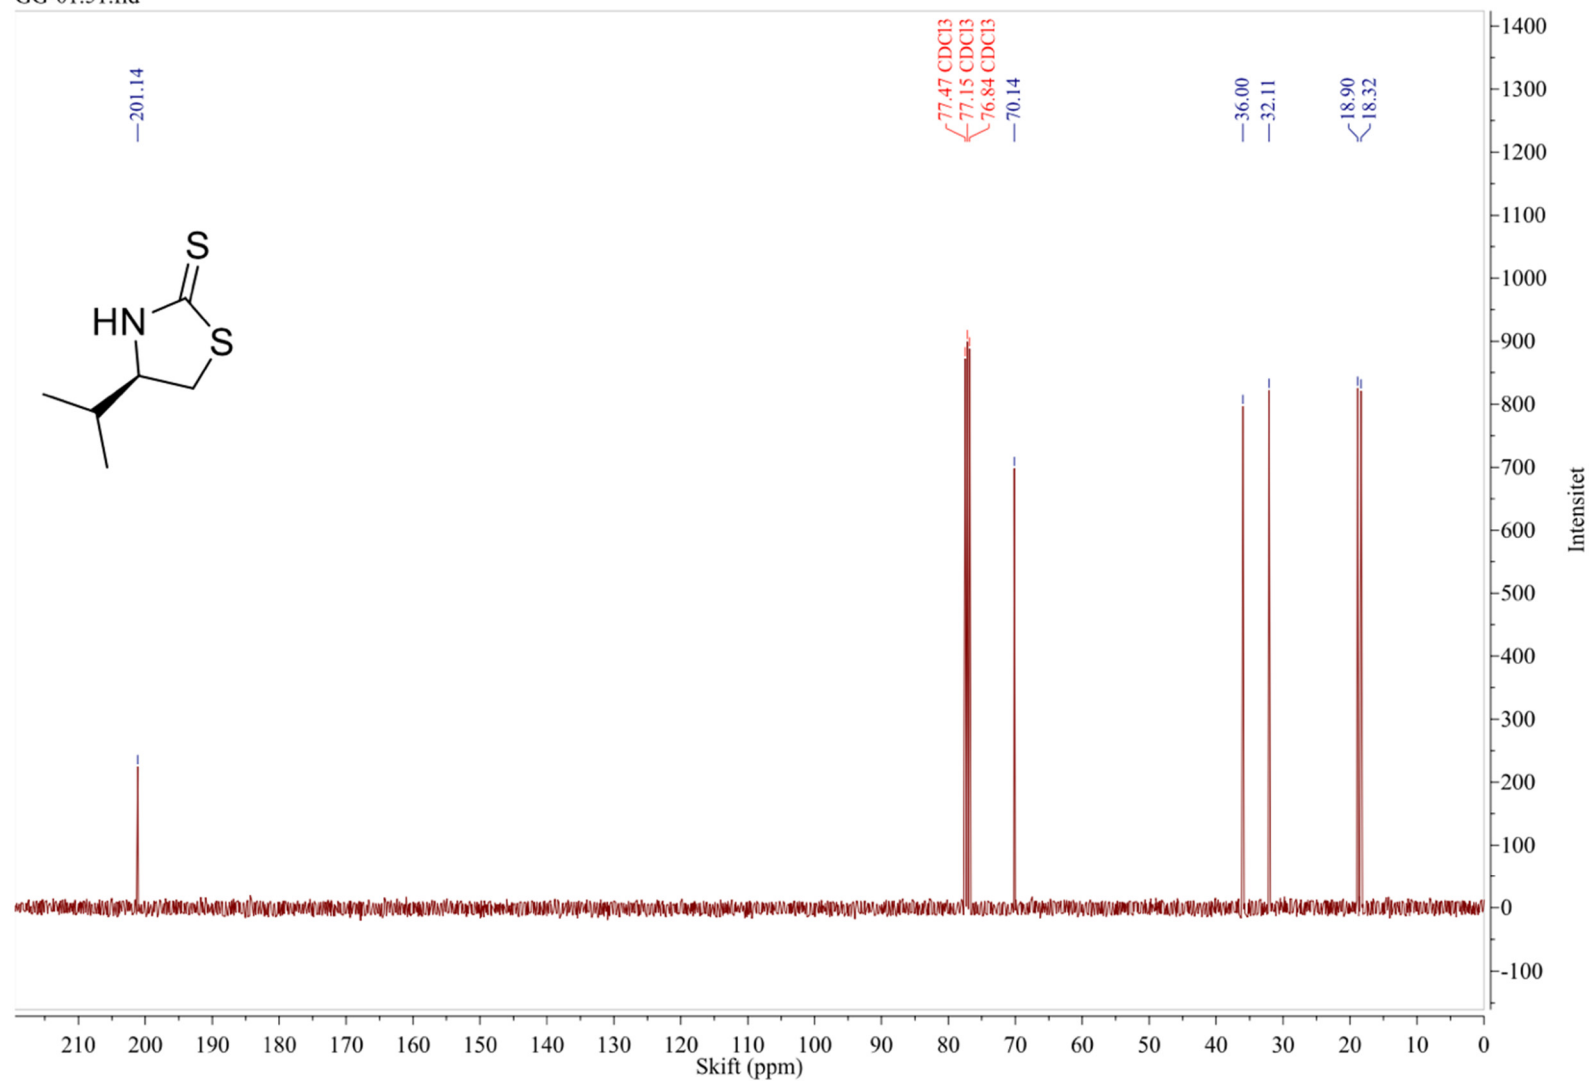

Figure S47 <sup>13</sup>C NMR spectrum of (R)-4-isopropylthiazolidinone-2-thione (15)

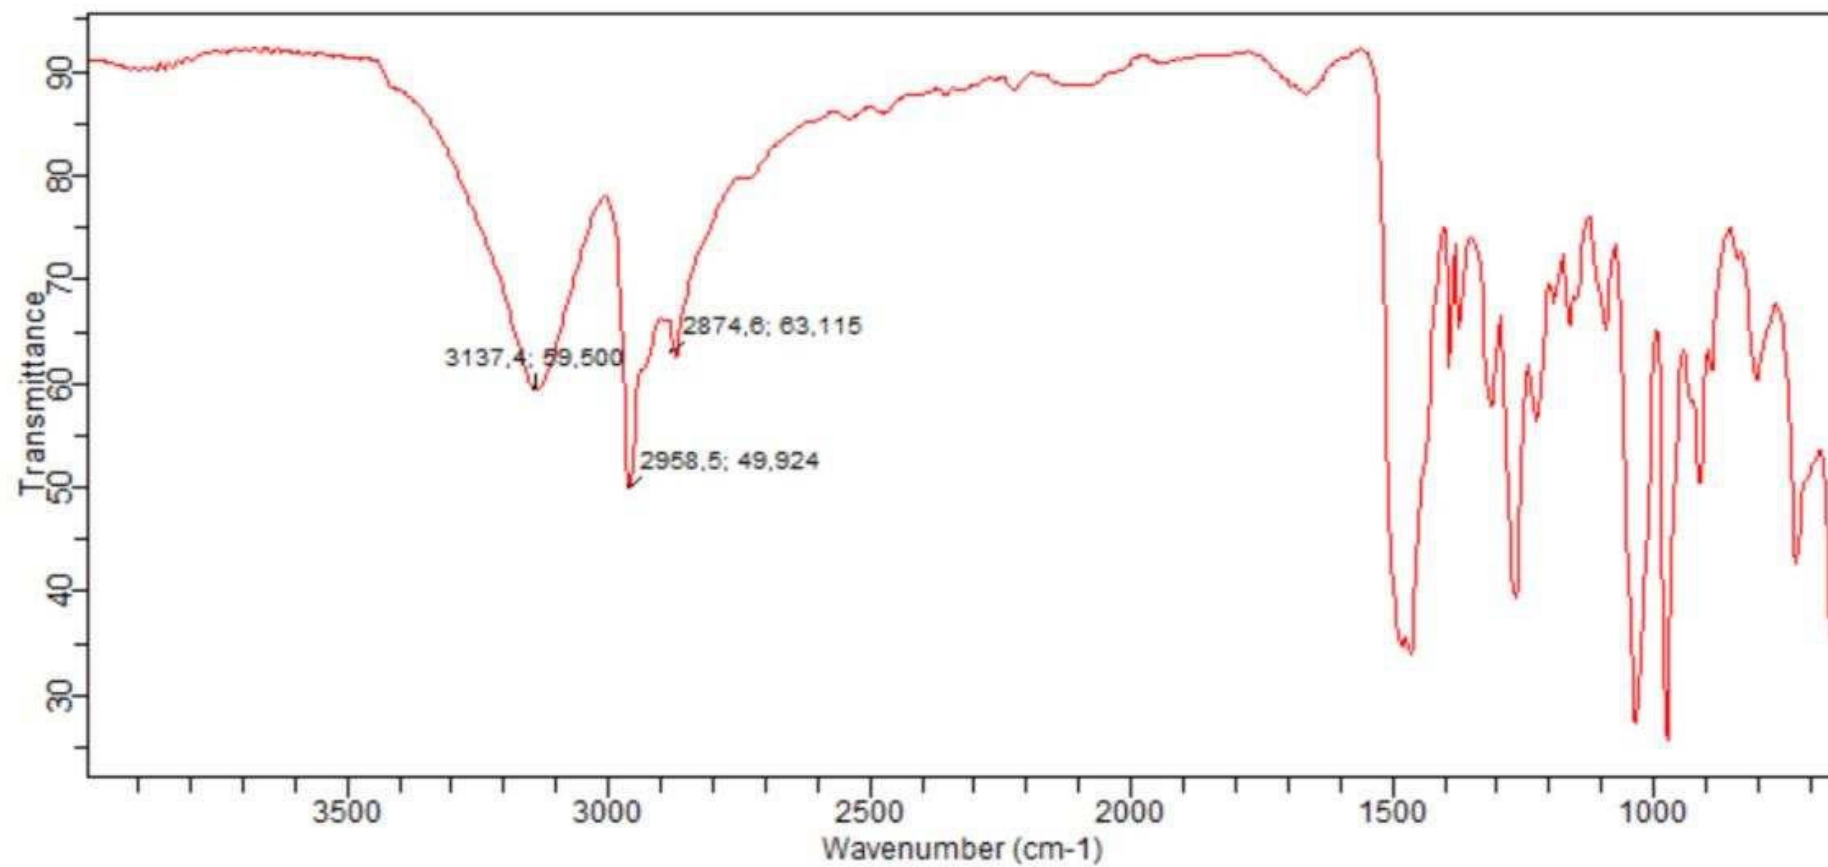

Figure S48 IR spectrum of (R)-4-isopropylthiazolidine-2-thione (15)

# Ethyl ester 16:

GG-12.30.fid

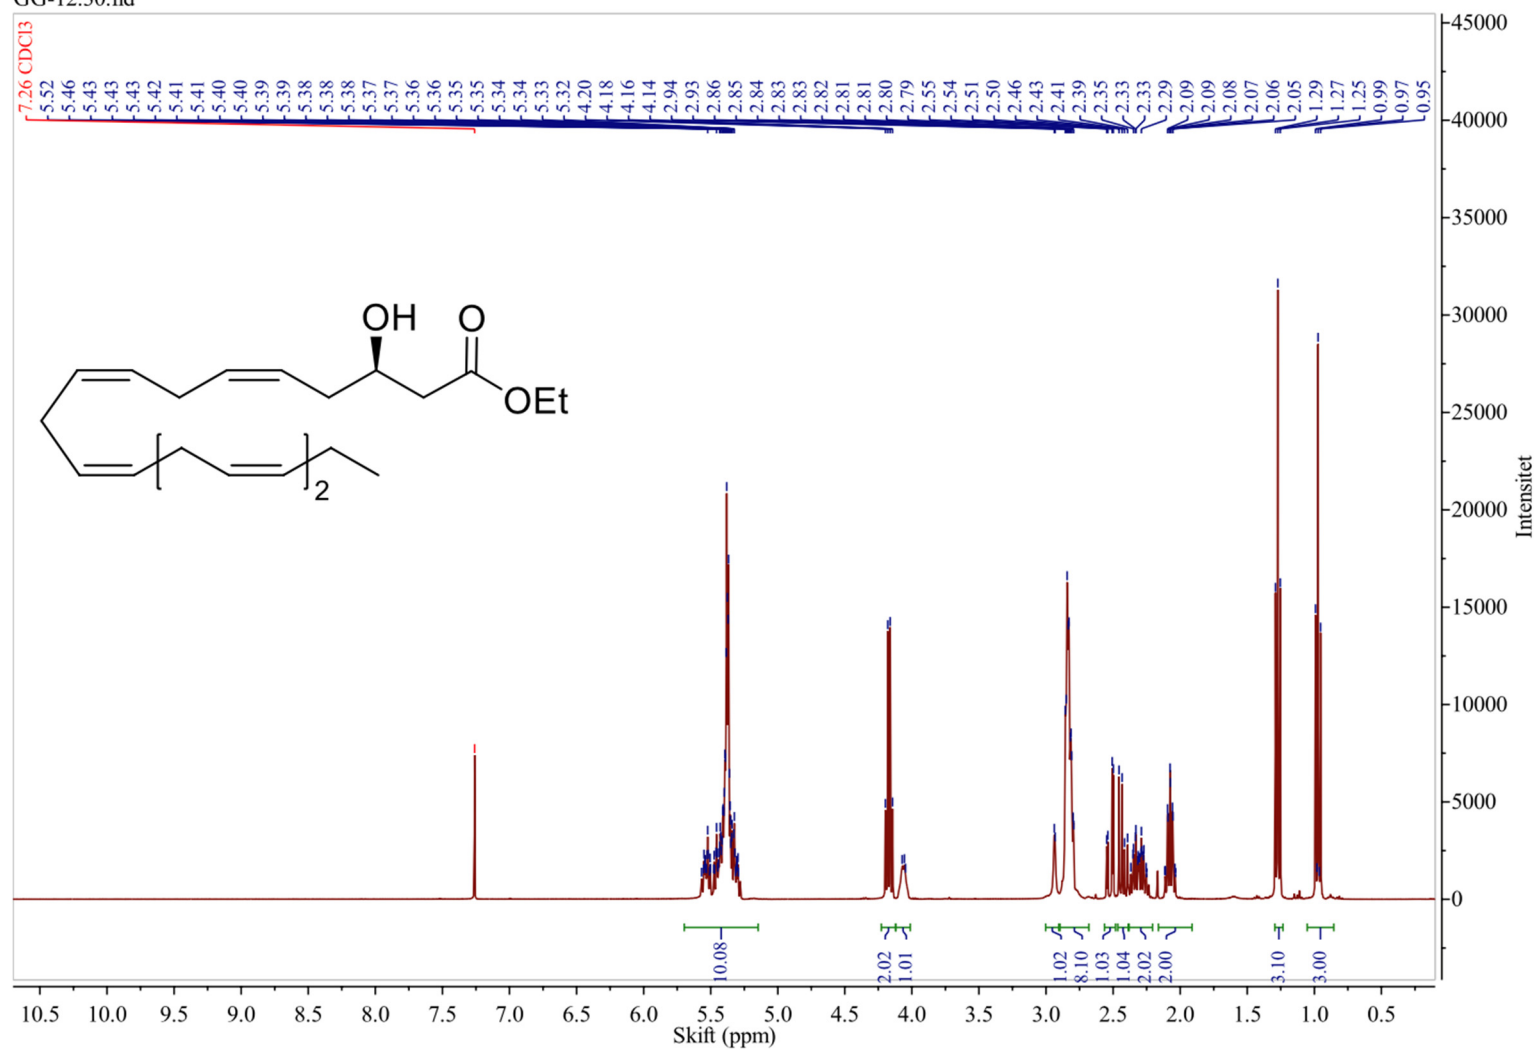

Figure S49 <sup>1</sup>H NMR spectrum of ethyl ester 16

GG-12.31.fid

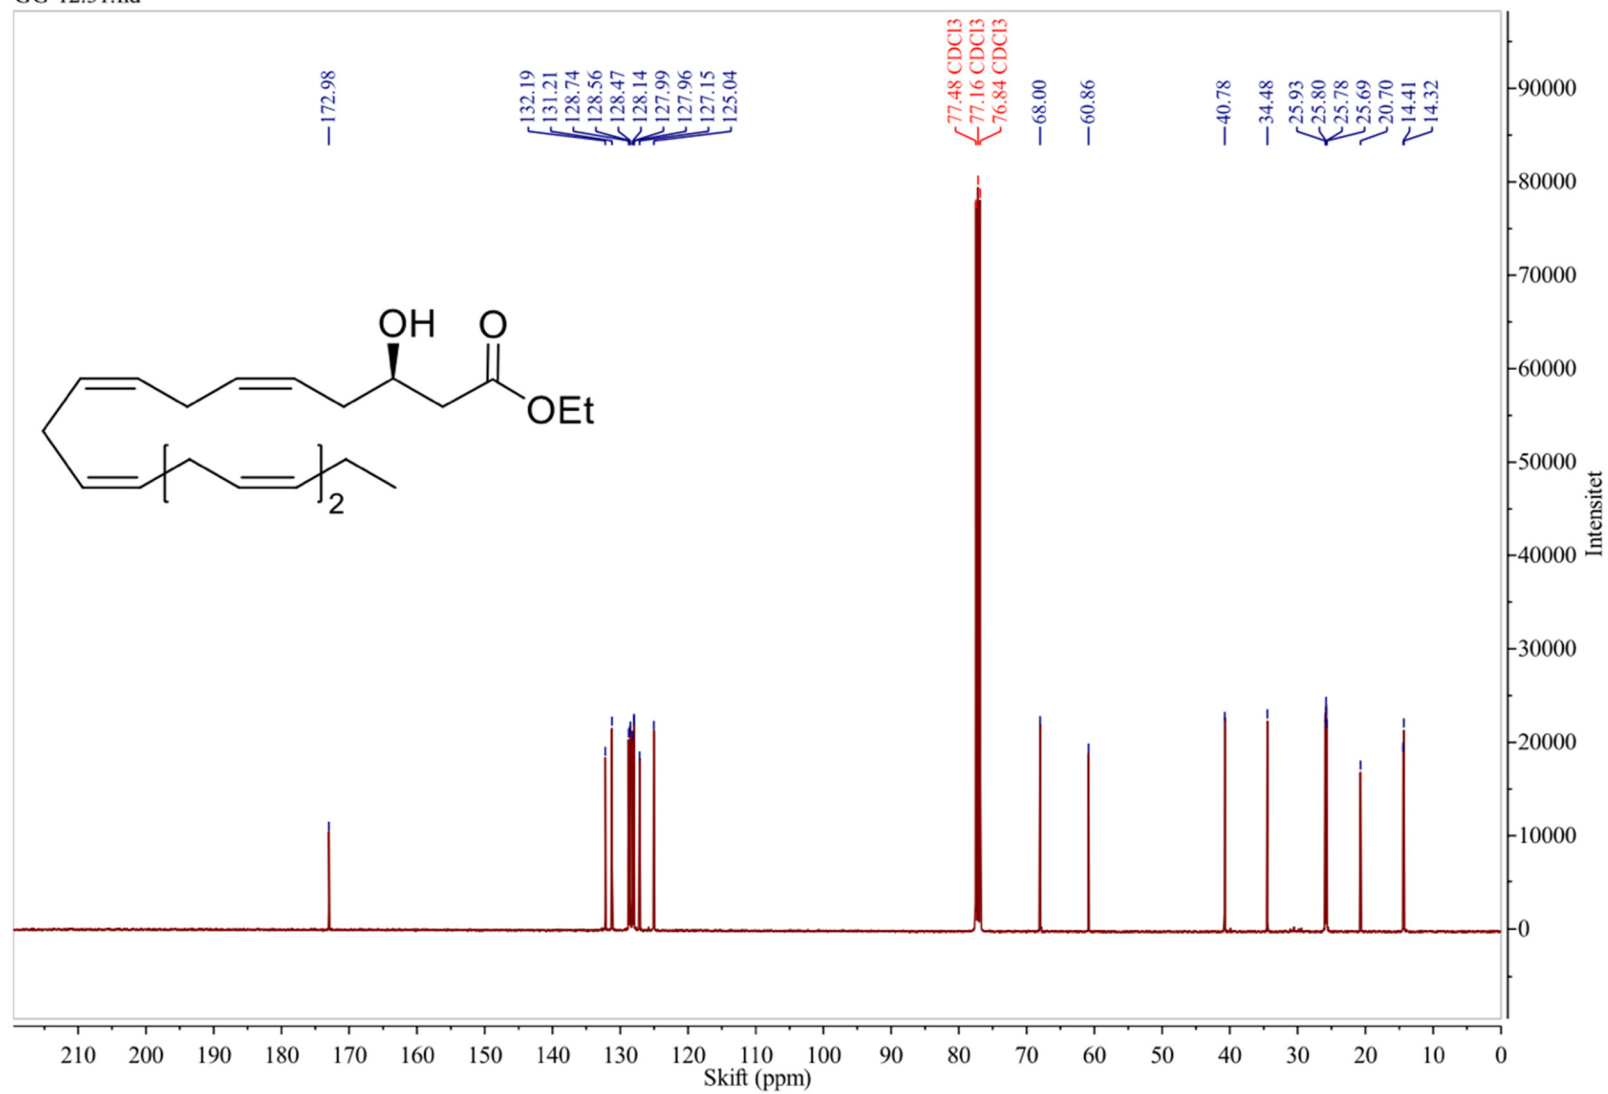

Figure S50 <sup>13</sup>C NMR spectrum of ethyl ester 16

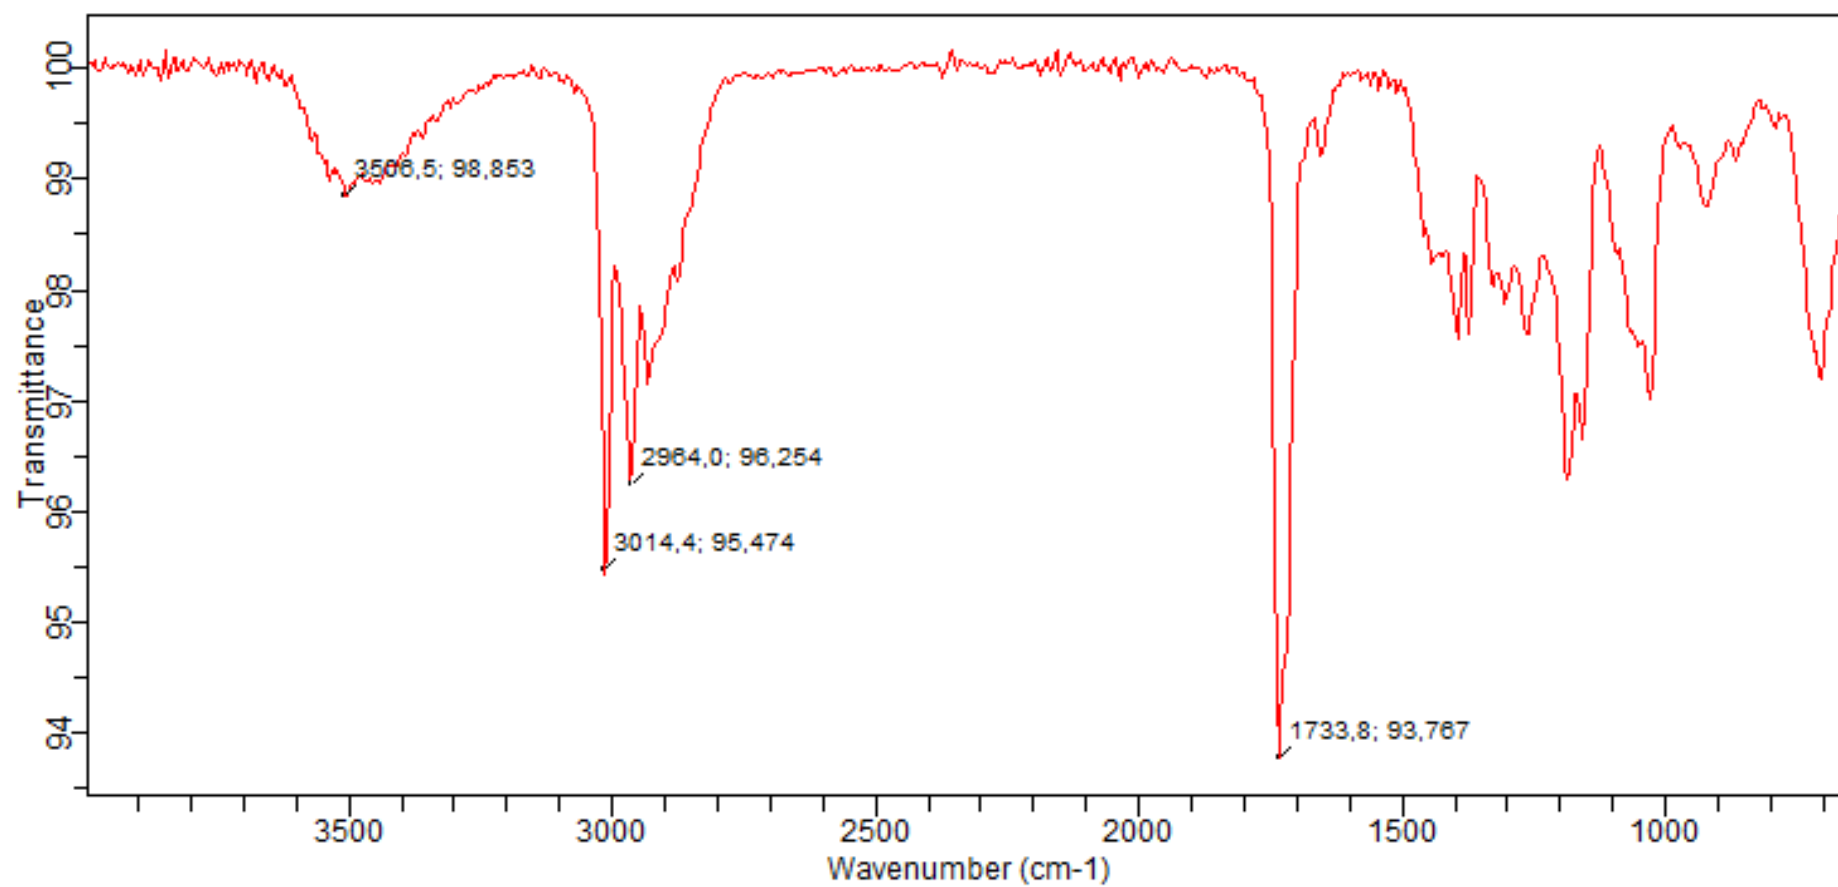

Figure S51 IR spectrum of ethyl ester 16.

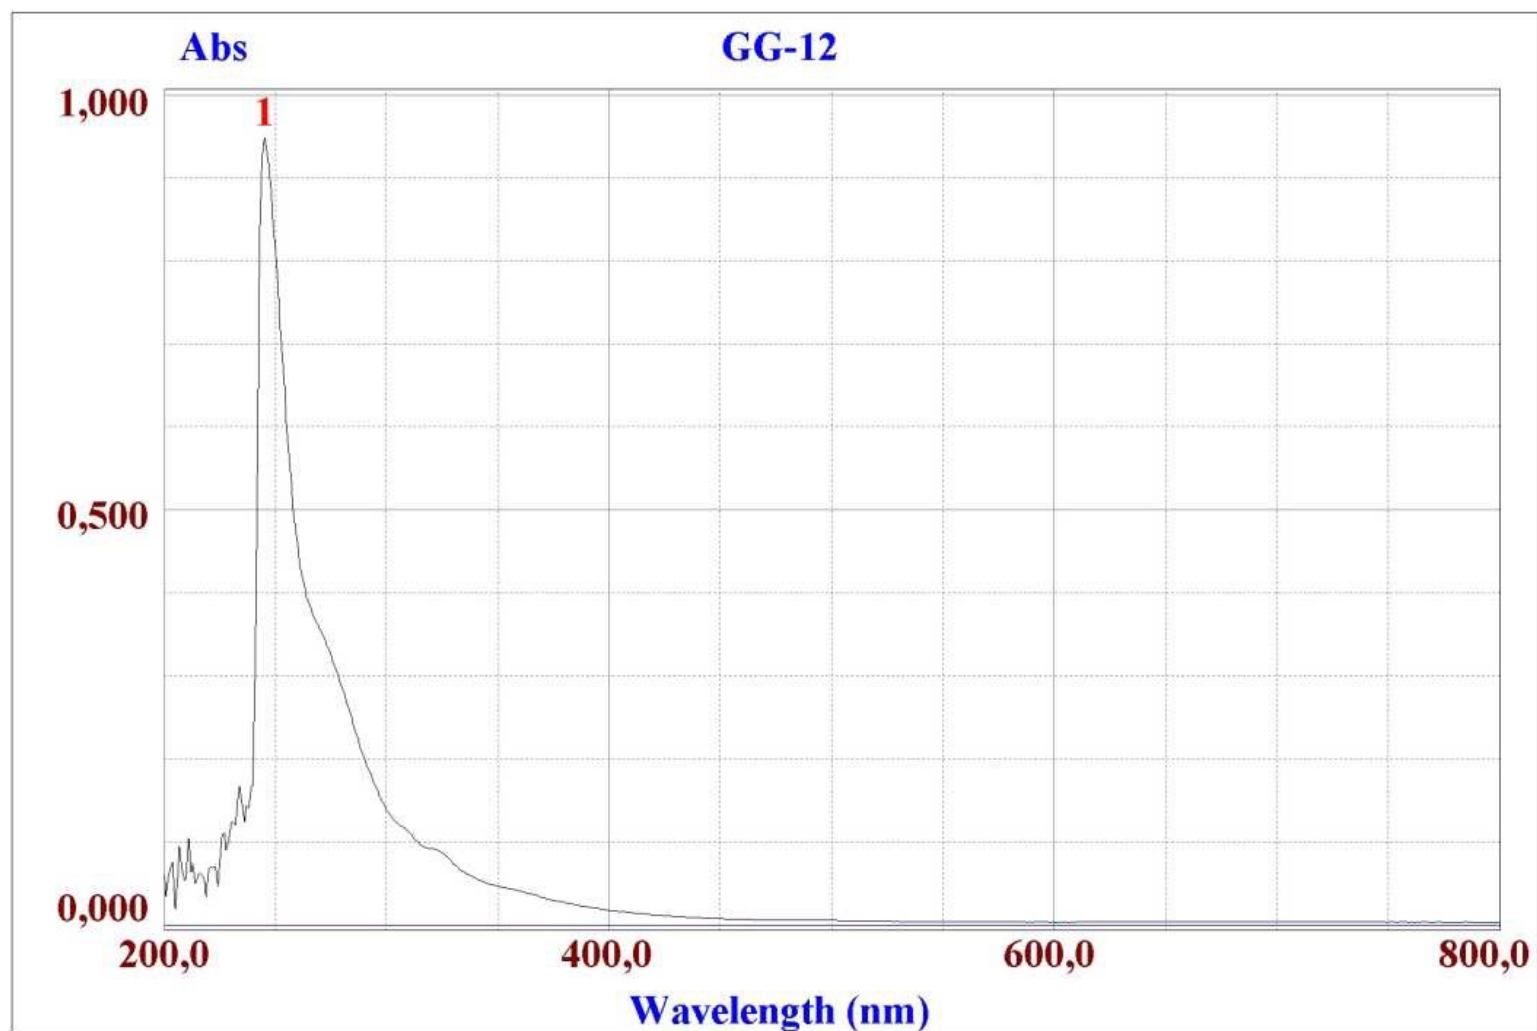

| <u>No.</u> | <u>Peak Type</u> | <u>Position</u> | <u>Height</u> | <u>Area</u> | <u>Start</u> | <u>End</u> |
|------------|------------------|-----------------|---------------|-------------|--------------|------------|
| 1          | Peak             | 245,3           | 0,949         |             |              |            |

Figure S52 UV spectrum of ethyl ester 16.

## Elemental Composition Report

Page 1

### Single Mass Analysis

Tolerance = 10.0 PPM / DBE: min = -1.5, max = 50.0

Isotope cluster parameters: Separation = 1.0 Abundance = 1.0%

Monoisotopic Mass, Odd and Even Electron Ions

31 formula(e) evaluated with 1 results within limits (up to 50 closest results for each mass)

DHA-13

DE2018042309 188 (6.912)

Voltage EI+  
103

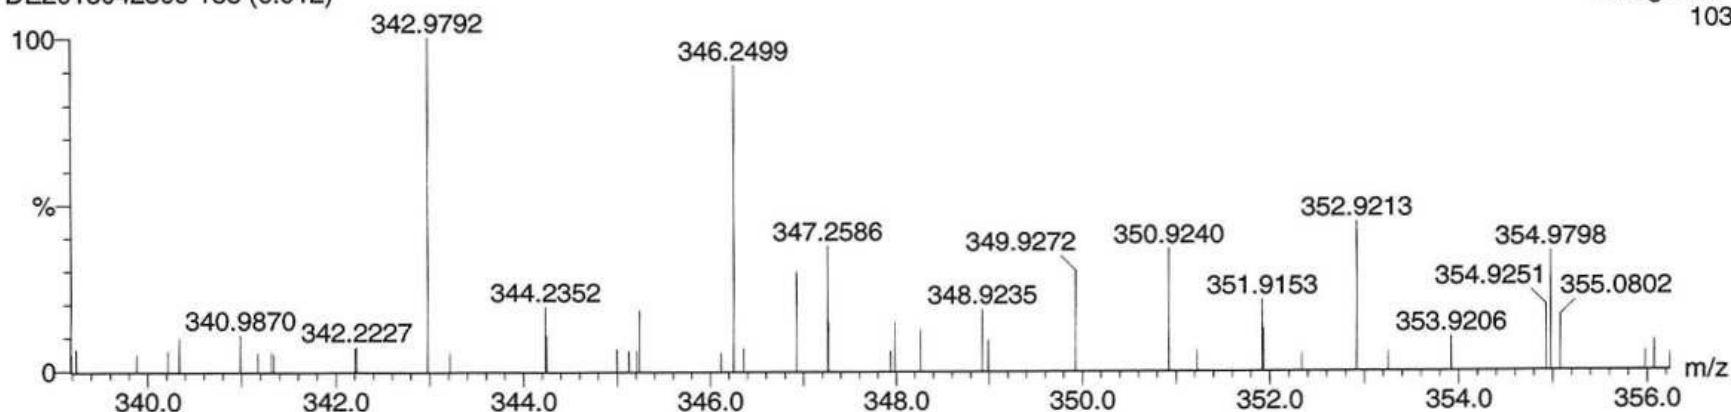

Minimum: -1.5  
Maximum: 200.0 10.0 50.0

| Mass     | Calc. Mass | mDa  | PPM  | DBE | Score | Formula    |
|----------|------------|------|------|-----|-------|------------|
| 346.2499 | 346.2508   | -0.9 | -2.6 | 6.0 | 1     | C22 H34 O3 |

Figure S53 HRMS of ethyl ester 16.

## Mosher esters:

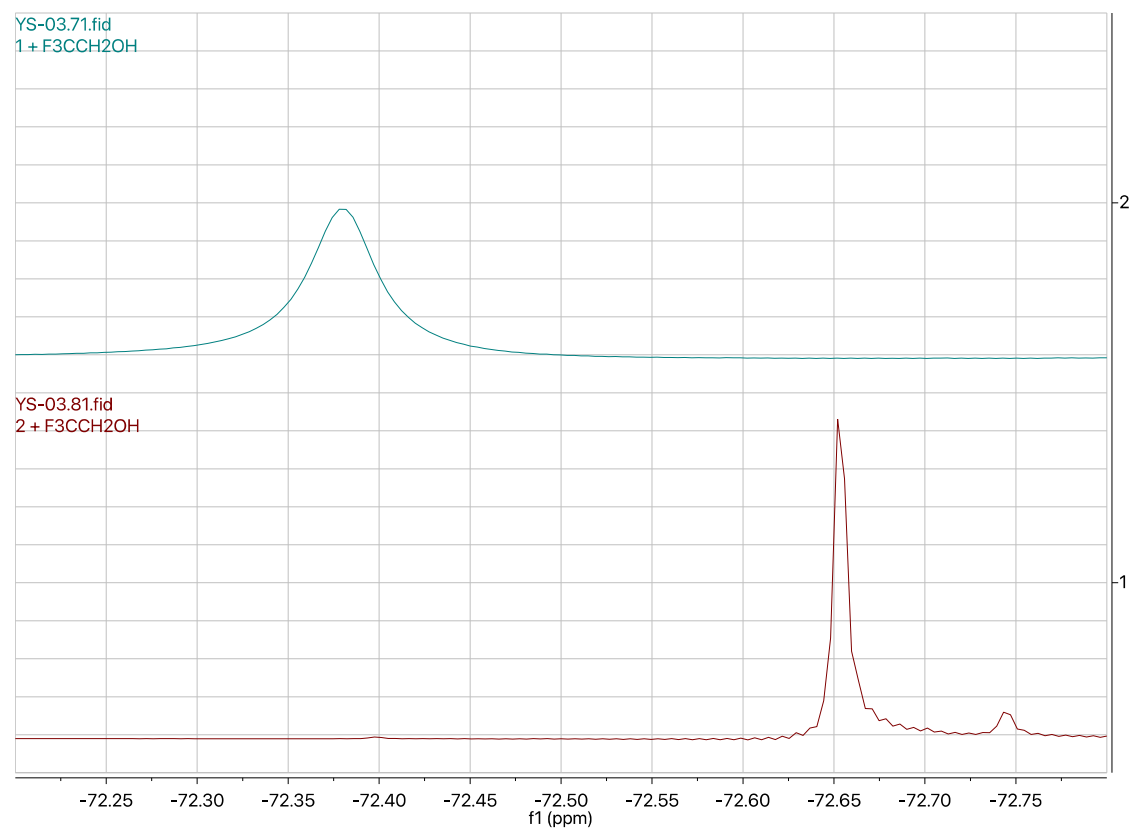

Figure S54  $^{19}\text{F}$  NMR spectrum of assumed (*S*)-isomer of **15**. Top is **15** reacted with (*S*)-MTPA (thus assumingly being *S,S*), while bottom being **15** reacted with (*R*)-MTPA (thus assumingly being *S,R*).

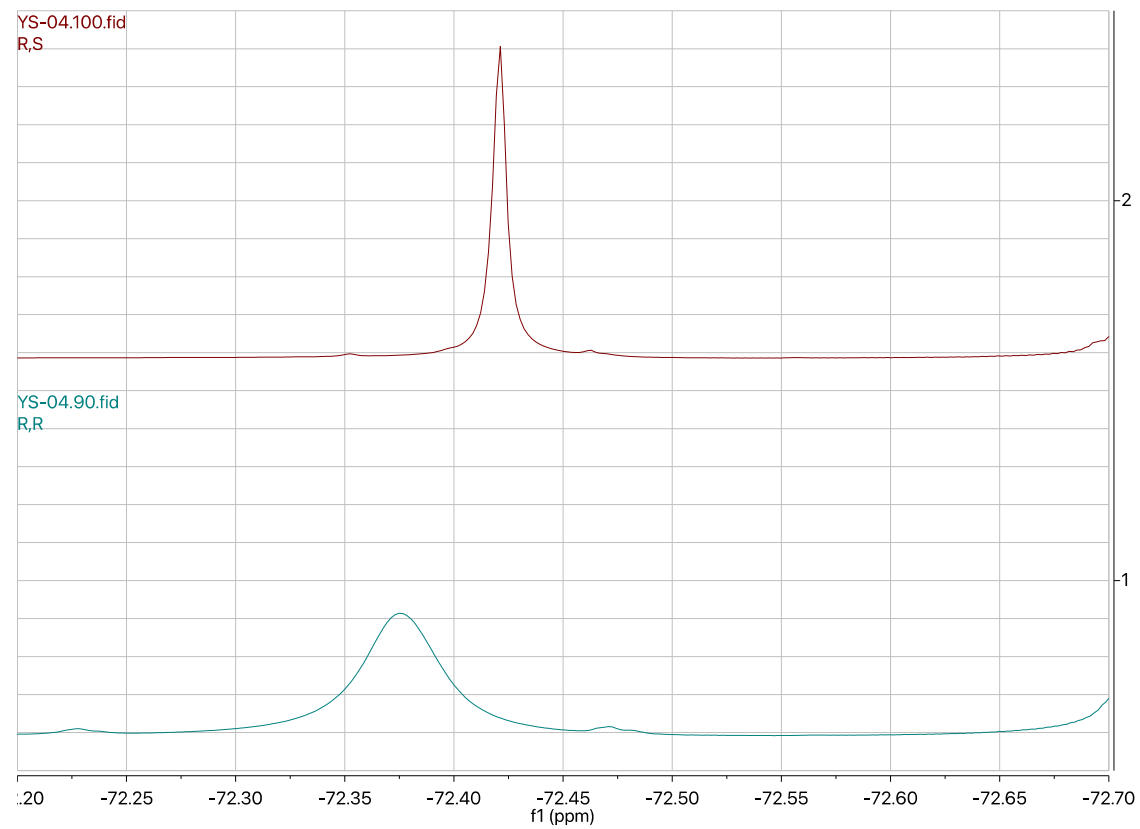

Figure S55  $^{19}\text{F}$  NMR spectrum of assumed (*R*)-isomer of **15**. Top is **15** reacted with (*S*)-MTPA (thus assumingly being *R,S*), while bottom being **15** reacted with (*R*)-MTPA (thus assumingly being *R,R*).
